# Supplementary material for: Chemometric design to explore pharmacophore features of BACE inhibitors for controlling Alzheimer's disease
Source: Royal Society of Chemistry journal article supplement (doi:10.1039/c4mb00540f), 2014-11-13
Supplement: c4mb00540f1.pdf [file c4mb00540f1.pdf]

**Chemometric design to explore pharmacophoric features of BACE  
inhibitors for controlling alzheimer's disease**

Tabassum Hossain, Arup Mukherjee, Achintya Saha\*

Department of Chemical Technology, University of Calcutta, 92, A.P.C. Road,  
Kolkata-700009, India, Tel: +91-33-2350-8386; Fax: +91-33-2351-9755

\* Corresponding author. E-mail: [achintya\\_saha@yahoo.com](mailto:achintya_saha@yahoo.com)

**Supplementary Table 1** Observed and predicted activity of diverse compounds in different models

| Comp No.        | SMILES                                                                                                                                                               | Observed Activity (pIC <sub>50</sub> ) | Predicted Activity through model |       |       |       | Dock Score |
|-----------------|----------------------------------------------------------------------------------------------------------------------------------------------------------------------|----------------------------------------|----------------------------------|-------|-------|-------|------------|
|                 |                                                                                                                                                                      |                                        | 1                                | 2     | 3     | 4     |            |
| 1 <sup>1</sup>  | <chem>c1cccc1CN(CC)Cc2ccc(cc2)-c(c(o3)=O)cc(c34)cc(cc4)OCCNC(=O)Cc5cc(F)cc(F)c5</chem>                                                                               | 3.827                                  | 3.580                            | 3.819 | 3.636 | 3.386 | 69.831     |
| 2 <sup>1</sup>  | <chem>c1cccc1CN(CC)Cc2ccc(cc2)-c(c(o3)=O)cc(c34)cc(cc4)OCCNC(=O)/C=C/c5cc(F)cc(F)c5</chem>                                                                           | 4.004                                  | 4.331                            | 3.669 | 3.566 | 4.045 | 67.789     |
| 3 <sup>1</sup>  | <chem>c1cccc1CN(CC)Cc2ccc(cc2)-c(c(o3)=O)cc(c34)cc(cc4)OCCNC(=O)CCc5cc(F)c(F)c5</chem>                                                                               | 3.936                                  | 4.140                            | 4.141 | 3.720 | 4.352 | 67.368     |
| 4 <sup>1</sup>  | <chem>c1cccc1CN(CC)Cc2ccc(cc2)-c(c(o3)=O)cc(c34)cc(cc4)OCCNC(=O)/C=C/c5cc(Cl)c(Cl)c5</chem>                                                                          | 3.876                                  | 3.811                            | 4.007 | 3.735 | 3.449 | 71.384     |
| 5 <sup>1</sup>  | <chem>c1cccc1CN(CC)Cc2ccc(cc2)-c(c(o3)=O)cc(c34)ccc(c4)OCCNC(=O)Cc5cc(F)cc(F)c5</chem>                                                                               | 3.824                                  | 4.046                            | 3.789 | 3.914 | 4.813 | 59.232     |
| 6 <sup>1</sup>  | <chem>c1cccc1CN(CC)Cc2ccc(cc2)-c(c(o3)=O)cc(c34)ccc(c4)OCCNC(=O)/C=C/c5cc(F)cc(F)c5</chem>                                                                           | 3.917                                  | 3.604                            | 3.887 | 3.861 | 3.498 | 57.466     |
| 7 <sup>1</sup>  | <chem>c1cccc1CN(CC)Cc2ccc(cc2)-c(c(o3)=O)cc(c34)ccc(c4)OCCNC(=O)CCc5cc(F)c(F)c5</chem>                                                                               | 3.943                                  | 3.577                            | 4.092 | 3.998 | 3.420 | 61.743     |
| 8 <sup>1</sup>  | <chem>c1cccc1CN(CC)Cc2ccc(cc2)-c(c(o3)=O)cc(c34)ccc(c4)OCCNC(=O)/C=C/c5cc(Cl)c(Cl)c5</chem>                                                                          | 3.821                                  | 3.524                            | 4.450 | 4.030 | 4.836 | 59.378     |
| 9 <sup>1</sup>  | <chem>O=C(O)c(c1)cc(C(=O)O)cc1NC(=O)[C@H](O)[C@H](Cc2ccccc2)NC(=O)[C@H](CC(C)C)NC(=O)[C@H](C(C)C)NC(=O)[C@@H](N)CCC(=O)O</chem>                                      | 4.260                                  | 5.078                            | 4.690 | 4.742 | 4.501 | 59.261     |
| 10 <sup>1</sup> | <chem>c1ccc(C(=O)O)cc1NC(=O)[C@H](O)[C@H](Cc2ccccc2)NC(=O)[C@H](CC(C)C)NC(=O)[C@H](C(C)C)NC(=O)[C@@H](N)CNC(=O)c3nn[nH]n3</chem>                                     | 5.086                                  | 5.039                            | 5.136 | 5.329 | 4.960 | 65.744     |
| 11 <sup>2</sup> | <chem>O=C(O)c(c1)cc(C(=O)O)cc1NC(=O)[C@H](O)[C@H](Cc2ccccc2)NC(=O)[C@H](CC(C)C)NC(=O)[C@H](C(C)C)NC(=O)[C@@H](N)CNC(=O)c3nn[nH]n3</chem>                             | 5.409                                  | 5.731                            | 5.106 | 5.346 | 6.401 | 55.255     |
| 12 <sup>2</sup> | <chem>n1n[nH]nc1-c(c2)cc(-c3n[nH]nn3)cc2NC(=O)[C@H](O)[C@H](Cc4ccccc4)NC(=O)[C@H](CC(C)C)NC(=O)[C@H](C(C)C)NC(=O)[C@@H](N)CCC(=O)O</chem>                            | 5.194                                  | 5.081                            | 5.280 | 5.192 | 5.296 | 62.357     |
| 13 <sup>2</sup> | <chem>n1n[nH]nc1-c(ccc2)cc2NC(=O)[C@H](O)[C@H](Cc3ccccc3)NC(=O)[C@H](CC(C)C)NC(=O)[C@H](C(C)C)NC(=O)[C@@H](N)CNC(=O)c4nn[nH]n4</chem>                                | 5.319                                  | 5.501                            | 5.267 | 5.129 | 5.853 | 62.281     |
| 14 <sup>2</sup> | <chem>n1n[nH]nc1-c(c2)cc(-c3n[nH]nn3)cc2NC(=O)[C@H](O)[C@H](Cc4ccccc4)NC(=O)[C@H](CC(C)C)NC(=O)[C@H](C(C)C)NC(=O)[C@@H](N)CNC(=O)c5nn[nH]n5</chem>                   | 5.921                                  | 5.768                            | 5.868 | 5.795 | 5.415 | 48.823     |
| 15 <sup>2</sup> | <chem>n1oc(=O)[nH]c1-c(ccc2)cc2NC(=O)[C@H](O)[C@H](Cc3ccccc3)NC(=O)[C@H](CC(C)C)NC(=O)[C@H](C(C)C)NC(=O)[C@@H](N)CNC(=O)c4nn[nH]n4</chem>                            | 5.180                                  | 5.055                            | 5.355 | 5.477 | 5.786 | 52.241     |
| 16 <sup>2</sup> | <chem>n1oc(=S)[nH]c1-c(ccc2)cc2NC(=O)[C@H](O)[C@H](Cc3ccccc3)NC(=O)[C@H](CC(C)C)NC(=O)[C@H](C(C)C)NC(=O)[C@@H](N)CNC(=O)c4nn[nH]n4</chem>                            | 5.194                                  | 5.323                            | 5.409 | 5.477 | 4.865 | 53.229     |
| 17 <sup>3</sup> | <chem>OC(=O)CC[C@@H](C(=O)O)NC(=O)[C@H](C)NC(=O)[C@H](CC(=O)O)NC(=O)[C@H](O)[C@H](Cc1ccccc1)NC(=O)[C@H](CC(C)C)NC(=O)[C@H](C(C)C)NC(=O)[C@@H](N)CNC(=O)C(=O)O</chem> | 4.076                                  | 4.318                            | 5.120 | 4.920 | 4.467 | 64.265     |
| 18 <sup>3</sup> | <chem>c1ccc(C(=O)O)cc1NC(=O)[C@H](O)[C@H](Cc2ccccc2)NC(=O)[C@H](CC(C)C)NC(=O)[C@H](C(C)C)NC(=O)[C@@H](N)CNC(=O)C(=O)O</chem>                                         | 4.796                                  | 5.234                            | 5.006 | 5.059 | 4.068 | 62.413     |
| 19 <sup>3</sup> | <chem>O=C(O)c(c1)cc(C(=O)O)cc1NC(=O)[C@H](O)[C@H](Cc2ccccc2)NC(=O)[C@H](CC(C)C)NC(=O)[C@H](C(C)C)NC(=O)[C@@H](N)CNC(=O)C(=O)O</chem>                                 | 5.328                                  | 5.095                            | 5.975 | 5.075 | 6.142 | 59.635     |
| 20 <sup>3</sup> | <chem>c1ccc(C(=O)O)cc1NC(=O)[C@H](O)[C@H](Cc2ccccc2)NC(=O)[C@H](CC(C)C)NC(=O)[C@H](C(C)C)NC(=O)[C@@H](N)CNC(=O)c3[nH]nnn3</chem>                                     | 5.086                                  | 4.960                            | 5.560 | 5.630 | 5.463 | 62.248     |
| 21 <sup>3</sup> | <chem>O=C(O)c(c1)cc(C(=O)O)cc1NC(=O)[C@H](O)[C@H](Cc2ccccc2)NC(=O)[C@H](CC(C)C)NC(=O)[C@H](C(C)C)NC(=O)[C@@H](N)CNC(=O)c3[nH]nnn3</chem>                             | 5.409                                  | 5.835                            | 5.460 | 5.647 | 6.167 | 54.353     |
| 22 <sup>4</sup> | <chem>c1cccc1-c2n(CC(=O)N=C(N)N)c(cc2)-c3ccccc3</chem>                                                                                                               | 2.432                                  | 2.780                            | 2.027 | 2.300 | 0.156 | 67.287     |
| 23 <sup>4</sup> | <chem>c1cccc(Cl)c1-c2n(CC(=O)N=C(N)N)c(cc2)-c3ccc(cc3)Oc4ccc(cc4)C(=O)C</chem>                                                                                       | 3.155                                  | 3.311                            | 2.762 | 2.680 | 3.561 | 61.584     |

|                 |                                                                                        |       |       |       |       |       |        |
|-----------------|----------------------------------------------------------------------------------------|-------|-------|-------|-------|-------|--------|
| 24 <sup>4</sup> | c1cccc1-c2n(CC(=O)N=C(N)N)c(cc2)C34C[C@@H]5C[C@H](C3)C[C@H](C4)C5                      | 3.222 | 2.976 | 3.040 | 3.152 | 3.255 | 73.896 |
| 25 <sup>4</sup> | CCCOc(cc1)ccc1-c(cc2)n(c2-c3cccc3Cl)CC(=O)/N=C(N)\N[C@H](CC4)CC[C@@H]4C(=O)O           | 4.108 | 4.443 | 3.794 | 3.646 | 4.152 | 66.648 |
| 26 <sup>4</sup> | CCCOc(cc1)ccc1-c(cc2)n(c2-c3cccc3Cl)CC(=O)/N=C(N)\N[C@H]4CC[C@H](O)CC4                 | 3.903 | 3.764 | 4.213 | 3.596 | 3.236 | 73.708 |
| 27 <sup>4</sup> | CCCOc(cc1)ccc1-c(cc2)n(c2-c3cccc3Cl)CC(=O)/N=C(N)\NCCC(=O)O                            | 3.886 | 4.124 | 4.119 | 3.260 | 3.230 | 66.608 |
| 28 <sup>4</sup> | O=C(O)CCN/C(N)=N\C(=O)Cn(c1-c2cccc2Cl)c(cc1)-c3ccc(cc3)OCCC                            | 3.556 | 3.338 | 3.402 | 3.203 | 3.584 | 68.159 |
| 29 <sup>4</sup> | O=C(N)CCN/C(N)=N\C(=O)Cn(c1-c2cccc2Cl)c(cc1)-c3ccc(cc3)OCCC                            | 3.764 | 3.776 | 4.001 | 3.293 | 3.347 | 66.544 |
| 30 <sup>4</sup> | OCCCN/C(N)=N\C(=O)Cn(c1-c2cccc2Cl)c(cc1)-c3ccc(cc3)OCCC                                | 3.917 | 3.815 | 3.397 | 3.373 | 3.629 | 67.101 |
| 31 <sup>4</sup> | OC[C@H](O)CN/C(N)=N\C(=O)Cn(c1-c2cccc2Cl)c(cc1)-c3ccc(cc3)OCCC                         | 3.907 | 3.440 | 4.023 | 3.503 | 3.226 | 69.544 |
| 32 <sup>4</sup> | CCCOc(cc1)ccc1-c(cc2)n(c2-c3cccc3Cl)CC(=O)/N=C(N)\NCCNC(=O)C                           | 3.863 | 3.236 | 3.269 | 3.411 | 3.665 | 75.092 |
| 33 <sup>4</sup> | OCC(C)(C)CN/C(N)=N\C(=O)Cn(c1-c2cccc2Cl)c(cc1)-c3ccc(cc3)OCCC                          | 3.693 | 3.811 | 3.584 | 3.448 | 3.316 | 66.620 |
| 34 <sup>4</sup> | CCCOc(cc1)ccc1-c(cc2)n(c2-c3cccc3Cl)CC(=O)/N=C(N)\NCCCSC                               | 3.493 | 4.256 | 4.090 | 3.288 | 3.637 | 79.265 |
| 35 <sup>4</sup> | CCCOc(cc1)ccc1-c(cc2)n(c2-c3cccc3Cl)CC(=O)/N=C(N)\NCCC4OCCO4                           | 3.570 | 4.115 | 3.819 | 3.404 | 3.309 | 68.196 |
| 36 <sup>4</sup> | CCCOc(cc1)ccc1-c(cc2)n(c2-c3cccc3Cl)CC(=O)/N=C(N)\NCCCN4encc4                          | 3.618 | 3.581 | 3.472 | 3.366 | 3.777 | 68.519 |
| 37 <sup>4</sup> | CCCOc(cc1)ccc1-c(cc2)n(c2-c3cccc3Cl)CC(=O)/N=C(N)\NCc4cccc4                            | 3.124 | 3.175 | 3.015 | 3.308 | 3.434 | 70.784 |
| 38 <sup>4</sup> | CCCOc(cc1)ccc1-c(cc2)n(c2-c3cccc3Cl)CC(=O)/N=C(N)\NCc4occc4                            | 3.253 | 3.420 | 3.363 | 3.085 | 3.444 | 79.727 |
| 39 <sup>4</sup> | CCCOc(cc1)ccc1-c(cc2)n(c2-c3cccc3Cl)CC(=O)/N=C(N)\NCc4c(F)c(F)c(F)cc4                  | 3.693 | 3.366 | 3.752 | 3.367 | 3.428 | 66.278 |
| 40 <sup>4</sup> | CCCOc(cc1)ccc1-c(cc2)n(c2-c3cccc3Cl)CC(=O)/N=C(N)\NCc4cc(OC)c(O)cc4                    | 3.186 | 3.263 | 3.731 | 3.529 | 4.104 | 63.083 |
| 41 <sup>4</sup> | C1[C@H](C2)C[C@@H](C3)C[C@H]2CC13c(cc4)n(c4-c5cccc5)CC(=O)/N=C(N)\NCCCC#N              | 3.593 | 3.699 | 3.822 | 3.517 | 4.597 | 64.915 |
| 42 <sup>4</sup> | OCCCN/C(N)=N\C(=O)Cn(c1-c2cccc2)c(cc1)C34C[C@@H]5C[C@H](C3)C[C@H](C4)C5                | 3.622 | 3.399 | 3.583 | 3.520 | 3.599 | 67.513 |
| 43 <sup>4</sup> | OCCN/C(N)=N\C(=O)Cn(c1-c2cccc2)c(cc1)C34C[C@@H]5C[C@H](C3)C[C@H](C4)C5                 | 3.167 | 3.292 | 2.863 | 3.241 | 3.229 | 66.798 |
| 44 <sup>4</sup> | N#CCCN/C(N)=N\C(=O)Cn(c1-c2cccc2)c(cc1)C34C[C@@H]5C[C@H](C3)C[C@H](C4)C5               | 3.509 | 3.597 | 3.387 | 3.406 | 3.995 | 68.430 |
| 45 <sup>4</sup> | C1[C@H](C2)C[C@@H](C3)C[C@H]2CC13c(cc4)n(c4-c5cccc5)CC(=O)/N=C(N)\NCCCCO               | 3.593 | 3.914 | 3.672 | 3.421 | 3.076 | 70.327 |
| 46 <sup>4</sup> | OC[C@H](O)CN/C(N)=N\C(=O)Cn(c1-c2cccc2)c(cc1)C34C[C@@H]5C[C@H](C3)C[C@H](C4)C5         | 3.271 | 3.426 | 3.445 | 3.685 | 3.656 | 70.396 |
| 47 <sup>4</sup> | C1[C@H](C2)C[C@@H](C3)C[C@H]2CC13c(cc4)n(c4-c5cccc5)CC(=O)/N=C(N)\NCCCn6encc6          | 2.767 | 2.825 | 3.083 | 3.492 | 2.198 | 66.098 |
| 48 <sup>4</sup> | C1[C@H](C2)C[C@@H](C3)C[C@H]2CC13c(cc4)n(c4-c5cccc5)CC(=O)/N=C(N)\N[C@H]6CC[C@H](O)CC6 | 3.548 | 3.656 | 3.363 | 3.804 | 3.531 | 71.046 |
| 49 <sup>4</sup> | C1[C@H](C2)C[C@@H](C3)C[C@H]2CC13c(cc4)n(c4-c5cccc5)CC(=O)/N=C(N)\NC6CCCC6             | 2.143 | 2.348 | 2.700 | 2.787 | 2.615 | 70.810 |
| 50 <sup>4</sup> | C1[C@H](C2)C[C@@H](C3)C[C@H]2CC13c(cc4)n(c4-c5cccc5)CC(=O)/N=C(N)\NCc6oc(nn6)C         | 3.177 | 3.088 | 3.487 | 3.421 | 3.736 | 70.855 |
| 51 <sup>4</sup> | C1[C@H](C2)C[C@@H](C3)C[C@H]2CC13c(cc4)n(c4-c5cccc5)CC(=O)/N=C(N)\NCc6sec(n6)C         | 3.559 | 3.247 | 3.458 | 3.153 | 3.276 | 74.226 |
| 52 <sup>4</sup> | C1[C@H](C2)C[C@@H](C3)C[C@H]2CC13c(cc4)n(c4-c5cccc5)CC(=O)/N=C(N)\NCCc6cccs6           | 3.253 | 2.931 | 3.019 | 3.578 | 3.540 | 71.607 |
| 53 <sup>4</sup> | C1[C@H](C2)C[C@@H](C3)C[C@H]2CC13c(cc4)n(c4-c5cccc5)CC(=O)/N=C(N)\NCc6cc(N)ccc6        | 3.128 | 3.229 | 3.172 | 3.404 | 3.406 | 62.578 |
| 54 <sup>4</sup> | C1[C@H](C2)C[C@@H](C3)C[C@H]2CC13c(cc4)n(c4-c5cccc5)CC(=O)/N=C(N)\NCCc6sc6             | 3.248 | 2.777 | 3.199 | 3.443 | 4.212 | 66.144 |
| 55 <sup>5</sup> | c1cccc(e12)ccc(c2)C(=O)Nc3cc(Br)ccc3N4CCN(CC4)C(=O)OC(C)(C)C                           | 2.770 | 3.468 | 2.654 | 2.748 | 3.070 | 67.996 |
| 56 <sup>5</sup> | c1cccc(e12)ccc(c2)C(=O)Nc3cc(Br)ccc3N4CCN(CC4)Cc5cccc5                                 | 2.284 | 2.712 | 2.756 | 3.226 | 2.586 | 69.074 |
| 57 <sup>5</sup> | c1cccc(e12)oc(=O)c(c2)C(=O)Nc3cc(Br)ccc3N4CCN(CC4)C(=O)OC(C)(C)C                       | 3.000 | 3.187 | 2.889 | 2.719 | 3.668 | 65.290 |
| 58 <sup>5</sup> | c1cccc(e12)oc(=O)c(c2)C(=O)Nc3cc(Br)ccc3N4CCN(CC4)Cc5cccc5                             | 3.119 | 3.310 | 3.125 | 3.172 | 3.369 | 71.943 |
| 59 <sup>5</sup> | c1ccc(OC)c(c12)oc(=O)c(c2)C(=O)Nc3cc(Br)ccc3N4CCN(CC4)C(=O)OC(C)(C)C                   | 2.620 | 3.369 | 2.907 | 3.005 | 3.604 | 65.903 |
| 60 <sup>5</sup> | c1ccc(OC)c(c12)oc(=O)c(c2)C(=O)Nc3cc(Br)ccc3N4CCN(CC4)Cc5cccc5                         | 2.260 | 2.437 | 2.589 | 2.457 | 2.113 | 73.836 |

|                 |                                                                                         |       |       |       |       |       |        |
|-----------------|-----------------------------------------------------------------------------------------|-------|-------|-------|-------|-------|--------|
| 61 <sup>5</sup> | COc(c1)ccc(c12)c(cc(o2)=O)CC(=O)Nc3cc(Br)ccc3N4CCN(CC4)C(=O)OC(C)(C)C                   | 4.032 | 4.187 | 4.812 | 3.432 | 4.447 | 66.704 |
| 62 <sup>5</sup> | COc(c1)ccc(c12)c(cc(o2)=O)CC(=O)Nc3cc(Br)ccc3N4CCN(CC4)S(=O)(=O)c5cccs5                 | 2.947 | 2.709 | 2.788 | 2.537 | 2.742 | 73.254 |
| 63 <sup>5</sup> | c1cccc(c12)c(=O)cc(o2)C(=O)Nc3cc(Br)ccc3N4CCN(CC4)C(=O)OC(C)(C)C                        | 2.721 | 2.927 | 2.920 | 2.329 | 2.078 | 63.487 |
| 64 <sup>5</sup> | c1cccc(c12)c(=O)cc(o2)C(=O)Nc3cc(Br)ccc3N4CCN(CC4)S(=O)(=O)c5cccs5                      | 2.585 | 2.563 | 2.485 | 2.594 | 2.840 | 72.495 |
| 65 <sup>5</sup> | c1cccc(c12)ccc(n2)C(=O)Nc3cc(Br)ccc3N4CCN(CC4)C(=O)OC(C)(C)C                            | 2.770 | 2.947 | 2.382 | 2.809 | 2.205 | 78.068 |
| 66 <sup>6</sup> | C1CCCC1NC(=O)[C@H](C)NC[C@@H](O)[C@H](Cc2cccc2)NC(=O)c3ccc(S(=O)(=O)C)ccc3              | 2.268 | 2.912 | 2.266 | 2.535 | 2.460 | 72.626 |
| 67 <sup>6</sup> | C1CCCC1NC(=O)[C@H](C)NC[C@@H](O)[C@H](Cc2cccc2)NC(=O)c3ccc(ccc3)N(S4(=O)=O)CCCC4        | 2.721 | 2.822 | 2.656 | 3.298 | 2.304 | 70.550 |
| 68 <sup>6</sup> | C1CCCC1NC(=O)[C@H](C)NC[C@@H](O)[C@H](Cc2cccc2)NC(=O)c3ccc(ccc3)N4C(=O)CCCC4            | 2.278 | 2.364 | 2.571 | 3.174 | 2.974 | 66.785 |
| 69 <sup>6</sup> | C1CCCC1NC(=O)[C@H](C)NC[C@@H](O)[C@H](Cc2cccc2)NC(=O)c3ccc(cc3)NC(=O)C                  | 1.208 | 2.744 | 1.876 | 2.853 | 1.022 | 72.938 |
| 70 <sup>6</sup> | C1CCCC1NC(=O)[C@H](C)NC[C@@H](O)[C@H](Cc2cccc2)NC(=O)c3ccc(ccc3)S(=O)(=O)CCCC           | 2.745 | 2.768 | 2.195 | 2.506 | 3.769 | 66.594 |
| 71 <sup>6</sup> | C1CCCC1NC(=O)[C@H](C)NC[C@@H](O)[C@H](Cc2cccc2)NC(=O)c3ccc(cc(c3)OC)N4C(=O)CCCC4        | 3.128 | 3.145 | 3.779 | 3.607 | 3.657 | 60.513 |
| 72 <sup>6</sup> | C1CCCC1NC(=O)[C@H](C)NC[C@@H](O)[C@H](Cc2cccc2)NC(=O)c3ccc(cc(c3)OCC)N4C(=O)CCCC4       | 4.229 | 4.768 | 4.045 | 3.553 | 4.314 | 61.783 |
| 73 <sup>6</sup> | C1CCCC1NC(=O)[C@H](C)NC[C@@H](O)[C@H](Cc2cccc2)NC(=O)c3ccc(cc(c3)OC(C)C)N4C(=O)CCCC4    | 3.921 | 2.962 | 3.606 | 3.500 | 4.001 | 68.821 |
| 74 <sup>6</sup> | C1CCCC1NC(=O)[C@H](C)NC[C@@H](O)[C@H](Cc2cccc2)NC(=O)c3ccc(N4C(=O)CCCC4)cc(c3)OCCCC     | 4.495 | 4.900 | 4.025 | 3.684 | 4.326 | 73.226 |
| 75 <sup>6</sup> | C1CCCC1NC(=O)[C@H](C)NC[C@@H](O)[C@H](Cc2cccc2)NC(=O)c3ccc(cc(c3)OCC)N4CCCC4            | 2.839 | 2.937 | 2.033 | 3.319 | 3.300 | 65.683 |
| 76 <sup>6</sup> | C1CCCC1NC(=O)[C@H](C)NC[C@@H](O)[C@H](Cc2cccc2)NC(=O)c3ccc(N4C(=O)CCCC4)cc(c3)OCCC      | 3.218 | 3.506 | 3.749 | 3.598 | 3.461 | 74.318 |
| 77 <sup>6</sup> | C1CCCC1NC(=O)[C@H](C)NC[C@@H](O)[C@H](Cc2cccc2)NC(=O)c3ccc(cc(c3)NCC)N4C(=O)CCCC4       | 4.886 | 4.933 | 4.697 | 3.731 | 4.452 | 70.999 |
| 78 <sup>6</sup> | C1CCCC1NC(=O)[C@H](C)NC[C@@H](O)[C@H](Cc2cccc2)NC(=O)c3ccc(cc(c3)NC(C)C)N4C(=O)CCCC4    | 4.409 | 5.015 | 4.783 | 3.741 | 4.008 | 69.052 |
| 79 <sup>6</sup> | C1CCCC1NC(=O)[C@H](C)NC[C@@H](O)[C@H](Cc2cccc2)NC(=O)c3ccc(N4C(=O)CCCC4)cc(c3)NCC(C)C   | 3.745 | 3.866 | 3.410 | 3.780 | 4.268 | 65.071 |
| 80 <sup>6</sup> | C1CCCC1NC(=O)[C@H](C)NC[C@@H](O)[C@H](Cc2cccc2)NC(=O)c3ccc(N4C(=O)CCCC4)cc(c3)C5CCCC5   | 3.066 | 3.512 | 3.965 | 3.241 | 3.450 | 77.432 |
| 81 <sup>6</sup> | C1CCCC1NC(=O)[C@H](C)NC[C@@H](O)[C@H](Cc2cccc2)NC(=O)c3ccc(cc(c3)CCC)N4C(=O)CCCC4       | 4.143 | 4.182 | 3.998 | 3.354 | 3.802 | 66.116 |
| 82 <sup>7</sup> | FC(F)(F)c(c1)cccc1CNC[C@@H](O)[C@H](Cc2cccc2)NC(=O)c3c(F)c(cc(c3)NCC)N(S4(=O)=O)CCCC4   | 5.699 | 4.757 | 4.987 | 5.557 | 6.050 | 69.100 |
| 83 <sup>7</sup> | FC(F)(F)c(c1)cccc1CNC[C@@H](O)[C@H](Cc2cccc2)NC(=O)c3c(F)c(cc(c3)NCC)N4C(=O)CCCC4       | 5.046 | 4.430 | 4.963 | 4.304 | 5.331 | 69.870 |
| 84 <sup>7</sup> | CCn(c1)nc1CNC[C@@H](O)[C@H](Cc2cccc2)NC(=O)c3cc(cc(c3)NC)N(S4(=O)=O)CCCC4               | 5.000 | 5.411 | 5.656 | 4.275 | 4.949 | 65.479 |
| 85 <sup>7</sup> | FC(F)(F)c(c1)cccc1CNC[C@@H](O)[C@H](Cc2cccc2)NC(=O)c3ccc(cc(c3)NCC)N4C(=O)CCCC4         | 4.310 | 3.624 | 5.107 | 4.254 | 5.313 | 69.197 |
| 86 <sup>7</sup> | FC(F)(F)c(c1)cccc1CNC[C@@H](O)[C@H](Cc2cccc2)NC(=O)c3ccc(c(C)j(c3)NCC)N4C(=O)CCCC4      | 4.201 | 3.418 | 3.656 | 4.159 | 4.318 | 77.509 |
| 87 <sup>7</sup> | FC(F)(F)c(c1)cccc1CNC[C@@H](O)[C@H](Cc2cccc2)NC(=O)c3ccc(c(OC)c(c3)NCC)N4C(=O)CCCC4     | 3.959 | 4.763 | 3.022 | 4.186 | 4.220 | 75.150 |
| 88 <sup>7</sup> | FC(F)(F)c(c1)cccc1CNC[C@@H](O)[C@H](Cc2cccc2)NC(=O)c3ccc(cc(c3)NCC)N(S4(=O)=O)CCCC4     | 5.301 | 5.382 | 5.410 | 4.459 | 5.622 | 70.802 |
| 89 <sup>7</sup> | FC(F)(F)c(c1)cccc1CNC[C@@H](O)[C@H](Cc2cccc2)NC(=O)c3ccc(c(C)j(c3)NCC)N(S4(=O)=O)CCCC4  | 4.638 | 4.572 | 4.293 | 4.450 | 4.532 | 68.485 |
| 90 <sup>7</sup> | FC(F)(F)c(c1)cccc1CNC[C@@H](O)[C@H](Cc2cccc2)NC(=O)c3ccc(c(OC)c(c3)NCC)N(S4(=O)=O)CCCC4 | 4.745 | 4.135 | 3.896 | 4.819 | 5.716 | 68.375 |
| 91 <sup>7</sup> | FC(F)(F)c(c1)cccc1CNC[C@@H](O)[C@H](Cc2cccc2)NC(=O)c(cc(c34)jn(en4)CC)cc3N5C(=O)CCC5    | 4.721 | 4.915 | 4.794 | 5.121 | 4.344 | 69.468 |
| 92 <sup>7</sup> | FC(F)(F)c(c1)cccc1CNC[C@@H](O)[C@H](Cc2cccc2)NC(=O)c(cc(c34)jn(nc4)CC)cc3N5C(=O)CCC5    | 4.638 | 4.540 | 4.316 | 4.248 | 4.369 | 67.021 |
| 93 <sup>7</sup> | FC(F)(F)c(c1)cccc1CNC[C@@H](O)[C@H](Cc2cccc2)NC(=O)c(cc(c34)j(c[nH]4)CC)cc3N5C(=O)CCC5  | 4.585 | 3.997 | 3.751 | 4.463 | 4.348 | 70.322 |

|                  |                                                                                              |        |        |        |       |        |        |
|------------------|----------------------------------------------------------------------------------------------|--------|--------|--------|-------|--------|--------|
| 947              | FC(F)(F)c(c1)cccc1CNC[C@@H](O)[C@H](Cc2ccccc2)NC(=O)c(cc(c34)j)c(CC)cn4C)cc3N5C(=O)CCCC5     | 4.398  | 3.803  | 4.037  | 4.426 | 4.367  | 69.253 |
| 957              | FC(F)(F)c(c1)cccc1CNC[C@@H](O)[C@H](Cc2ccccc2)NC(=O)c(cc(c34)n(nc4)CC)cc3N5C(=O)CCCC5        | 4.553  | 3.954  | 3.919  | 4.537 | 4.667  | 71.398 |
| 967              | FC(F)(F)c(c1)cccc1CNC[C@@H](O)[C@H](Cc2ccccc2)NC(=O)c(cc(c34)n(nn4)CC)cc3N5C(=O)CCCC5        | 4.469  | 4.603  | 4.629  | 4.080 | 3.817  | 69.098 |
| 977              | FC(F)(F)c(c1)cccc1CNC[C@@H](O)[C@H](Cc2ccccc2)NC(=O)c(cc(c34)j)c(cc4)CC)cc3N5C(=O)CCCC5      | 4.060  | 4.172  | 4.363  | 4.358 | 4.340  | 71.488 |
| 987              | FC(F)(F)c(c1)cccc1CNC[C@@H](O)[C@H](Cc2ccccc2)NC(=O)c(cc(c34)j)c(ccn4)CC)cc3N5C(=O)CCCC5     | 3.678  | 4.243  | 4.219  | 4.449 | 3.334  | 62.486 |
| 997              | FC(F)(F)c(c1)cccc1CNC[C@@H](O)[C@H](Cc2ccccc2)NC(=O)c(cc(c34)n(c(=O)[nH]4)CC)cc3N5C(=O)CCCC5 | 3.377  | 3.901  | 3.423  | 3.825 | 4.371  | 73.675 |
| 1007             | FC(F)(F)c(c1)cccc1C(C)(C)NC[C@@H](O)[C@H](Cc2ccccc2)NC(=O)c3cc(cc(c3)NCC)N(S4(=O)=O)CCCC4    | 5.222  | 5.372  | 4.597  | 4.756 | 5.071  | 82.238 |
| 1017             | c1cc(OC)cc(c12)[C@H](CC2)NC[C@@H](O)[C@H](Cc3ccccc3)NC(=O)c4ccc(cc(c4)NCC)N(S5(=O)=O)CCCC5   | 4.745  | 4.824  | 4.966  | 5.068 | 5.765  | 54.780 |
| 1027             | N#Cc(c1)encc1CNC[C@@H](O)[C@H](Cc2ccccc2)NC(=O)c3ccc(cc(c3)NCC)N(S4(=O)=O)CCCC4              | 4.398  | 3.966  | 4.362  | 4.456 | 3.854  | 57.513 |
| 103 <sup>8</sup> | c1cccc1-c(n2OC)nc(c23)ncccc3                                                                 | 0.032  | 0.833  | 0.689  | 0.933 | 1.102  | 48.576 |
| 104 <sup>8</sup> | n1c(N)[nH]e(c12)ccc(Cl)c2                                                                    | 0.136  | -0.602 | -0.499 | 0.565 | 1.511  | 56.310 |
| 105 <sup>8</sup> | c1cc(Cl)ccc(c12)nc(N)n2CCCO                                                                  | 0.114  | 0.110  | 0.695  | 0.299 | 0.781  | 55.796 |
| 106 <sup>8</sup> | c1ccnc(n12)nc2-c3ccc(Cl)c3                                                                   | 0.064  | 0.534  | 0.456  | 1.044 | 0.125  | 56.187 |
| 107 <sup>8</sup> | c1ccnc(n12)nc2-c3cncnc3                                                                      | -0.003 | 0.795  | 0.393  | 1.107 | -0.115 | 56.244 |
| 108 <sup>8</sup> | c1cccc(c12)C(=O)C(C2=O)(O)O                                                                  | 0.110  | -0.055 | 0.392  | 0.265 | 1.127  | 58.395 |
| 109 <sup>8</sup> | c1c(Cl)ccc(c12)n(c(n2)N)CCCC(=O)NCc3ccccc3                                                   | -0.147 | 0.089  | 0.996  | 0.378 | 1.170  | 57.691 |
| 110 <sup>8</sup> | c1c(Cl)ccc(c12)n(c(n2)N)CCCC(=O)N(C)C3CCCCC3                                                 | 1.585  | 1.234  | 1.420  | 0.599 | 1.480  | 48.108 |
| 111 <sup>8</sup> | c1c(Cl)ccc(c12)n(c(n2)N)CCCC(=O)NC(C)C                                                       | 0.714  | 0.605  | 0.536  | 0.301 | 0.534  | 57.592 |
| 112 <sup>8</sup> | c1c(Cl)ccc(c12)n(c(n2)N)CCCC(=O)NCCN3CCOCC3                                                  | 0.082  | 0.816  | 0.513  | 0.338 | 0.890  | 57.553 |
| 113 <sup>8</sup> | c1c(Cl)ccc(c12)n(c(n2)N)CCCC(=O)NCC[C@H]3CCNC3                                               | 0.353  | 1.485  | 0.907  | 0.451 | 1.388  | 64.265 |
| 114 <sup>8</sup> | c1c(Cl)ccc(c12)n(c(n2)N)CCCC(=O)NCc3ccccc3                                                   | 0.371  | 0.881  | 1.020  | 0.343 | 0.137  | 63.882 |
| 115 <sup>8</sup> | c1c(Cl)ccc(c12)n(c(n2)N)CCCC(=O)NCC3CCCCC3                                                   | 1.081  | 1.238  | 1.426  | 0.454 | 1.487  | 69.678 |
| 116 <sup>8</sup> | c1c(Cl)ccc(c12)n(c(n2)N)CCCC(=O)NC3CCN(C)CC3                                                 | 0.488  | 1.005  | 1.578  | 0.425 | 0.344  | 58.204 |
| 117 <sup>8</sup> | c1c(Cl)ccc(c12)n(c(n2)N)CCCC(=O)NCc3cc(F)ccc3                                                | 0.604  | 0.268  | 0.514  | 0.647 | 0.647  | 51.833 |
| 118 <sup>8</sup> | c1c(Cl)ccc(c12)n(c(n2)N)CCCC(=O)NCC3CC3                                                      | -0.455 | 0.741  | 0.393  | 0.448 | -0.334 | 49.457 |
| 119 <sup>8</sup> | c1c(Cl)ccc(c12)n(c(n2)N)CCCC(=O)N(C)Cc3cc(F)ccc3                                             | 0.712  | 1.376  | 1.673  | 0.861 | 0.502  | 74.233 |
| 120 <sup>8</sup> | c1c(Cl)ccc(c12)n(c(n2)N)CCCC(=O)N(C)CC3CCCCC3                                                | 1.229  | 1.530  | 1.611  | 0.656 | 1.772  | 80.533 |
| 121 <sup>9</sup> | COc(c1)cccc1CNC[C@@H](O)[C@H](Cc2ccccc2)NC(=O)c3cccc(c3)C(=O)N(CCC)CCC                       | 3.721  | 3.767  | 3.719  | 3.970 | 3.635  | 63.063 |
| 122 <sup>9</sup> | COc(c1)cccc1CNC[C@@H](O)[C@H](Cc2ccc(F)cc(F)e2)NC(=O)c3cccc(c3)C(=O)N(CCC)CCC                | 4.745  | 3.984  | 4.472  | 4.371 | 4.684  | 63.082 |
| 123 <sup>9</sup> | COc(c1)cccc1CNC[C@@H](O)[C@H](Cc2ccccc2)NC(=O)c3cn(C(=O)N(C)CC)j(c34)cccc4                   | 2.824  | 3.372  | 3.366  | 3.879 | 2.503  | 53.764 |
| 124 <sup>9</sup> | COc(c1)cccc1CNC[C@@H](O)[C@H](Cc2ccccc2)NC(=O)c3cn(c(c34)ccc4)C(=O)N(CCC)CCC                 | 3.620  | 3.600  | 3.660  | 3.704 | 2.920  | 54.208 |
| 125 <sup>9</sup> | COc(c1)cccc1CNC[C@@H](O)[C@H](Cc2ccccc2)NC(=O)c3cn(c(c34)ccc4)C(=O)N(CCCC)CCCC               | 4.027  | 4.210  | 4.377  | 3.734 | 4.197  | 59.936 |
| 126 <sup>9</sup> | COc(c1)cccc1CNC[C@@H](O)[C@H](Cc2ccc(F)cc(F)e2)NC(=O)c3cn(c(c34)cccc4)C(=O)N(CCCC)CCCC       | 4.347  | 4.572  | 4.586  | 4.136 | 4.404  | 54.023 |
| 127 <sup>9</sup> | COc(c1)cccc1CNC[C@@H](O)[C@H](Cc2ccccc2)NC(=O)c3cn(CCCC)c(c34)cccc4                          | 1.420  | 2.027  | 2.000  | 2.015 | 1.866  | 48.088 |
| 128 <sup>9</sup> | COc(c1)cccc1CNC[C@@H](O)[C@H](Cc2ccccc2)NC(=O)c3cn(c(c34)ccc4)S(=O)(=O)CCCC                  | 2.509  | 4.347  | 3.556  | 2.896 | 2.725  | 57.816 |
| 129 <sup>9</sup> | COc(c1)cccc1CNC[C@@H](O)[C@H](Cc2ccc(F)cc(F)e2)NC(=O)c3cn(c(c34)cccc4)C(=O)OCCCC             | 2.959  | 3.439  | 2.966  | 3.825 | 2.345  | 57.302 |
| 130 <sup>9</sup> | COc(c1)cccc1CNC[C@@H](O)[C@H](Cc2ccc(F)cc(F)e2)NC(=O)c3cn(c(c34)cccc4)C(=O)NCCCC             | 3.721  | 3.528  | 3.662  | 4.132 | 3.327  | 31.358 |
| 131 <sup>9</sup> | COc(c1)cccc1CNC[C@@H](O)[C@H](Cc2ccc(F)cc(F)e2)NC(=O)c3cn(c(c34)cccc4)C(=O)N(C)CCCC          | 5.131  | 4.949  | 5.119  | 4.341 | 5.349  | 57.525 |
| 132 <sup>9</sup> | COc(c1)cccc1CNC[C@@H](O)[C@H](Cc2ccc(F)cc(F)e2)NC(=O)c3cn(c(c34)ccc(F)cc4)C(=O)N(C)CCCC      | 4.180  | 4.236  | 3.569  | 4.318 | 4.409  | 71.900 |
| 133 <sup>9</sup> | COc(c1)cccc1CNC[C@@H](O)[C@H](Cc2ccc(F)cc(F)e2)NC(=O)c3cn(c(c34)ccc(C#N)cc4)C(=O)N(C)CCCC    | 3.921  | 3.567  | 3.782  | 4.332 | 3.737  | 64.717 |
| 134 <sup>9</sup> | COc(c1)cccc1CNC[C@@H](O)[C@H](Cc2ccc(F)cc(F)e2)NC(=O)c3cn(c(c34)ccc(F)cc4)C(=O)N(C)CCCC      | 4.886  | 4.464  | 4.314  | 4.339 | 4.362  | 67.957 |
|                  | COc(c1)cccc1CNC[C@@H](O)[C@H](Cc2ccc(F)cc(F)e2)NC(=O)c3cn(c(c34)ccc(F)cc4)C(=O)N(C)CCCC      | 4.522  | 5.222  | 4.487  | 4.275 | 4.322  | 66.210 |

|                   |                                                                                                     |       |       |       |       |       |        |  |  |
|-------------------|-----------------------------------------------------------------------------------------------------|-------|-------|-------|-------|-------|--------|--|--|
|                   | 34)ccc(Cl)c4)C(=O)N(C)CCCC                                                                          |       |       |       |       |       |        |  |  |
| 136 <sup>9</sup>  | COc(c1)cccc1CNC[C@@H](O)[C@H](Cc2cc(F)cc(F)c2)NC(=O)c3cn(c(c34)ccc(c4)C#N)C(=O)N(C)CCCC             | 4.745 | 4.818 | 4.766 | 4.354 | 4.270 | 65.096 |  |  |
| 137 <sup>9</sup>  | COc(c1)cccc1CNC[C@@H](O)[C@H](Cc2cc(F)cc(F)c2)NC(=O)c3cn(c(c34)ccc(c4)C(F)(F)C(=O)N(C)CCCC          | 3.796 | 3.870 | 3.879 | 4.385 | 3.406 | 64.072 |  |  |
| 138 <sup>9</sup>  | COc(c1)cccc1CNC[C@@H](O)[C@H](Cc2cc(F)cc(F)c2)NC(=O)c3cn(C(=O)N(C)CCCC)c(c34)ccc(c4)C(=O)OCc5ccccc5 | 3.066 | 2.880 | 3.641 | 4.719 | 3.211 | 61.632 |  |  |
| 139 <sup>9</sup>  | COc(c1)cccc1CNC[C@@H](O)[C@H](Cc2cc(F)cc(F)c2)NC(=O)c3cn(c(c34)ccc(c4)C(=O)O)C(=O)N(C)CCCC          | 4.155 | 4.589 | 4.528 | 4.474 | 4.881 | 53.789 |  |  |
| 140 <sup>9</sup>  | COc(c1)cccc1CNC[C@@H](O)[C@H](Cc2cc(F)cc(F)c2)NC(=O)c3cn(c(c34)nccc4)C(=O)N(C)CCCC                  | 4.481 | 4.181 | 3.458 | 4.255 | 4.738 | 67.282 |  |  |
| 141 <sup>9</sup>  | c1e(Br)cccc1CNC[C@@H](O)[C@H](Cc2ccccc2)NC(=O)c3cn(c(c34)nccc4)C(=O)N(C)CCCC                        | 4.638 | 3.551 | 3.676 | 3.684 | 3.943 | 67.032 |  |  |
| 142 <sup>9</sup>  | CCc(c1)cccc1CNC[C@@H](O)[C@H](Cc2cc(F)cc(F)c2)NC(=O)c3cn(c(c34)nccc4)C(=O)N(C)CCCC                  | 5.066 | 4.324 | 4.638 | 3.943 | 5.640 | 65.714 |  |  |
| 143 <sup>9</sup>  | CCc(c1)cccc1C2(CC2)NC[C@@H](O)[C@H](Cc3cc(F)cc(F)c3)NC(=O)c4en(c(c45)nccc5)C(=O)N(C)CCCC            | 4.092 | 3.107 | 3.994 | 4.436 | 4.006 | 49.730 |  |  |
| 144 <sup>9</sup>  | c1cccc1OC)CNC[C@@H](O)[C@H](Cc2ccccc2)NC(=O)c3cn(c(c34)nccc4)C(=O)N(C)CCCC                          | 2.187 | 2.383 | 2.940 | 3.765 | 2.610 | 53.443 |  |  |
| 145 <sup>9</sup>  | COc(c1)cccc1CNC[C@@H](O)[C@H](Cc2cc(F)cc(F)c2)NC(=O)c3cn(c(c34)nccc4)C(=O)N(C)CCCC                  | 4.495 | 4.486 | 4.843 | 4.197 | 4.361 | 58.177 |  |  |
| 146 <sup>9</sup>  | COc(c1)cccc1CNC[C@@H](O)[C@H](Cc2cc(F)cc(F)c2)NC(=O)c3cn(c(c34)nccc4)C(=O)N(C)CCC(C)C               | 4.553 | 4.313 | 4.603 | 4.258 | 4.706 | 56.145 |  |  |
| 147 <sup>9</sup>  | COc(c1)cccc1CNC[C@@H](O)[C@H](Cc2cc(F)cc(F)c2)NC(=O)c3cn(c(c34)nccc4)C(=O)N(C)CCC)CC5CC5            | 3.678 | 3.449 | 3.707 | 3.763 | 3.305 | 51.523 |  |  |
| 148 <sup>9</sup>  | COc(c1)cccc1CNC[C@@H](O)[C@H](Cc2cc(F)cc(F)c2)NC(=O)c3cn(c(c34)nccc4)C(=O)N(C)CCOC                  | 4.137 | 4.490 | 4.473 | 4.406 | 4.519 | 63.677 |  |  |
| 149 <sup>9</sup>  | COc(c1)cccc1CNC[C@@H](O)[C@H](Cc2cc(F)cc(F)c2)NC(=O)c3cn(c(c34)nccc4)C(=O)N5CCCC[C@@H]5COC          | 5.000 | 4.634 | 4.878 | 4.232 | 5.173 | 70.510 |  |  |
| 150 <sup>9</sup>  | COc(c1)cccc1CNC[C@@H](O)[C@H](Cc2cc(F)cc(F)c2)NC(=O)c3cn(c(c34)nccc4)C(=O)N5CCCC[C@@H]5COCC         | 4.921 | 4.599 | 4.200 | 4.159 | 4.684 | 75.738 |  |  |
| 151 <sup>9</sup>  | COc(c1)cccc1CNC[C@@H](O)[C@H](Cc2cc(F)cc(F)c2)NC(=O)c3cn(c(c34)nccc4)C(=O)N5CCCC[C@@H]5COC          | 4.523 | 4.365 | 4.676 | 4.105 | 4.247 | 65.897 |  |  |
| 152 <sup>9</sup>  | COc(c1)cccc1CNC[C@@H](O)[C@H](Cc2cc(F)cc(F)c2)NC(=O)c3cn(c(c34)nccc4)C(=O)N5CCCC[C@@H]5COCC         | 4.585 | 4.691 | 4.957 | 4.067 | 4.843 | 51.433 |  |  |
| 153 <sup>10</sup> | CCCCNC(=O)[C@H](C)C[C@H](O)[C@H](CC(C)C)NC(=O)[C@H](C)CSC)NC(=O)CCC(C)C                             | 2.854 | 3.002 | 3.593 | 2.595 | 2.492 | 46.159 |  |  |
| 154 <sup>10</sup> | CCCCNC(=O)[C@H](C)C[C@H](O)[C@H](CC(C)C)NC(=O)[C@H](C)NC(=O)CCC(C)C                                 | 2.432 | 2.846 | 2.619 | 2.499 | 2.966 | 46.159 |  |  |
| 155 <sup>10</sup> | CCCCNC(=O)[C@H](C)C[C@H](O)[C@H](CC(C)C)NC(=O)[C@H](C)N(C)C(=O)CCC(C)C                              | 2.620 | 2.366 | 3.187 | 2.725 | 3.670 | 67.507 |  |  |
| 156 <sup>10</sup> | CCCCNC(=O)[C@H](C)C[C@H](O)[C@H]1NC(=O)[C@H](C)NC(=O)CCCCC[C@H](C1)C                                | 2.796 | 2.755 | 3.031 | 2.659 | 3.055 | 60.083 |  |  |
| 157 <sup>10</sup> | CCCCNC(=O)[C@H](C)C[C@H](O)[C@H]1NC(=O)[C@H](C)NC(=O)CCCCC[C@H](C1)C                                | 3.229 | 2.967 | 2.848 | 2.701 | 3.141 | 60.937 |  |  |
| 158 <sup>10</sup> | CCCCNC(=O)[C@H](C)C[C@H](O)[C@H]1NC(=O)[C@H](C)NC(=O)CCCCCCCC1                                      | 2.119 | 2.743 | 2.792 | 2.651 | 1.849 | 74.251 |  |  |
| 159 <sup>10</sup> | CCCCNC(=O)[C@H](C)C[C@H](O)[C@H]1NC(=O)[C@H](C)NC(=O)CCCCC[C@H](C1)C                                | 3.602 | 3.391 | 3.312 | 2.720 | 3.239 | 61.496 |  |  |
| 160 <sup>10</sup> | CCCCNC(=O)[C@H](C)C[C@H](O)[C@H]1NC(=O)[C@H](C)NC(=O)CCCCC[C@H](C1)C                                | 2.678 | 2.378 | 2.844 | 2.743 | 2.403 | 53.248 |  |  |
| 161 <sup>10</sup> | CCCCNC(=O)[C@H](C)C[C@H](O)[C@H]1NC(=O)[C@H](C)N(C)C(=O)CCCCC[C@H](C1)C                             | 2.602 | 2.017 | 2.565 | 2.774 | 2.684 | 80.953 |  |  |
| 162 <sup>10</sup> | CCCCNC(=O)[C@H](C)C[C@H](O)[C@H]1NC(=O)[C@H](C)N(C)C(=O)CCCCC[C@H](C1)C                             | 3.824 | 3.259 | 3.717 | 2.793 | 3.505 | 66.084 |  |  |
| 163 <sup>11</sup> | c1cccc1C[C@@H]([C@H](O)CNC2CC2)NC(=O)c3cc(N(C)S(=O)(=O)C)cc(c3)C(=O)N[C@H](C)c4cccc4                | 3.551 | 3.138 | 2.752 | 3.312 | 3.006 | 67.542 |  |  |
| 164 <sup>11</sup> | c1cccc1C[C@@H]([C@H](O)CNC2CC2)NC(=O)c3cc(O)cc(c3)C(=O)N[C@H](C)c4cccc4                             | 2.801 | 2.751 | 2.402 | 2.964 | 2.854 | 58.644 |  |  |
| 165 <sup>11</sup> | c1cccc1C[C@@H]([C@H](O)CNC2CC2)NC(=O)c3cc(OC)cc(c3)C(=O)N[C@H](C)c4cccc4                            | 2.601 | 2.806 | 3.367 | 3.061 | 2.793 | 65.871 |  |  |
| 166 <sup>11</sup> | c1cccc1C[C@@H]([C@H](O)CNC2CC2)NC(=O)c3cc(C#C)cc(c3)C(=O)N[C@H](C)c4cccc4                           | 3.051 | 2.853 | 3.044 | 2.680 | 3.481 | 71.015 |  |  |
| 167 <sup>11</sup> | c1cccc1C[C@@H]([C@H](O)CNC2CC2)NC(=O)c3cc(-c4ccsc4)cc(c3)C(=O)N[C@H](C)c5cccc5                      | 2.651 | 3.323 | 3.194 | 2.712 | 2.206 | 67.903 |  |  |

|                   |                                                                                         |       |       |       |       |       |        |
|-------------------|-----------------------------------------------------------------------------------------|-------|-------|-------|-------|-------|--------|
| 168 <sup>11</sup> | c1cccc1C[C@@H]([C@H](O)CNC2CC2)NC(=O)c3cc(-c4ccc(Cl)cc4)cc(c3)C(=O)N[C@H](C)c5cccc5     | 3.091 | 3.676 | 3.312 | 2.997 | 3.020 | 71.918 |
| 169 <sup>11</sup> | c1cccc1C[C@@H]([C@H](O)CNC2CC2)NC(=O)c3cc(C#Cc4cccc4)cc(c3)C(=O)N[C@H](C)c5cccc5        | 2.951 | 2.728 | 2.846 | 2.822 | 2.620 | 64.715 |
| 170 <sup>11</sup> | c1cccc1C[C@@H]([C@H](O)CNC2CC2)NC(=O)c3cc(cc(c3)C(=O)N[C@H](C)c4cccc4)-c5nnn(c5)C6cccc6 | 2.901 | 3.190 | 3.488 | 3.506 | 2.413 | 72.616 |
| 171 <sup>11</sup> | c1cccc1C[C@@H]([C@H](O)CNC2CC2)NC(=O)c3cc(N(S4(=O)=O)CC(C4)cc(c3)C(=O)N[C@H](C)c5cccc5  | 2.751 | 2.285 | 2.689 | 3.804 | 2.896 | 69.155 |
| 172 <sup>11</sup> | c1cccc1C[C@@H]([C@H](O)CNC2CC2)NC(=O)c3cc(N(S4(=O)=O)CC(C4)cc(c3)C(=O)N[C@H](C)c5cccc5  | 3.801 | 3.863 | 3.302 | 3.787 | 4.955 | 60.686 |
| 173 <sup>11</sup> | c1cccc1C[C@@H]([C@H](O)CNC2CC2)NC(=O)c(c3)cc(c(c34)cc(o4)C)C(=O)N[C@H](C)c5cccc5        | 3.281 | 3.763 | 3.367 | 2.930 | 3.118 | 61.496 |
| 174 <sup>11</sup> | c1cccc1C[C@@H]([C@H](O)CNC2CC2)NC(=O)c(c3)cc(c(c34)CCCCO4)C(=O)N[C@H](C)c5cccc5         | 4.201 | 3.594 | 3.406 | 3.343 | 4.365 | 50.051 |
| 175 <sup>11</sup> | c1cccc1C[C@@H]([C@H](O)CNC2CC2)NC(=O)c(c3)cc(c(c34)CCCCO4)C(=O)N[C@H](C)c5cccc5         | 4.252 | 4.412 | 4.143 | 3.240 | 4.282 | 60.674 |
| 176 <sup>11</sup> | c1cccc1C[C@@H]([C@H](O)CNC2CC2)NC(=O)c(c3)cc(c(c34)CCCCO4)C(=O)N[C@H](C)c5ccc(F)cc5     | 3.131 | 3.283 | 4.106 | 3.390 | 3.407 | 59.391 |
| 177 <sup>11</sup> | c1cccc1C[C@@H]([C@H](O)CNC2CC2)NC(=O)c(c3)cc(c(c34)CCCCO4)C(=O)N[C@H](C)c5ccc(F)cc5     | 3.582 | 3.843 | 3.578 | 3.286 | 3.368 | 67.267 |
| 178 <sup>11</sup> | c1cccc1C[C@@H]([C@H](O)CNC2CC2)NC(=O)c3cc(cc(c34)oc(c4)C)C(=O)N[C@H](C)c5cccc5          | 3.001 | 2.940 | 3.555 | 2.958 | 3.499 | 47.835 |
| 179 <sup>11</sup> | c1cccc1C[C@@H]([C@H](O)CNC2CC2)NC(=O)c3cc(cc(c34)OCCC4)C(=O)N[C@H](C)c5cccc5            | 3.951 | 3.513 | 4.078 | 3.096 | 3.736 | 55.167 |
| 180 <sup>11</sup> | c1cccc1C[C@@H]([C@H](O)CNC2CC2)NC(=O)c3cc(cc(c34)OCCC4)C(=O)N[C@H](C)c5cccc5            | 4.051 | 3.920 | 4.865 | 3.078 | 4.428 | 52.974 |
| 181 <sup>12</sup> | n1cccc(c1F)-c(ccc2)cc2[C@@]3(C(=O)N(C)C(=N3)N)c4ccc(cc4)OC(F)F                          | 5.000 | 4.319 | 4.031 | 4.385 | 4.926 | 54.733 |
| 182 <sup>12</sup> | FC(F)Oe(cc1)ccc1[C@]2(C(=O)N(C)C(=N2)N)c3cccc3                                          | 3.770 | 3.040 | 3.390 | 3.200 | 3.373 | 55.551 |
| 183 <sup>12</sup> | n1cccc(c1F)-c(ccc2)cc2[C@@]3(C(=O)N(C)C(=N3)N)c4ccc(cc4)OC                              | 4.523 | 4.494 | 4.389 | 4.277 | 4.627 | 55.928 |
| 184 <sup>12</sup> | n1cccc(c1F)-c(ccc2)cc2[C@@]3(C(=O)N(C)C(=N3)N)c4ccc(cc4)OC(F)F                          | 4.222 | 4.184 | 4.232 | 4.512 | 4.631 | 53.847 |
| 185 <sup>12</sup> | n1cccc(c1F)-c(ccc2)cc2[C@@]3(C(=O)N(C)C(=N3)N)c4ccc(cc4)OCCF                            | 4.523 | 3.758 | 4.072 | 4.443 | 4.938 | 59.518 |
| 186 <sup>12</sup> | FC(F)(F)Oe(cc1)ccc1[C@]2(C(=O)N(C)C(=N2)N)c3cccc3                                       | 2.848 | 1.927 | 1.912 | 2.267 | 2.433 | 59.018 |
| 187 <sup>12</sup> | FC(F)Oe(cc1)ccc1[C@]2(C(=O)N(C)C(=N2)N)c3cccc3                                          | 2.907 | 3.074 | 3.159 | 4.069 | 2.583 | 63.822 |
| 188 <sup>12</sup> | FC(F)Oe(cc1)ccc1[C@]2(C(=O)N(C)C(=N2)N)c3ccc(CC)ccc3                                    | 3.046 | 3.693 | 3.430 | 4.182 | 2.995 | 59.682 |
| 189 <sup>12</sup> | c1ccc(CCC)cc1[C@@]2(C(=O)N(C)C(=N2)N)c3ccc(cc3)OC(F)F                                   | 4.046 | 3.752 | 4.063 | 4.182 | 4.272 | 60.838 |
| 190 <sup>12</sup> | CCCCc(ccc1)ccc1[C@@]2(C(=O)N(C)C(=N2)N)c3ccc(OC(F)F)cc3                                 | 4.523 | 4.266 | 4.105 | 4.200 | 4.237 | 60.036 |
| 191 <sup>12</sup> | FC(F)Oe(cc1)ccc1[C@]2(C(=O)N(C)C(=N2)N)c3ccc(cc3)CCCC                                   | 4.046 | 4.372 | 4.509 | 4.188 | 3.731 | 59.144 |
| 192 <sup>12</sup> | FC(F)Oe(cc1)ccc1[C@]2(C(=O)N(C)C(=N2)N)c3ccc(cc3)C[C@H](C)CC                            | 3.959 | 4.115 | 4.448 | 4.248 | 4.279 | 60.280 |
| 193 <sup>12</sup> | FC(F)(F)CCCc(ccc1)ccc1[C@@]2(C(=O)N(C)C(=N2)N)c3ccc(cc3)OC(F)F                          | 4.222 | 4.294 | 4.116 | 4.189 | 4.014 | 64.851 |
| 194 <sup>12</sup> | N#CCCCc(ccc1)ccc1[C@@]2(C(=O)N(C)C(=N2)N)c3ccc(cc3)OC(F)F                               | 4.301 | 4.356 | 4.150 | 4.210 | 4.604 | 60.819 |
| 195 <sup>12</sup> | FCCCC(=O)c(ccc1)ccc1[C@@]2(C(=O)N(C)C(=N2)N)c3ccc(cc3)OC(F)F                            | 4.097 | 3.437 | 4.197 | 4.123 | 5.114 | 62.678 |
| 196 <sup>12</sup> | FC(F)Oe(cc1)ccc1[C@]2(C(=O)N(C)C(=N2)N)c3ccc(cc3)[C@H](F)CCCF                           | 4.097 | 3.908 | 4.361 | 4.135 | 3.861 | 58.492 |
| 197 <sup>12</sup> | FC(F)Oe(cc1)ccc1[C@]2(C(=O)N(C)C(=N2)N)c3ccc(cc3)/C=C/CCF                               | 4.398 | 4.410 | 4.537 | 4.309 | 4.314 | 64.554 |
| 198 <sup>12</sup> | FC(F)Oe(cc1)ccc1[C@]2(C(=O)N(C)C(=N2)N)c3ccc(cc3)/C=C/CC(F)F                            | 4.523 | 4.385 | 4.339 | 4.296 | 4.318 | 62.817 |
| 199 <sup>12</sup> | FC(F)Oe(cc1)ccc1[C@]2(C(=O)N(C)C(=N2)N)c3ccc(cc3)/C=C/C4CC4                             | 4.046 | 4.323 | 4.682 | 4.303 | 4.279 | 54.348 |
| 200 <sup>12</sup> | FC(F)Oe(cc1)ccc1[C@]2(C(=O)N(C)C(=N2)N)c3ccc(cc3)/C(F)=C/C4CC4                          | 4.699 | 4.491 | 4.372 | 4.340 | 4.630 | 53.493 |
| 201 <sup>12</sup> | FC(F)Oe(cc1)ccc1[C@]2(C(=O)N(C)C(=N2)N)c3ccc(cc3)/C(F)=C4CC4                            | 3.268 | 2.658 | 2.639 | 4.340 | 3.404 | 56.021 |
| 202 <sup>12</sup> | FC(F)Oe(cc1)ccc1[C@]2(C(=O)N(C)C(=N2)N)c3ccc(cc3)/C=C/COC                               | 4.699 | 4.234 | 4.341 | 4.438 | 4.939 | 61.103 |
| 203 <sup>12</sup> | FC(F)Oe(cc1)ccc1[C@]2(C(=O)N(C)C(=N2)N)c3ccc(cc3)/C=C/CCOC                              | 4.699 | 4.189 | 4.896 | 4.337 | 4.362 | 55.530 |
| 204 <sup>12</sup> | FC(F)Oe(cc1)ccc1[C@]2(C(=O)N(C)C(=N2)N)c3ccc(cc3)/C=C/CCOC                              | 4.301 | 4.115 | 4.867 | 4.283 | 4.175 | 58.293 |
| 205 <sup>12</sup> | FC(F)Oe(cc1)ccc1[C@]2(C(=O)N(C)C(=N2)N)c3ccc(cc3)/C=C/CCO                               | 4.301 | 3.869 | 4.406 | 4.339 | 4.357 | 61.685 |
| 206 <sup>12</sup> | FC(F)Oe(cc1)ccc1[C@]2(C(=O)N(C)C(=N2)N)c3ccc(cc3)/C=C/CCCO                              | 4.398 | 4.477 | 4.435 | 4.290 | 5.396 | 57.601 |
| 207 <sup>12</sup> | FC(F)Oe(cc1)ccc1[C@]2(C(=O)N(C)C(=N2)N)c3ccc(C#C)ccc3                                   | 3.585 | 3.518 | 3.149 | 4.388 | 3.599 | 56.418 |
| 208 <sup>12</sup> | FC(F)Oe(cc1)ccc1[C@]2(C(=O)N(C)C(=N2)N)c3ccc(cc3)C#CC                                   | 4.699 | 4.469 | 4.250 | 4.413 | 4.625 | 64.559 |
| 209 <sup>12</sup> | FC(F)Oe(cc1)ccc1[C@]2(C(=O)N(C)C(=N2)N)c3ccc(cc3)C#CCC                                  | 4.398 | 4.530 | 4.544 | 4.399 | 4.622 | 59.274 |
| 210 <sup>12</sup> | CCCC#Cc(ccc1)ccc1[C@@]2(C(=O)N(C)C(=N2)N)c3ccc(cc3)OC(F)F                               | 4.523 | 4.494 | 4.172 | 4.406 | 4.071 | 61.652 |
| 211 <sup>12</sup> | FC(F)Oe(cc1)ccc1[C@]2(C(=O)N(C)C(=N2)N)c3ccc(cc3)C#CCF                                  | 5.000 | 4.281 | 4.455 | 4.405 | 4.669 | 61.140 |
| 212 <sup>12</sup> | FC(F)Oe(cc1)ccc1[C@]2(C(=O)N(C)C(=N2)N)c3ccc(cc3)C#CCCF                                 | 5.000 | 4.301 | 4.414 | 4.385 | 4.609 | 66.246 |
| 213 <sup>12</sup> | FC(F)Oe(cc1)ccc1[C@]2(C(=O)N(C)C(=N2)N)c3ccc(cc3)C#CCCCF                                | 4.398 | 4.373 | 4.804 | 4.423 | 4.622 | 60.802 |

|                   |                                                                                                                                          |       |       |       |       |       |        |
|-------------------|------------------------------------------------------------------------------------------------------------------------------------------|-------|-------|-------|-------|-------|--------|
| 214 <sup>12</sup> | FC(F)Oe(cc1)ccc1[C@]2(C(=O)N(C)C(=N2)N)c3cc(ccc3)C#CC(C)C                                                                                | 4.699 | 4.622 | 4.451 | 4.397 | 4.372 | 59.386 |
| 215 <sup>12</sup> | FC(F)Oe(cc1)ccc1[C@]2(C(=O)N(C)C(=N2)N)c3cc(ccc3)C#CC4CC4                                                                                | 4.699 | 4.888 | 4.736 | 4.421 | 4.625 | 61.621 |
| 216 <sup>12</sup> | FC(F)Oe(cc1)ccc1[C@]2(C(=O)N(C)C(=N2)N)c3cc(ccc3)C#CC4CCCC4                                                                              | 3.481 | 3.247 | 3.580 | 4.414 | 3.213 | 60.835 |
| 217 <sup>12</sup> | FC(F)Oe(cc1)ccc1[C@]2(C(=O)N(C)C(=N2)N)c3cc(ccc3)C#CCOC                                                                                  | 4.699 | 4.697 | 4.774 | 4.409 | 4.660 | 60.597 |
| 218 <sup>12</sup> | FC(F)Oe(cc1)ccc1[C@]2(C(=O)N(C)C(=N2)N)c3cc(ccc3)C#CCOC                                                                                  | 4.699 | 4.634 | 4.825 | 4.409 | 4.327 | 57.187 |
| 219 <sup>12</sup> | FC(F)Oe(cc1)ccc1[C@]2(C(=O)N(C)C(=N2)N)c3cc(ccc3)C#CCCO                                                                                  | 5.000 | 4.639 | 3.978 | 4.428 | 4.623 | 58.223 |
| 220 <sup>12</sup> | FC(F)Oe(cc1)ccc1[C@]2(C(=O)N(C)C(=N2)N)c3cc(ccc3)C#CCCCO                                                                                 | 5.000 | 4.626 | 4.761 | 4.422 | 4.640 | 60.445 |
| 221 <sup>12</sup> | FC(F)Oe(cc1)ccc1[C@]2(C(=O)N(C)C(=N2)N)c3cc(c(F)cc3)OCCF                                                                                 | 3.921 | 4.296 | 4.512 | 4.469 | 4.234 | 61.256 |
| 222 <sup>12</sup> | FC(F)Oe(cc1)ccc1[C@]2(C(=O)N(C)C(=N2)N)c3cc(c(F)cc3)OCCCF                                                                                | 5.000 | 4.399 | 4.467 | 4.462 | 5.107 | 63.807 |
| 223 <sup>12</sup> | FC(F)Oe(cc1)ccc1[C@]2(C(=O)N(C)C(=N2)N)c3cc(c(F)cc3)OCCCF                                                                                | 4.000 | 4.611 | 4.572 | 4.434 | 4.139 | 59.829 |
| 224 <sup>12</sup> | FC(F)Oe(cc1)ccc1[C@]2(C(=O)N(C)C(=N2)N)c3cc(ccc3)OCC(F)(F)F                                                                              | 3.699 | 4.470 | 4.378 | 4.300 | 3.344 | 53.677 |
| 225 <sup>12</sup> | FC(F)Oe(cc1)ccc1[C@]2(C(=O)N(C)C(=N2)N)c3cc(ccc3)OCC4CC4                                                                                 | 4.699 | 4.318 | 4.514 | 4.284 | 4.458 | 58.423 |
| 226 <sup>12</sup> | FC(F)Oe(cc1)ccc1[C@]2(C(=O)N(C)C(=N2)N)c3cc(OC(F)F)ccc3                                                                                  | 3.699 | 3.840 | 3.506 | 4.283 | 3.444 | 62.919 |
| 227 <sup>12</sup> | FC(F)Oe(cc1)ccc1[C@]2(C(=O)N(C)C(=N2)N)c3cc(ccc3)OCC(F)F                                                                                 | 4.523 | 3.626 | 3.876 | 4.407 | 4.258 | 57.888 |
| 228 <sup>12</sup> | FC(F)Oe(cc1)ccc1[C@]2(C(=O)N(C)C(=N2)N)c3cc(c(F)cc3)OCC(F)F                                                                              | 4.155 | 3.903 | 3.726 | 4.494 | 5.164 | 57.359 |
| 229 <sup>12</sup> | FC(F)Oe(cc1)ccc1[C@]2(C(=O)N(C)C(=N2)N)c3cc(ccc3)OCC(F)F                                                                                 | 5.000 | 4.332 | 4.480 | 4.340 | 5.422 | 60.944 |
| 230 <sup>12</sup> | FC(F)Oe(cc1)ccc1[C@]2(C(=O)N(C)C(=N2)N)c3cc(c(F)cc3)OCC=C(F)F                                                                            | 4.523 | 4.204 | 4.107 | 4.429 | 4.799 | 57.920 |
| 231 <sup>12</sup> | FC(F)Oe(cc1)ccc1[C@]2(C(=O)N(C)C(=N2)N)c3cc(ccc3)OCC=C(F)F                                                                               | 4.523 | 4.951 | 4.750 | 4.269 | 4.864 | 58.276 |
| 232 <sup>12</sup> | FC(F)Oe(cc1)c(C)ccc1[C@]2(C(=O)N(C)C(=N2)N)c3ccccc3                                                                                      | 4.097 | 3.731 | 3.894 | 4.175 | 4.508 | 58.696 |
| 233 <sup>12</sup> | FC(F)Oe(cc1)ccc1[C@]2(C(=O)N(C)C(=N2)N)c3cc(c(F)cc3)C#CC4CC4                                                                             | 4.699 | 4.223 | 4.524 | 4.544 | 4.137 | 57.999 |
| 234 <sup>12</sup> | FC(F)Oe(cc1)c(C)ccc1[C@]2(C(=O)N(C)C(=N2)N)c3cc(c(F)cc3)C#CC4CC4                                                                         | 4.699 | 4.926 | 4.909 | 4.714 | 4.101 | 54.683 |
| 235 <sup>12</sup> | FC(F)Oe(cc1)ccc1[C@]2(C(=O)N(C)C(=N2)N)c3cc(c(F)cc3)C#CCOC                                                                               | 4.921 | 4.490 | 4.628 | 4.523 | 4.861 | 68.460 |
| 236 <sup>12</sup> | FC(F)Oe(cc1)c(C)ccc1[C@]2(C(=O)N(C)C(=N2)N)c3cc(c(F)cc3)C#CCOC                                                                           | 4.886 | 4.591 | 4.657 | 4.694 | 4.916 | 68.713 |
| 237 <sup>12</sup> | FC(F)Oe(cc1)c(C)ccc1[C@]2(C(=O)N(C)C(=N2)N)c3cc(c(F)cc3)OCC(F)F                                                                          | 4.824 | 4.312 | 4.104 | 4.681 | 4.603 | 84.324 |
| 238 <sup>12</sup> | FC(F)Oe(cc1)c(C)ccc1[C@]2(C(=O)N(C)C(=N2)N)c3cc(ccc3)C#CC4CC4                                                                            | 4.658 | 4.657 | 4.719 | 4.588 | 4.544 | 91.882 |
| 239 <sup>12</sup> | FC(F)Oe(cc1)c(C)ccc1[C@]2(C(=O)N(C)C(=N2)N)c3cc(c(F)cc3)C#CCF                                                                            | 4.699 | 4.719 | 4.489 | 4.693 | 4.664 | 69.089 |
| 240 <sup>12</sup> | FC(F)Oe(cc1)c(C)ccc1[C@]2(C(=O)N(C)C(=N2)N)c3cc(c(F)cc3)C#CCCC                                                                           | 4.523 | 4.568 | 4.618 | 4.707 | 4.790 | 81.333 |
| 241 <sup>12</sup> | FC(F)Oe(cc1)c(C)ccc1[C@]2(C(=O)N(C)C(=N2)N)c3cc(ccc3)C#CCCC                                                                              | 4.854 | 4.865 | 4.708 | 4.574 | 4.559 | 28.650 |
| 242 <sup>12</sup> | FC(F)Oe(cc1)ccc1[C@]2(C(=O)N(C)C(=N2)N)c3cc(c(F)cc3)C#CC                                                                                 | 4.387 | 4.273 | 4.392 | 4.545 | 4.049 | 50.124 |
| 243 <sup>13</sup> | Oc1cc(O)ccc1O                                                                                                                            | 1.438 | 0.499 | 0.648 | 1.367 | 1.605 | 52.860 |
| 244 <sup>13</sup> | Oc1cc(O)cc(o2)c1oc(c23)cc(O)c4c3oc5e(o4)cc(O)cc5O                                                                                        | 2.272 | 1.390 | 1.601 | 2.304 | 3.057 | 48.604 |
| 245 <sup>13</sup> | c1e(O)cc(O)c(O2)c1Oe(c23)c(O)cc(O)c3Oe4cc(O)cc(e4)O                                                                                      | 1.914 | 2.158 | 1.712 | 2.163 | 1.840 | 50.417 |
| 246 <sup>13</sup> | c1e(O)cc(O)cc1Oe2c(O)cc(O)c(e23)Oe4c(O3)c(O)cc5e4e6c(o5)c(O)cc6(O)Oe7cc(O)cc(e7)O                                                        | 2.672 | 3.156 | 3.207 | 3.745 | 2.441 | 55.093 |
| 247 <sup>13</sup> | c1e(O)cc(O)cc1Oe2c(O)cc(O)c(e23)Oe4c(O3)c(O)cc(e4)Oe5c(O)cc(cc5O)Oe6c(O)cc(O)c(e67)Oe8c(O7)c(O)cc(e8)O                                   | 2.656 | 2.878 | 2.902 | 2.266 | 2.464 | 54.258 |
| 248 <sup>13</sup> | Oc1cc(O)cc(O)c1Oe2cc(O)cc(O)c2Oe3cc(O)cc(e3)O                                                                                            | 1.933 | 1.817 | 2.114 | 2.019 | 2.844 | 51.401 |
| 249 <sup>13</sup> | c1e(O)cc(O)cc1Oe2c(O)cc(O)c(e23)Oe4c(O3)c(O)cc(e4)Oe5c(O)cc(O)cc5O                                                                       | 2.066 | 2.653 | 1.995 | 2.624 | 2.165 | 54.306 |
| 250 <sup>14</sup> | n1[nH]nnc1-c(ccc2)cc2NC(=O)[C@H](O)[C@H](Cc3ccccc3)NC(=O)[C@H](CC4CC(C)C)NC(=O)[C@H](C(C)C)NC(=O)[C@@H](N)CNC(=O)c5[nH]c(=O)[nH]c(=O)c5F | 5.252 | 5.308 | 4.979 | 5.410 | 4.698 | 42.601 |
| 251 <sup>15</sup> | Fc1cc(F)cc(c1)C[C@H](NC(=O)C)[C@H](O)CNC2(CCCCC2)c3cccc(c3)C(C)C                                                                         | 4.328 | 3.570 | 4.247 | 3.746 | 4.204 | 45.868 |
| 252 <sup>15</sup> | Fc1cc(F)cc(c1)C[C@H](NC(=O)C)[C@H](O)CNC2(CCCCC2)c3cccc(c3)-n4cccn4                                                                      | 4.229 | 3.266 | 3.597 | 2.987 | 4.544 | 46.774 |
| 253 <sup>15</sup> | Fc1cc(F)cc(c1)C[C@H](NC(=O)C)[C@H](O)CNC2(COCC2)c3cccc(c3)C(C)C                                                                          | 4.215 | 3.203 | 4.103 | 3.318 | 4.503 | 45.476 |
| 254 <sup>15</sup> | Fc1cc(F)cc(c1)C[C@H](NC(=O)C)[C@H](O)CN[C@]2(COCC2)c3cccc(c3)-n4cccn4                                                                    | 3.569 | 3.036 | 3.702 | 3.115 | 3.518 | 45.029 |
| 255 <sup>15</sup> | Fc1cc(F)cc(c1)C[C@H](NC(=O)C)[C@H](O)CNC2(CCCC2)c3cccc(c3)C(C)C                                                                          | 3.658 | 3.195 | 3.467 | 3.721 | 3.028 | 49.149 |
| 256 <sup>15</sup> | Fc1cc(F)cc(c1)C[C@H](NC(=O)C)[C@H](O)CN[C@]2(COCC2)c3cccc(c3)-n4cccn4                                                                    | 2.620 | 2.743 | 2.967 | 2.925 | 2.438 | 47.748 |
| 257 <sup>15</sup> | Fc1cc(F)cc(c1)C[C@H](NC(=O)C)[C@H](O)CNC2(CNCC2)c3cccc(c3)C(C)C                                                                          | 2.328 | 2.335 | 2.087 | 2.684 | 2.756 | 43.893 |
| 258 <sup>15</sup> | Fc1cc(F)cc(c1)C[C@H](NC(=O)C)[C@H](O)CNC2(CCN(C2)C(=O)N)c3cccc(c3)C(C)C                                                                  | 3.420 | 4.100 | 3.674 | 3.456 | 3.197 | 44.953 |
| 259 <sup>15</sup> | Fc1cc(F)cc(c1)C[C@H](NC(=O)C)[C@H](O)CN[C@@]2(CC(=O)NCC2)c3cccc(c3)C(C)C                                                                 | 4.745 | 4.747 | 4.727 | 4.412 | 4.541 | 43.020 |



|                   |                                                                                                       |       |       |       |       |       |        |
|-------------------|-------------------------------------------------------------------------------------------------------|-------|-------|-------|-------|-------|--------|
| 260 <sup>15</sup> | <chem>Fc1cc(F)cc(c1)C[C@H](NC(=O)C)[C@H](O)CN[C@@]2(CC(=O)NCC2)c3cccc(c3)C(C)(C)C</chem>              | 4.721 | 4.722 | 4.649 | 4.412 | 4.312 | 37.405 |
| 261 <sup>15</sup> | <chem>Fc1cc(F)cc(c1)C[C@H](NC(=O)C)[C@H](O)CN[C@@]2(CN(O)CCC2)c3cccc(c3)C(C)(C)C</chem>               | 3.398 | 4.310 | 3.658 | 3.674 | 3.037 | 38.503 |
| 262 <sup>15</sup> | <chem>Fc1cc(F)cc(c1)C[C@H](NC(=O)C)[C@H](O)CN[C@@]2(c3cccc(c3)C(C)(C)C)CN(CCC2)C(=O)OCe4cccc4</chem>  | 3.066 | 3.975 | 3.993 | 4.178 | 3.524 | 44.454 |
| 263 <sup>15</sup> | <chem>Fc1cc(F)cc(c1)C[C@H](NC(=O)C)[C@H](O)CN[C@@]2(CN(C(=O)C)CC2)c3cccc(c3)C(C)(C)C</chem>           | 2.886 | 2.585 | 2.966 | 3.823 | 2.615 | 41.054 |
| 264 <sup>15</sup> | <chem>Fc1cc(F)cc(c1)C[C@H](NC(=O)C)[C@H](O)CN[C@@]2(CN(C(=O)N)CC2)c3cccc(c3)C(C)(C)C</chem>           | 3.481 | 3.508 | 3.797 | 3.920 | 3.634 | 46.150 |
| 265 <sup>15</sup> | <chem>Fc1cc(F)cc(c1)C[C@H](NC(=O)C)[C@H](O)CN[C@@]2(CNC(=O)CC2)c3cccc(c3)C(C)(C)C</chem>              | 4.328 | 4.204 | 3.963 | 3.833 | 4.160 | 41.542 |
| 266 <sup>15</sup> | <chem>Fc1cc(F)cc(c1)C[C@H](NC(=O)C)[C@H](O)CNC2(CCC(=O)CC2)c3cccc(c3)C(C)(C)C</chem>                  | 3.921 | 3.434 | 4.144 | 4.027 | 3.520 | 71.442 |
| 267 <sup>15</sup> | <chem>Fc1cc(F)cc(c1)C[C@H](NC(=O)C)[C@H](O)CN[C@@]2(CC[C@H](O)CC2)c3cccc(c3)C(C)(C)C</chem>           | 2.036 | 2.755 | 2.412 | 3.640 | 2.124 | 46.693 |
| 268 <sup>15</sup> | <chem>Fc1cc(F)cc(c1)C[C@H](NC(=O)C)[C@H](O)CN[C@@]2(CC[C@@H](O)CC2)c3cccc(c3)C(C)(C)C</chem>          | 4.620 | 4.035 | 4.469 | 3.640 | 4.996 | 51.018 |
| 269 <sup>15</sup> | <chem>Fc1cc(F)cc(c1)C[C@H](NC(=O)C)[C@H](O)CN[C@@]2(CC[C@H](CC2)CO)c3cccc(c3)C(C)(C)C</chem>          | 4.420 | 4.216 | 4.949 | 3.781 | 4.746 | 41.552 |
| 270 <sup>15</sup> | <chem>Fc1cc(F)cc(c1)C[C@H](NC(=O)C)[C@H](O)CNC2(CCC(=C)CC2)c3cccc(c3)C(C)(C)C</chem>                  | 4.319 | 4.687 | 4.534 | 4.106 | 4.867 | 41.981 |
| 271 <sup>15</sup> | <chem>Fc1cc(F)cc(c1)C[C@H](NC(=O)C)[C@H](O)CN[C@@]2(CC[C@@H](C)CC2)c3cccc(c3)C(C)(C)C</chem>          | 4.310 | 4.500 | 4.200 | 3.915 | 4.709 | 37.202 |
| 272 <sup>15</sup> | <chem>Fc1cc(F)cc(c1)C[C@H](NC(=O)C)[C@H](O)CN[C@@]2(CC[C@H](CC2)SC)c3cccc(c3)C(C)(C)C</chem>          | 4.620 | 4.136 | 4.208 | 3.980 | 4.481 | 42.139 |
| 273 <sup>15</sup> | <chem>Fc1cc(F)cc(c1)C[C@H](NC(=O)C)[C@H](O)CN[C@@]2(CC[C@@H](C(F)(F)F)CC2)c3cccc(c3)C(C)(C)C</chem>   | 4.481 | 4.188 | 4.372 | 3.538 | 4.904 | 48.727 |
| 274 <sup>15</sup> | <chem>Fc1cc(F)cc(c1)C[C@H](NC(=O)C)[C@H](O)CN[C@@]2(CC[C@H](CC2)OC)c3cccc(c3)C(C)(C)C</chem>          | 3.854 | 3.196 | 4.391 | 4.151 | 4.123 | 39.933 |
| 275 <sup>15</sup> | <chem>Fc1cc(F)cc(c1)C[C@H](NC(=O)C)[C@H](O)CN[C@@]2(CC[C@@H](C#N)CC2)c3cccc(c3)C(C)(C)C</chem>        | 3.420 | 3.810 | 3.189 | 3.761 | 3.912 | 45.929 |
| 276 <sup>15</sup> | <chem>Fc1cc(F)cc(c1)C[C@H](NC(=O)C)[C@H](O)CN[C@@]2(CC[C@H](CC2)S(=O)(=O)C)c3cccc(c3)C(C)(C)C</chem>  | 3.678 | 3.023 | 3.862 | 3.482 | 3.286 | 40.392 |
| 277 <sup>15</sup> | <chem>Fc1cc(F)cc(c1)C[C@H](NC(=O)C)[C@H](O)CN[C@@]2(CCC(CC2)=NO)c3cccc(c3)C(C)(C)C</chem>             | 5.056 | 4.482 | 5.036 | 4.607 | 5.398 | 41.317 |
| 278 <sup>15</sup> | <chem>Fc1cc(F)cc(c1)C[C@H](NC(=O)C)[C@H](O)CN[C@@]2(CC[C@H](CC2)NO)c3cccc(c3)C(C)(C)C</chem>          | 4.721 | 4.775 | 3.646 | 4.216 | 5.259 | 38.901 |
| 279 <sup>15</sup> | <chem>Fc1cc(F)cc(c1)C[C@H](NC(=O)C)[C@H](O)CN[C@@]2(CC[C@H](CC2)NOC)c3cccc(c3)C(C)(C)C</chem>         | 4.000 | 4.431 | 4.441 | 4.177 | 3.735 | 47.355 |
| 280 <sup>15</sup> | <chem>Fc1cc(F)cc(c1)C[C@H](NC(=O)C)[C@H](O)CN[C@@]2(c3cccc(c3)C(C)(C)C)CC[C@H](CC2)NC(=O)OC</chem>    | 3.620 | 3.594 | 3.591 | 3.883 | 3.394 | 49.615 |
| 281 <sup>15</sup> | <chem>Fc1cc(F)cc(c1)C[C@H](NC(=O)C)[C@H](O)CN[C@@]2(CC[C@H](CC2)NC=O)c3cccc(c3)C(C)(C)C</chem>        | 3.678 | 3.580 | 3.535 | 3.912 | 3.210 | 48.767 |
| 282 <sup>15</sup> | <chem>Fc1cc(F)cc(c1)C[C@H](NC(=O)C)[C@H](O)CN[C@@]2(CC[C@H](CC2)NS(=O)(=O)C)c3cccc(c3)C(C)(C)C</chem> | 3.398 | 4.392 | 3.861 | 4.402 | 3.670 | 66.477 |
| 283 <sup>15</sup> | <chem>Fc1cc(F)cc(c1)C[C@H](NC(=O)C)[C@H](O)CN[C@@]2(CC[C@H](CC2)N(O)C(=O)C)c3cccc(c3)C(C)(C)C</chem>  | 3.620 | 3.571 | 3.675 | 3.238 | 4.175 | 85.103 |
| 284 <sup>15</sup> | <chem>Fc1cc(F)cc(c1)C[C@H](NC(=O)C)[C@H](O)CN[C@@]2(CC[C@H](CC2)NC(=O)C)c3cccc(c3)C(C)(C)C</chem>     | 3.456 | 3.904 | 3.870 | 4.106 | 3.355 | 76.055 |
| 285 <sup>15</sup> | <chem>Fc1cc(F)cc(c1)C[C@H](NC(=O)C)[C@H](O)CN[C@@]2(c3cccc(c3)C(C)(C)C)CC[C@H](CC2)Nc4cccc4</chem>    | 4.137 | 4.048 | 4.330 | 3.951 | 4.452 | 80.425 |
| 286 <sup>15</sup> | <chem>Fc1cc(F)cc(c1)C[C@H](NC(=O)C)[C@H](O)CN[C@@]2(c3cccc(c3)C(C)(C)C)CC[C@H](CC2)Nc4scn4</chem>     | 4.071 | 4.258 | 3.303 | 3.874 | 4.127 | 79.019 |
| 287 <sup>15</sup> | <chem>Fc1cc(F)cc(c1)C[C@H](NC(=O)C)[C@H](O)CN[C@@]2(c3cccc(c3)C(C)(C)C)CC[C@H](CC2)Nc4ence4</chem>    | 3.301 | 3.038 | 4.274 | 3.910 | 3.266 | 76.560 |
| 288 <sup>15</sup> | <chem>Fc1cc(F)cc(c1)C[C@H](NC(=O)C)[C@H](O)CN[C@@](C2)(CCc(c23)n[nH]c3)c4cccc(c4)C(C)(C)C</chem>      | 4.921 | 4.354 | 4.644 | 4.716 | 5.116 | 73.606 |
| 289 <sup>15</sup> | <chem>Fc1cc(F)cc(c1)C[C@H](NC(=O)C)[C@H](O)CN[C@@](C2)(c3cccc(c3)C(C)(C)C)CCc(c24)nc(N)nc4</chem>     | 4.854 | 3.885 | 4.097 | 4.809 | 5.127 | 69.392 |
| 290 <sup>15</sup> | <chem>Fc1cc(F)cc(c1)C[C@H](NC(=O)C)[C@H](O)CN[C@@](C2)(c3cccc(c3)C(C)(C)C)CCc(c24)nc(C)nc4</chem>     | 4.032 | 4.686 | 4.298 | 5.200 | 5.065 | 65.303 |
| 291 <sup>16</sup> | <chem>c1cccc1C[C@H]([C@H](O)CNC2CC2)NC(=O)c(c3)cc(c4c35)c(C)cn4CCS(=O)(=O)N5C</chem>                  | 4.699 | 4.653 | 4.999 | 4.470 | 4.916 | 82.047 |
| 292 <sup>16</sup> | <chem>C1CCCC1NC(=O)[C@H](C)NC[C@@H](O)[C@H](Cc2cccc2)NC(=O)c3ccc(cc3)N(S(=O)(=O)C)c4cccc4</chem>      | 4.824 | 4.561 | 4.225 | 3.904 | 4.273 | 80.395 |

|                   |                                                                                                 |       |       |       |       |       |        |
|-------------------|-------------------------------------------------------------------------------------------------|-------|-------|-------|-------|-------|--------|
| 293 <sup>16</sup> | C1CCCCC1NC(=O)[C@H](C)NC[C@@H](O)[C@H](Cc2ccccc2)NC(=O)c3cc(c3)Nc4ccccc4                        | 2.201 | 2.730 | 2.831 | 3.011 | 2.793 | 66.770 |
| 294 <sup>16</sup> | C1CCCCC1NC(=O)[C@H](C)NC[C@@H](O)[C@H](Cc2ccccc2)NC(=O)c3cc(c3)N(C(=O)C)c4ccccc4                | 2.886 | 3.211 | 2.160 | 3.494 | 3.240 | 77.818 |
| 295 <sup>16</sup> | C1CCCCC1NC(=O)[C@H](C)NC[C@@H](O)[C@H](Cc2ccccc2)NC(=O)c3cc(c3)N(S(=O)(=O)C)C4CCCCC4            | 3.523 | 2.792 | 3.291 | 3.570 | 3.479 | 69.009 |
| 296 <sup>16</sup> | C1CCCCC1NC(=O)[C@H](C)NC[C@@H](O)[C@H](Cc2ccccc2)NC(=O)c3cc(c3)N(S(=O)(=O)C)C4c4ccccc4          | 3.745 | 3.701 | 3.916 | 2.921 | 3.659 | 77.863 |
| 297 <sup>16</sup> | C1CCCCC1NC(=O)[C@H](C)NC[C@@H](O)[C@H](Cc2ccccc2)NC(=O)c3cc(c3)NS(=O)(=O)c4ccccc4               | 2.102 | 2.417 | 2.287 | 2.885 | 2.583 | 74.844 |
| 298 <sup>16</sup> | C1CCCCC1NC(=O)[C@H](C)NC[C@@H](O)[C@H](Cc2ccccc2)NC(=O)c3cc(c3)NS(=O)(=O)C4c4ccccc4             | 2.260 | 2.977 | 2.667 | 3.079 | 3.729 | 78.770 |
| 299 <sup>16</sup> | C1CCCCC1NC(=O)[C@H](C)NC[C@@H](O)[C@H](Cc2ccccc2)NC(=O)c3cc(c3)OS(=O)(=O)C4c4ccccc4             | 1.886 | 2.451 | 2.726 | 2.074 | 1.716 | 73.518 |
| 300 <sup>16</sup> | C1CCCCC1NC(=O)[C@H](C)NC[C@@H](O)[C@H](Cc2ccccc2)NC(=O)c3cc(c3)CS(=O)(=O)c4ccccc4               | 1.357 | 1.643 | 2.244 | 1.730 | 1.556 | 69.344 |
| 301 <sup>16</sup> | C1CCCCC1NC(=O)[C@H](C)NC[C@@H](O)[C@H](Cc2ccccc2)NC(=O)c3cc(c3)S(=O)(=O)C4c4ccccc4              | 1.301 | 2.338 | 1.857 | 2.599 | 1.124 | 79.232 |
| 302 <sup>16</sup> | C1CCCCC1NC(=O)[C@H](C)NC[C@@H](O)[C@H](Cc2ccccc2)NC(=O)c3cc(c3)S(=O)(=O)N(C)C4c4ccccc4          | 1.387 | 3.996 | 2.048 | 2.162 | 1.337 | 81.052 |
| 303 <sup>16</sup> | FC(F)(F)c(c1)cccc1CNC[C@@H](O)[C@H](Cc2ccccc2)NC(=O)c3cc(c3)N(S(=O)(=O)C)c4ccccc4               | 4.638 | 4.520 | 4.728 | 4.425 | 4.836 | 69.981 |
| 304 <sup>16</sup> | C1CCCCC1NC(=O)[C@H](C)NC[C@@H](O)[C@H](Cc2ccccc2)NC(=O)c3cc(c3)N(S(=O)(=O)C)c4ccccc4OC          | 3.900 | 3.517 | 3.780 | 3.905 | 4.801 | 79.210 |
| 305 <sup>16</sup> | C1CCCCC1NC(=O)[C@H](C)NC[C@@H](O)[C@H](Cc2ccccc2)NC(=O)c3cc(c3)N(S(=O)(=O)C)c4ccccc4C#N         | 3.509 | 2.893 | 3.564 | 4.016 | 4.512 | 76.316 |
| 306 <sup>16</sup> | C1CCCCC1NC(=O)[C@H](C)NC[C@@H](O)[C@H](Cc2ccccc2)NC(=O)c3cc(c3)N(S(=O)(=O)C)c4cccc(c4)OC        | 4.745 | 5.122 | 5.176 | 4.006 | 4.584 | 76.728 |
| 307 <sup>16</sup> | C1CCCCC1NC(=O)[C@H](C)NC[C@@H](O)[C@H](Cc2ccccc2)NC(=O)c3cc(c3)N(S(=O)(=O)C)c4cccc(c4)C#N       | 5.097 | 4.943 | 4.619 | 4.663 | 5.393 | 77.592 |
| 308 <sup>16</sup> | C1CCCCC1NC(=O)[C@H](C)NC[C@@H](O)[C@H](Cc2ccccc2)NC(=O)c3cc(c3)N(S(=O)(=O)C)c4cccc(c4)OC        | 4.959 | 4.476 | 4.618 | 4.688 | 4.675 | 73.430 |
| 309 <sup>16</sup> | C1CCCCC1NC(=O)[C@H](C)NC[C@@H](O)[C@H](Cc2ccccc2)NC(=O)c3cc(c3)N(S(=O)(=O)C)c4ccc(C(F)(F)F)c4   | 4.699 | 4.608 | 4.436 | 3.951 | 4.657 | 80.166 |
| 310 <sup>16</sup> | C1CCCCC1NC(=O)[C@H](C)NC[C@@H](O)[C@H](Cc2ccccc2)NC(=O)c3cc(c3)N(S(=O)(=O)C)c4ccc(Cl)cc4        | 5.000 | 4.156 | 5.878 | 4.685 | 4.671 | 77.662 |
| 311 <sup>16</sup> | C1CCCCC1NC(=O)[C@H](C)NC[C@@H](O)[C@H](Cc2ccccc2)NC(=O)c3cc(c3)N(S(=O)(=O)C)c4ccc(C#N)cc4       | 3.721 | 3.839 | 3.501 | 3.807 | 3.982 | 77.650 |
| 312 <sup>16</sup> | C1CCCCC1NC(=O)[C@H](C)NC[C@@H](O)[C@H](Cc2ccccc2)NC(=O)c3cc(c3)N(S(=O)(=O)C)c4cc(Cl)cc(Cl)c4    | 4.959 | 4.589 | 4.403 | 3.915 | 4.840 | 78.996 |
| 313 <sup>16</sup> | FC(F)(F)c(c1)cccc1CNC[C@@H](O)[C@H](Cc2ccccc2)NC(=O)c3cc(c3)N(S(=O)(=O)C)N(S(=O)(=O)C)c45ccccc5 | 3.041 | 3.152 | 3.208 | 2.629 | 2.861 | 79.451 |
| 314 <sup>16</sup> | FC(F)(F)c(c1)cccc1CNC[C@@H](O)[C@H](Cc2ccccc2)NC(=O)c3cc(c3)N(S(=O)(=O)C)c4cccn4                | 3.538 | 3.573 | 4.399 | 4.004 | 3.799 | 80.001 |
| 315 <sup>16</sup> | FC(F)(F)c(c1)cccc1CNC[C@@H](O)[C@H](Cc2ccccc2)NC(=O)c3cc(c3)N(S(=O)(=O)C)c4ccncc4               | 4.602 | 4.427 | 4.579 | 4.284 | 4.886 | 69.181 |
| 316 <sup>16</sup> | FC(F)(F)c(c1)cccc1CNC[C@@H](O)[C@H](Cc2ccccc2)NC(=O)c3cc(c3)N(S(=O)(=O)C)c4ccncc4               | 3.678 | 4.228 | 4.719 | 3.655 | 4.825 | 68.228 |
| 317 <sup>16</sup> | FC(F)(F)c(c1)cccc1CNC[C@@H](O)[C@H](Cc2ccccc2)NC(=O)c3c(C)c(c3)N(S(=O)(=O)C)c4ccncc4            | 4.585 | 4.499 | 4.313 | 3.922 | 4.343 | 69.500 |
| 318 <sup>16</sup> | FC(F)(F)c(c1)cccc1CNC[C@@H](O)[C@H](Cc2ccccc2)NC(=O)c3cc(c3)N(S(=O)(=O)C)c4ccncc4               | 3.032 | 3.272 | 2.910 | 3.753 | 2.867 | 79.453 |
| 319 <sup>16</sup> | FC(F)(F)c(c1)cccc1CNC[C@@H](O)[C@H](Cc2ccccc2)NC(=O)c3cc(c3)N(S(=O)(=O)C)c4ccncc4               | 2.460 | 2.708 | 2.514 | 3.578 | 2.711 | 85.255 |
| 320 <sup>16</sup> | FC(F)(F)c(c1)cccc1CNC[C@@H](O)[C@H](Cc2ccccc2)NC(=O)c3nc(c3)N(S(=O)(=O)C)c4ccncc4               | 2.440 | 2.806 | 3.074 | 2.458 | 2.859 | 67.018 |
| 321 <sup>16</sup> | FC(F)(F)c(c1)cccc1CNC[C@@H](O)[C@H](Cc2ccccc2)NC(=O)c3cc(ncc3)N(S(=O)(=O)C)c4ccncc4             | 4.824 | 4.516 | 4.430 | 4.395 | 4.731 | 70.287 |
| 322 <sup>16</sup> | FC(F)(F)c(c1)cccc1CNC[C@@H](O)[C@H](Cc2ccccc2)NC(=O)c3cc(ene3)N(S(=O)(=O)C)c4ccncc4             | 4.678 | 4.046 | 4.360 | 3.764 | 4.894 | 69.434 |
| 323 <sup>16</sup> | FC(F)(F)c(c1)cccc1CNC[C@@H](O)[C@H](Cc2ccccc2)NC(=O)c3cc(cen3)N(S(=O)(=O)C)c4ccncc4             | 2.340 | 2.450 | 2.974 | 2.292 | 2.853 | 74.855 |
| 324 <sup>16</sup> | C1CCCCC1NC(=O)[C@H](C)NC[C@@H](O)[C@H](Cc2ccccc2)NC(=O)c3cc(cc3)NCCN4C(=O)CCC4                  | 4.886 | 4.333 | 4.346 | 3.731 | 5.015 | 71.559 |
| 325 <sup>16</sup> | C1CCCCC1NC(=O)[C@H](C)NC[C@@H](O)[C@H](Cc2ccccc2)NC(=O)c3cc(cc3)NCCN(S(=O)(=O)C)c4ccccc4        | 5.523 | 5.554 | 4.726 | 4.566 | 5.220 | 68.715 |

|                   |                                                                                                                   |       |       |       |       |       |        |
|-------------------|-------------------------------------------------------------------------------------------------------------------|-------|-------|-------|-------|-------|--------|
| 326 <sup>16</sup> | FC(F)(F)c(c1)cccc1CNC[C@@H](O)[C@H](Cc2ccccc2)NC(=O)c3ccc(cc3)OCC)N(S(=O)(=O)C)c4cccc4                            | 5.523 | 5.336 | 5.513 | 4.939 | 5.419 | 61.012 |
| 327 <sup>16</sup> | FC(F)(F)c(c1)cccc1CNC[C@@H](O)[C@H](Cc2ccccc2)NC(=O)c3ccc(cc3)C(C)C)N(S(=O)(=O)C)c4cccc4                          | 5.301 | 4.902 | 5.092 | 4.539 | 5.322 | 51.708 |
| 328 <sup>16</sup> | FC(F)(F)c(c1)cccc1CNC[C@@H](O)[C@H](Cc2ccccc2)NC(=O)c3ccc(N(S(=O)(=O)C)c4cccc4)cc(c3)-c5cccc5                     | 4.886 | 4.778 | 5.262 | 4.269 | 4.308 | 64.923 |
| 329 <sup>16</sup> | FC(F)(F)c(c1)cccc1CNC[C@@H](O)[C@H](Cc2ccccc2)NC(=O)c3ccc(cc3)N4C(=O)CCC4)N(S(=O)(=O)C)c5cccc5                    | 5.222 | 5.807 | 5.356 | 5.972 | 5.102 | 72.702 |
| 330 <sup>16</sup> | FC(F)(F)c(c1)cccc1CNC[C@@H](O)[C@H](Cc2ccccc2)NC(=O)c3ccc(cc3)S(=O)(=O)CC)N(S(=O)(=O)C)c4cccc4                    | 4.854 | 4.980 | 4.693 | 4.372 | 4.332 | 70.107 |
| 331 <sup>16</sup> | CC(C)CCC[C@@H](C)NC[C@@H](O)[C@H](Cc1ccccc1)NC(=O)c2ccc(cc2)N(S(=O)(=O)C)c3cccc3                                  | 4.495 | 3.993 | 4.156 | 3.695 | 4.314 | 69.280 |
| 332 <sup>16</sup> | C1CCCCC1NC[C@@H](O)[C@H](Cc2ccccc2)NC(=O)c3ccc(cc3)N(S(=O)(=O)C)c4cccc4                                           | 3.614 | 3.772 | 3.918 | 3.719 | 3.481 | 70.462 |
| 333 <sup>16</sup> | c1cccc1C[C@@H]([C@H](O)C)N2C2)NC(=O)c3ccc(cc3)N(S(=O)(=O)C)c4cccc4                                                | 3.357 | 3.976 | 3.732 | 3.500 | 3.751 | 63.938 |
| 334 <sup>17</sup> | C1CCCN[C@H]1[C@@H](O)[C@H](C[C@@H]2C=C(F)C=C(F)C2)NC(=O)c3ccc(C)cc(c3)C(=O)N(CCC)CCC                              | 3.886 | 3.798 | 4.148 | 3.900 | 4.174 | 65.574 |
| 335 <sup>17</sup> | CCCN(CCC)C(=O)c(c1)ccc(C)cc1C(=O)N[C@@H](C[C@@H]2C=C(F)C=C(F)C2)[C@H](O)[C@@H]3NCC[C@H](C3)Cc4cccc4               | 4.854 | 4.893 | 4.595 | 4.187 | 4.345 | 56.741 |
| 336 <sup>17</sup> | CCCN(CCC)C(=O)c(c1)ccc(C)cc1C(=O)N[C@@H](C[C@@H]2C=C(F)C=C(F)C2)[C@H](O)[C@@H]3NCC[C@H](C3)OCC                    | 5.155 | 4.615 | 4.365 | 4.148 | 5.315 | 69.310 |
| 337 <sup>17</sup> | CCCN(CCC)C(=O)c(c1)ccc(C)cc1C(=O)N[C@@H](C[C@@H]2C=C(F)C=C(F)C2)[C@H](O)[C@@H]3NCCN(C3=O)Cc4cccc4                 | 5.523 | 5.630 | 4.682 | 4.981 | 5.162 | 74.025 |
| 338 <sup>17</sup> | C1CC[C@H](COC)N1C(=O)c(c2)ccc(C)cc2C(=O)N[C@@H](C[C@@H]3C=C(F)C=C(F)C3)[C@H](O)[C@@H]4NCCN(C4=O)Cc5cccc5          | 6.000 | 4.953 | 5.315 | 5.787 | 5.677 | 68.945 |
| 339 <sup>17</sup> | C1CC[C@H](COC)N1C(=O)c(c2)ccc(OC)cc2C(=O)N[C@@H](C[C@@H]3C=C(F)C=C(F)C3)[C@H](O)[C@@H]4NCCN(C4=O)Cc5cccc5         | 5.398 | 5.429 | 5.388 | 5.909 | 4.989 | 68.488 |
| 340 <sup>17</sup> | C1CC[C@H](COC)N1C(=O)c(c2)ccc2C(=O)N[C@@H](C[C@@H]3C=C(F)C=C(F)C3)[C@H](O)[C@@H]4NCCN(C4=O)Cc5cccc5               | 5.699 | 4.548 | 4.800 | 4.575 | 5.386 | 63.555 |
| 341 <sup>17</sup> | CCCN(C1)C(=O)C[C@@H]1C(=O)N[C@@H](C[C@@H]2C=C(F)C=C(F)C2)[C@H](O)[C@@H]3NCCN(C3=O)Cc4cccc4                        | 5.046 | 4.708 | 4.740 | 4.897 | 5.497 | 63.015 |
| 342 <sup>17</sup> | CCCN(C1)C(=O)C[C@@H]1C(=O)N[C@@H](C[C@@H]2C=C(F)C=C(F)C2)[C@H](O)[C@@H]3NCCN(C3=O)Cc4cccc4                        | 5.301 | 4.143 | 5.107 | 5.008 | 5.891 | 71.797 |
| 343 <sup>17</sup> | CCCN(C1)C(=O)C[C@@H](CC)[C@H]1C(=O)N[C@@H](C[C@@H]2C=C(F)C=C(F)C2)[C@H](O)[C@@H]3NCCN(C3=O)Cc4cccc4               | 5.523 | 4.401 | 5.240 | 4.250 | 4.997 | 68.261 |
| 344 <sup>17</sup> | C1=CC=CC[C@@H]1C[C@@H](C(=O)N(C2)CCCC)[C@H]2C(=O)N[C@@H](C[C@@H]3C=C(F)C=C(F)C3)[C@H](O)[C@@H]4NCCN(C4=O)Cc5cccc5 | 4.796 | 4.488 | 4.807 | 4.455 | 4.860 | 64.718 |
| 345 <sup>17</sup> | C1CC1CN(C2)C(=O)C[C@@H]2C(=O)N[C@@H](C[C@@H]3C=C(F)C=C(F)C3)[C@H](O)[C@@H]4NCCN(C4=O)Cc5cccc5                     | 5.000 | 4.997 | 5.117 | 4.245 | 4.931 | 55.498 |
| 346 <sup>17</sup> | C1=CC=CC[C@@H]1CN(C2)C(=O)C[C@@H]2C(=O)N[C@@H](C[C@@H]3C=C(F)C=C(F)C3)[C@H](O)[C@@H]4NCCN(C4=O)Cc5cccc5           | 4.658 | 4.571 | 4.361 | 3.975 | 4.758 | 46.806 |
| 347 <sup>17</sup> | COCCN(C1)C(=O)C[C@@H]1C(=O)N[C@@H](C[C@@H]2C=C(F)C=C(F)C2)[C@H](O)[C@@H]3NCCN(C3=O)Cc4cccc4                       | 4.886 | 4.413 | 4.798 | 4.020 | 5.898 | 54.270 |
| 348 <sup>17</sup> | CCCN(C1)C(=O)N(CC)[C@H]1C(=O)N[C@@H](C[C@@H]2C=C(F)C=C(F)C2)[C@H](O)[C@@H]3NCCN(C3=O)Cc4cccc4                     | 5.046 | 4.195 | 4.543 | 4.920 | 4.956 | 60.689 |
| 349 <sup>17</sup> | CCCN(C1)C(=O)N(C)C(C)[C@H]1C(=O)N[C@@H](C[C@@H]2C=C(F)C=C(F)C2)[C@H](O)[C@@H]3NCCN(C3=O)Cc4cccc4                  | 4.959 | 5.075 | 4.084 | 5.273 | 5.931 | 82.016 |
| 350 <sup>17</sup> | CCCN(C1)C(=O)N(CCC)CC1C(=O)N[C@@H](C[C@@H]2C=C(F)C=C(F)C2)[C@H](O)[C@@H]3NCCN(C3=O)Cc4cccc4                       | 4.658 | 4.754 | 4.382 | 4.997 | 4.336 | 60.638 |
| 351 <sup>17</sup> | CCCN(CCC)C(=O)c(c1)ccc(C)cc1C(=O)N[C@@H]([C@H](O)[C@@H]2NCCN2=O)C[C@@H]3C=C(F)C=C(F)C3                            | 3.578 | 4.222 | 4.015 | 4.363 | 3.439 | 65.561 |
| 352 <sup>17</sup> | CCCN(CCC)C(=O)c(c1)ccc(C)cc1C(=O)N[C@@H]([C@H](O)[C@@H]2NCCN(C2=O)C)C[C@@H]3C=C(F)C=C(F)C3                        | 3.629 | 2.946 | 2.565 | 4.435 | 3.734 | 60.183 |
| 353 <sup>17</sup> | CCCN(CCC)C(=O)c(c1)ccc(C)cc1C(=O)N[C@@H](C[C@@H]2C=C(F)C=C(F)C2)[C@H](O)[C@@H]3NCCN(C3=O)CC                       | 3.757 | 3.680 | 4.144 | 4.549 | 4.086 | 67.011 |
| 354 <sup>17</sup> | CCCN(CCC)C(=O)c(c1)ccc(C)cc1C(=O)N[C@@H](C[C@@H]2C=C(F)C=C(F)C2)[C@H](O)[C@@H]3NCCN(C3=O)CCC                      | 4.357 | 4.590 | 4.543 | 4.515 | 4.869 | 69.794 |
| 355 <sup>17</sup> | CCCN(CCC)C(=O)c(c1)ccc(C)cc1C(=O)N[C@@H](C[C@@H]2C=C(F)C=C(F)C2)[C@H](O)[C@@H]3NCCN(C3=O)CC(C)C                   | 4.886 | 4.885 | 4.867 | 4.504 | 4.842 | 65.724 |
| 356 <sup>17</sup> | CCCN(CCC)C(=O)c(c1)ccc(C)cc1C(=O)N[C@@H](C[C@@H]2C=C(F)C=C(F)C2)[C@H](O)[C@@H]3NCCN(C3=O)CC4CC4                   | 5.000 | 4.993 | 4.452 | 4.533 | 5.488 | 70.759 |
| 357 <sup>17</sup> | CCCN(CCC)C(=O)c(c1)ccc(C)cc1C(=O)N[C@@H](C[C@@H]2C=C(F)C=C(F)C2)[C@H](O)[C@@H]3NCCN(C3=O)Cc4c(OC)cccc4            | 5.301 | 4.468 | 5.047 | 4.706 | 5.421 | 51.744 |
|                   | CCCN(CCC)C(=O)c(c1)ccc(C)cc1C(=O)N[C@@H](C[C@@H]2C=C(F)C=C(F)C2)[C@H](O)[C@@H]3NCCN(C3=O)Cc4c(OC)cccc4            | 4.600 | 4.648 | 3.658 | 4.702 | 4.255 | 42.246 |

|                   |                                                                                                                                     |       |       |       |       |       |        |  |  |
|-------------------|-------------------------------------------------------------------------------------------------------------------------------------|-------|-------|-------|-------|-------|--------|--|--|
|                   | <chem>=C(F)C2)C@H](O)[C@@H]3NCCN(C3=O)Cc4c(C#N)cccc4</chem>                                                                         |       |       |       |       |       |        |  |  |
| 359 <sup>17</sup> | <chem>CCCN(CCC)C(=O)c(c1)cc(C)cc1C(=O)N[C@@H](C[C@@H]2C=C(F)C=C(F)C2)C@H](O)[C@@H]3NCCN(C3=O)Cc4c(Cl)cccc4</chem>                   | 4.569 | 4.806 | 4.910 | 4.976 | 4.494 | 45.245 |  |  |
| 360 <sup>17</sup> | <chem>CCCN(CCC)C(=O)c(c1)cc(C)cc1C(=O)N[C@@H](C[C@@H]2C=C(F)C=C(F)C2)C@H](O)[C@@H]3NCCN(C3=O)c4cccc4</chem>                         | 3.462 | 3.322 | 3.391 | 4.291 | 3.785 | 60.428 |  |  |
| 361 <sup>17</sup> | <chem>CCCN(CCC)C(=O)c(c1)cc(C)cc1C(=O)N[C@@H](C[C@@H]2C=C(F)C=C(F)C2)C@H](O)[C@@H]3NCCN(C3=O)Cc4cccc4</chem>                        | 5.301 | 4.572 | 5.101 | 4.779 | 5.743 | 59.649 |  |  |
| 362 <sup>17</sup> | <chem>C1CC[C@H](COC)N1C(=O)c(c2)cc(C)cc2C(=O)N[C@@H](C[C@@H]3C=C(F)C=C(F)C3)C@H](O)[C@@H]4NCN(C4=O)Cc5cccc5</chem>                  | 5.699 | 5.765 | 5.132 | 5.586 | 6.712 | 64.053 |  |  |
| 363 <sup>17</sup> | <chem>CCCN(C1)C(=O)C[C@@H]1C(=O)N[C@@H](C[C@@H]2C=C(F)C=C(F)C2)C@H](O)[C@@H]3NCCN(C3=O)Cc4cccc4</chem>                              | 3.043 | 2.877 | 3.010 | 3.256 | 2.852 | 66.154 |  |  |
| 364 <sup>17</sup> | <chem>CCCN(C1)C(=O)C[C@@H]1C(=O)N[C@@H](C[C@@H]2C=C(F)C=C(F)C2)C@H](O)[C@@H]3NCCN(C3=O)Cc4cccc4</chem>                              | 3.854 | 3.521 | 3.638 | 3.368 | 3.322 | 65.615 |  |  |
| 365 <sup>17</sup> | <chem>CCCN(C1)C(=O)[C@H](CC)[C@H]1C(=O)N[C@@H](C[C@@H]2C=C(F)C=C(F)C2)C@H](O)[C@@H]3NCCN(C3=O)Cc4cccc4</chem>                       | 4.056 | 4.013 | 4.752 | 3.575 | 4.222 | 62.962 |  |  |
| 366 <sup>18</sup> | <chem>Fc1ccc(cc1)[C@@H](C)NC(=O)c2cc(cc2)N(C)S(=O)(=O)C)NC(=O)[C@@](O)(Cc3cccc3)CCC(=O)N[C@@H](C(C)C)C(=O)NC4cccc4</chem>           | 2.229 | 2.722 | 3.090 | 3.169 | 2.677 | 66.167 |  |  |
| 367 <sup>18</sup> | <chem>c1cccc1[C@@H](C)NC(=O)c2cc(cc2)N(C)S(=O)(=O)C)NC(=O)[C@@](O)(Cc3cccc3)CCC(=O)N[C@@H](C(C)C)C(=O)NC4cccc4</chem>               | 2.252 | 2.466 | 2.992 | 3.830 | 2.690 | 57.166 |  |  |
| 368 <sup>18</sup> | <chem>Fc1ccc(cc1)[C@@H](C)NC(=O)c2cc(cc2)N(C)S(=O)(=O)C)NC(=O)[C@@](O)(Cc3cccc3)CCC(=O)N[C@@H](C(C)C)C(=O)NC4ccc(cc4)C(=O)OC</chem> | 2.398 | 2.798 | 2.435 | 2.456 | 2.151 | 41.580 |  |  |
| 369 <sup>19</sup> | <chem>Fc1cc(F)cc(c1)C[C@H](NC(=O)C)[C@H](O)CN[C@H]2C[C@H](CCC2)c3cccc(c3)C(C)C</chem>                                               | 4.328 | 4.158 | 4.057 | 4.886 | 4.256 | 58.006 |  |  |
| 370 <sup>19</sup> | <chem>Fc1cc(F)cc(c1)C[C@H](NC(=O)C)[C@H](O)CN[C@H]2C[C@H](COC2)c3cccc(c3)C(C)C</chem>                                               | 4.215 | 3.213 | 3.433 | 3.881 | 5.216 | 58.866 |  |  |
| 371 <sup>19</sup> | <chem>Fc1cc(F)cc(c1)C[C@H](NC(=O)C)[C@H](O)CN[C@H]2C[C@H](CCC2)c3nncn(c3)C(C)C</chem>                                               | 2.620 | 2.644 | 2.485 | 2.909 | 2.338 | 70.279 |  |  |
| 372 <sup>19</sup> | <chem>Fc1cc(F)cc(c1)C[C@H](NC(=O)C)[C@H](O)CN[C@H]2C[C@H](CCC2)c3cccc(c3)-n4nccc4</chem>                                            | 4.229 | 3.761 | 4.408 | 4.586 | 4.033 | 67.745 |  |  |
| 373 <sup>19</sup> | <chem>Fc1cc(F)cc(c1)C[C@H](NC(=O)C)[C@H](O)CN[C@H]2C[C@H](CCC2)c3cccc(c3)[C@@H]4COCC4</chem>                                        | 4.056 | 3.583 | 3.472 | 3.844 | 4.138 | 63.195 |  |  |
| 374 <sup>19</sup> | <chem>Fc1cc(F)cc(c1)C[C@H](NC(=O)C)[C@H](O)CN[C@H]2C[C@H](COC2)c3cccc(c3)-n4nccc4</chem>                                            | 3.959 | 3.800 | 3.400 | 3.731 | 4.066 | 59.628 |  |  |
| 375 <sup>19</sup> | <chem>Fc1cc(F)cc(c1)C[C@H](NC(=O)C)[C@H](O)CN[C@H]2C[C@H](COC2)c3cccc(c3)[C@H]4COCC4</chem>                                         | 3.538 | 3.955 | 2.892 | 2.870 | 4.087 | 61.059 |  |  |
| 376 <sup>19</sup> | <chem>Fc1cc(F)cc(c1)C[C@H](NC(=O)C)[C@H](O)CNCc2cccc(c2)C(C)C</chem>                                                                | 2.886 | 2.950 | 2.970 | 2.373 | 2.271 | 59.369 |  |  |
| 377 <sup>19</sup> | <chem>Fc1cc(F)cc(c1)C[C@H](NC(=O)C)[C@H](O)CNC(C)C)c2cccc(c2)C(C)C</chem>                                                           | 3.699 | 2.929 | 2.731 | 2.952 | 3.311 | 47.216 |  |  |
| 378 <sup>19</sup> | <chem>Fc1cc(F)cc(c1)C[C@H](NC(=O)C)[C@H](O)CNC2(CC2)c3cccc(c3)C(C)C</chem>                                                          | 3.854 | 3.792 | 3.173 | 3.713 | 3.963 | 55.600 |  |  |
| 379 <sup>19</sup> | <chem>Fc1cc(F)cc(c1)C[C@H](NC(=O)C)[C@H](O)CNC2(CC2)c3cnn(c3)CC(C)C</chem>                                                          | 3.456 | 2.980 | 2.856 | 3.183 | 3.811 | 64.542 |  |  |
| 380 <sup>19</sup> | <chem>Fc1cc(F)cc(c1)C[C@H](NC(=O)C)[C@H](O)CNC2(CC2)c3cccc(c3)-n4cccn4</chem>                                                       | 3.009 | 2.954 | 2.787 | 2.973 | 2.795 | 67.485 |  |  |
| 381 <sup>19</sup> | <chem>Fc1cc(F)cc(c1)C[C@H](NC(=O)C)[C@H](O)CNC2(CC2)c3cccc(c3)[C@@H]4CCOC4</chem>                                                   | 3.119 | 1.719 | 2.666 | 3.718 | 2.666 | 66.275 |  |  |
| 382 <sup>19</sup> | <chem>Fc1cc(F)cc(c1)C[C@H](NC(=O)C)[C@H](O)CNC2(CC2)c3cccc(c3)C(=C)C(F)F</chem>                                                     | 2.886 | 2.829 | 3.000 | 3.062 | 3.156 | 66.367 |  |  |
| 383 <sup>19</sup> | <chem>Fc1cc(F)cc(c1)C[C@H](NC(=O)C)[C@H](O)CNC2(CC2)c3cccc(c3)C(C)C</chem>                                                          | 3.538 | 2.754 | 3.307 | 3.648 | 3.223 | 62.356 |  |  |
| 384 <sup>19</sup> | <chem>Fc1cc(F)cc(c1)C[C@H](NC(=O)C)[C@H](O)CNC2(CC2)c3cccc(c3)C(C)F)C</chem>                                                        | 3.638 | 2.712 | 3.473 | 3.581 | 3.327 | 63.550 |  |  |
| 385 <sup>19</sup> | <chem>Fc1cc(F)cc(c1)C[C@H](NC(=O)C)[C@H](O)CNC2(CC2)c3cccc(c3)C(C)F)CF</chem>                                                       | 3.409 | 3.181 | 3.789 | 3.564 | 3.468 | 65.377 |  |  |
| 386 <sup>19</sup> | <chem>Fc1cc(F)cc(c1)C[C@H](NC(=O)C)[C@H](O)CNC2(CCC2)c3cccc(c3)C(C)C</chem>                                                         | 3.215 | 2.738 | 2.801 | 3.772 | 3.488 | 70.034 |  |  |
| 387 <sup>19</sup> | <chem>Fc1cc(F)cc(c1)C[C@H](NC(=O)C)[C@H](O)CN[C@]2([C@@H](C2)C)c3cccc(c3)C(C)F)C</chem>                                             | 2.770 | 3.286 | 2.824 | 2.893 | 3.075 | 74.665 |  |  |
| 388 <sup>20</sup> | <chem>c1cccc1-c2n(CC(=O)N/C(N)=N/[H])c(cc2)-c3ccc(cc3)NC(=O)c4cc(Br)ccc4</chem>                                                     | 3.222 | 3.708 | 3.743 | 3.045 | 4.172 | 51.359 |  |  |
| 389 <sup>20</sup> | <chem>c1ccoc1C(=O)Nc2cccc(c2)[C@@]3(C(=O)N(C)C(=N3)N)C4CCCC4</chem>                                                                 | 4.000 | 3.295 | 4.814 | 3.059 | 3.962 | 64.657 |  |  |
| 390 <sup>20</sup> | <chem>Cc1ccoc1C(=O)Nc2cccc(c2)[C@@]3(C(=O)N(C)C(=N3)N)C4CCCC4</chem>                                                                | 4.398 | 4.066 | 4.018 | 4.080 | 3.991 | 71.210 |  |  |
| 391 <sup>20</sup> | <chem>c1ccn(C)c1C(=O)Nc2cccc(c2)[C@@]3(C(=O)N(C)C(=N3)N)C4CCCC4</chem>                                                              | 3.066 | 2.952 | 3.760 | 2.737 | 2.774 | 53.932 |  |  |
| 392 <sup>20</sup> | <chem>CCCC(=O)Nc1cccc(c1)[C@@]2(C(=O)N(C)C(=N2)N)C3CCCC3</chem>                                                                     | 2.545 | 2.521 | 2.805 | 2.676 | 2.576 | 56.095 |  |  |
| 393 <sup>20</sup> | <chem>COCC(=O)Nc1cccc(c1)[C@@]2(C(=O)N(C)C(=N2)N)C3CCCC3</chem>                                                                     | 3.678 | 3.125 | 3.282 | 3.582 | 3.898 | 55.700 |  |  |

|                   |                                                                                               |       |       |       |       |       |        |
|-------------------|-----------------------------------------------------------------------------------------------|-------|-------|-------|-------|-------|--------|
| 394 <sup>20</sup> | COCCC(=O)Ne1cccc(e1)[C@@]2(C(=O)N(C)C(=N2)N)C3CCCCC3                                          | 2.105 | 2.854 | 2.939 | 2.727 | 1.820 | 54.137 |
| 395 <sup>20</sup> | COc(e1)cccc1C(=O)Ne2cccc(e2)[C@@]3(C(=O)N(C)C(=N3)N)C4CCCCC4                                  | 2.866 | 2.830 | 2.995 | 3.195 | 2.407 | 76.921 |
| 396 <sup>20</sup> | O1COc(e12)cc(cc2)C(=O)Ne3cccc(e3)[C@@]4(C(=O)N(C)C(=N4)N)C5CCCCC5                             | 3.420 | 3.473 | 2.948 | 3.494 | 3.150 | 72.359 |
| 397 <sup>20</sup> | c1cccc1[C@]2(C3CCCCC3)C(=O)N(C(=N2)N)CCCCC                                                    | 2.857 | 2.409 | 2.863 | 2.466 | 2.966 | 51.188 |
| 398 <sup>20</sup> | c1cccc1[C@]2(C3CCCCC3)C(=O)N(C(=N2)N)CCCCC(=O)O                                               | 3.022 | 2.677 | 2.935 | 2.467 | 3.182 | 52.756 |
| 399 <sup>20</sup> | c1cccc1[C@]2(C3CCCCC3)C(=O)N(C(=N2)N)C[C@H]4CC[C@H](CC4)C(=O)O                                | 3.409 | 3.061 | 3.397 | 2.679 | 3.309 | 57.706 |
| 400 <sup>20</sup> | c1cccc1[C@]2(C3CCCCC3)C(=O)N(C(=N2)N)Cc4cccc4                                                 | 2.907 | 2.439 | 2.928 | 2.919 | 3.243 | 61.498 |
| 401 <sup>20</sup> | c1cccc1[C@]2(C3CCCCC3)C(=O)N(C(=N2)N)Cc4cc(F)cc(F)c4                                          | 2.967 | 2.341 | 2.988 | 3.022 | 3.255 | 60.241 |
| 402 <sup>20</sup> | c1cccc1[C@]2(C3CCCCC3)C(=O)N(C(=N2)N)C[C@H]4CCCO4                                             | 2.983 | 2.858 | 2.966 | 2.517 | 3.182 | 61.917 |
| 403 <sup>21</sup> | c12cccc(e1)C[C@@](C)(N)C(=O)OCc3cc(cc(e3)N(C)S(=O)(=O)C)C(=O)N[C@H](CC2)c4cccc4               | 5.699 | 5.207 | 5.194 | 5.549 | 5.369 | 60.696 |
| 404 <sup>21</sup> | c1cc(F)ccc1[C@@H](C)NC(=O)c2cc(cc(e2)N(C)S(=O)(=O)C)-c(nn3)oc3[C@](C)(N)Cc4cccc4              | 5.046 | 4.492 | 5.507 | 4.173 | 4.729 | 58.444 |
| 405 <sup>21</sup> | c1cc(F)ccc1[C@@H](C)N[C@H](C(F)(F)F)c2cc(cc(e2)N(C)S(=O)(=O)C)-c(nn3)oc3[C@](C)(N)Cc4cc(F)cc4 | 1.824 | 2.353 | 1.343 | 2.479 | 1.438 | 60.179 |
| 406 <sup>21</sup> | c12cccc(e1)C[C@@](C)(N)C(=O)OCc3cc(cc(e3)N(C)S(=O)(=O)C)[C@@H](C(F)(F)F)N[C@H](CC2)c4cccc4    | 2.432 | 2.832 | 2.489 | 2.349 | 2.798 | 69.236 |
| 407 <sup>21</sup> | c12cccc(e1)C[C@@](C)(N)C(=O)OCc3cc(NCCCC2)nc(e3)N(C)S(=O)(=O)C                                | 3.398 | 2.395 | 3.274 | 3.082 | 3.322 | 73.380 |
| 408 <sup>21</sup> | c12cccc(e1)C[C@@](C)(N)C(=O)OCc3cc(nc(e3)N(C)S(=O)(=O)C)N(CC2)Cc4cccc4                        | 1.886 | 3.847 | 2.016 | 2.192 | 1.644 | 65.309 |
| 409 <sup>21</sup> | c12cccc(e1)C[C@@](C)(N)C(=O)OCc3cc(N(C)C)CCCC2nc(e3)N(C)S(=O)(=O)C                            | 1.658 | 2.584 | 2.735 | 2.140 | 1.855 | 72.792 |
| 410 <sup>21</sup> | c12cccc(e1)C[C@@](C)(N)C(=O)OCc3cc(N(C)C)CC4CC4nc(e3)N(C)S(=O)(=O)C                           | 2.222 | 2.951 | 2.745 | 2.898 | 3.193 | 69.156 |
| 411 <sup>21</sup> | c12cccc(e1)C[C@@](C)(N)C(=O)OCc3cc(CC[C@@H](C)CC2)cc(e3)N(C)S(=O)(=O)C                        | 2.770 | 3.568 | 2.721 | 2.802 | 2.563 | 72.262 |
| 412 <sup>21</sup> | c12cccc(e1)C[C@@](C)(N)C(=O)OCc3cc(CC[C@@H](C)CC2)nc(e3)N(C)S(=O)(=O)C                        | 2.745 | 2.513 | 2.640 | 2.607 | 2.696 | 70.611 |
| 413 <sup>21</sup> | c12cccc(e1)C[C@@](C)(N)C(=O)OCc3cc(nc(e3)N(C)S(=O)(=O)C)CC[C@@H](CC2)c4cccc4                  | 2.155 | 2.442 | 2.119 | 3.034 | 2.305 | 72.381 |
| 414 <sup>21</sup> | c12cccc(e1)C[C@@](C)(N)C(=O)OCc3cc(CCCCC2)nc(e3)N(C)S(=O)(=O)C                                | 1.824 | 2.497 | 2.016 | 2.581 | 2.049 | 64.269 |
| 415 <sup>22</sup> | C1CCC(=O)N1e2cc(OCC)cc(e2)C(=O)N[C@@H](Cc3cccc3)[C@H](O)CNCe4cccc(e4)C(F)(F)F                 | 3.420 | 3.973 | 4.244 | 4.081 | 4.398 | 68.839 |
| 416 <sup>22</sup> | O=C1CCC(C)=C1e2cc(OCC)cc(e2)C(=O)N[C@@H](Cc3cccc3)[C@H](O)CNCe4cccc(e4)C(F)(F)F               | 3.602 | 4.388 | 4.246 | 3.397 | 3.522 | 70.738 |
| 417 <sup>22</sup> | c1cccc(C(=O)C)c1-e2cc(OCC)cc(e2)C(=O)N[C@@H](Cc3cccc3)[C@H](O)CNCe4cccc(e4)C(F)(F)F           | 3.553 | 3.178 | 3.681 | 3.431 | 3.785 | 72.440 |
| 418 <sup>22</sup> | c1cccc(C#N)c1-e2cc(OCC)cc(e2)C(=O)N[C@@H](Cc3cccc3)[C@H](O)CNCe4cccc(e4)C(F)(F)F              | 3.796 | 3.201 | 3.378 | 3.539 | 3.582 | 76.122 |
| 419 <sup>22</sup> | C1CCN(S1(=O)=O)e2cc(OCC)cc(e2)C(=O)N[C@@H](Cc3cccc3)[C@H](O)CNCe4cccc(e4)C(F)(F)F             | 4.301 | 4.256 | 4.156 | 4.435 | 4.834 | 70.519 |
| 420 <sup>22</sup> | C1CCCN(S1(=O)=O)e2cc(OCC)cc(e2)C(=O)N[C@@H](Cc3cccc3)[C@H](O)CNCe4cccc(e4)C(F)(F)F            | 5.222 | 4.703 | 4.973 | 4.392 | 5.322 | 71.775 |
| 421 <sup>22</sup> | C1CCCN(S1(=O)=O)e2cc(CCC)cc(e2)C(=O)N[C@@H](Cc3cccc3)[C@H](O)CNCe4cccc(e4)C(F)(F)F            | 5.301 | 4.814 | 4.215 | 4.282 | 6.307 | 72.945 |
| 422 <sup>22</sup> | C1CCCN(S1(=O)=O)e2cc(NC(C)C)cc(e2)C(=O)N[C@@H](Cc3cccc3)[C@H](O)CNCe4cccc(e4)C(F)(F)F         | 4.959 | 4.278 | 5.395 | 4.455 | 4.598 | 70.571 |
| 423 <sup>22</sup> | C1CCCN(S1(=O)=O)e2cc(OCC)cc(e2)C(=O)N[C@@H](Cc3cccc3)[C@H](O)CNCe4cccc(e4)OC(F)(F)F           | 5.301 | 5.068 | 5.279 | 4.727 | 5.267 | 70.681 |
| 424 <sup>22</sup> | C1CCCN(S1(=O)=O)e2cc(NCC)cc(e2)C(=O)N[C@@H](Cc3cccc3)[C@H](O)CNCe4cccc(e4)OC(F)(F)F           | 5.301 | 4.420 | 5.446 | 4.800 | 5.016 | 70.593 |
| 425 <sup>22</sup> | C1CCCN(S1(=O)=O)e2cc(NCC)cc(e2)C(=O)N[C@@H](Cc3cccc3)[C@H](O)CNCe4cccc4                       | 3.921 | 3.424 | 4.520 | 4.467 | 3.700 | 75.086 |
| 426 <sup>22</sup> | C1CCCN(S1(=O)=O)e2cc(NCC)cc(e2)C(=O)N[C@@H](Cc3cccc3)[C@H](O)CNC[C@@H]4CCc(e45)cccc5          | 4.469 | 5.096 | 4.715 | 4.777 | 4.122 | 73.476 |
|                   | C1CCCN(S1(=O)=O)e2cc(NCC)cc(e2)C(=O)N[C@@H](Cc3cccc3)[C@H](O)CNCe4cccc4                       | 4.745 | 4.748 | 3.656 | 5.068 | 4.666 | 69.036 |

|                   |                                                                                                     |       |       |       |       |       |        |  |
|-------------------|-----------------------------------------------------------------------------------------------------|-------|-------|-------|-------|-------|--------|--|
|                   | H](O)CN[C@@H]4CCc(c45)ccc(c5)OC                                                                     |       |       |       |       |       |        |  |
| 428 <sup>22</sup> | C1CCCN(S1(=O)=O)c2cc(NCC)cc(c2)C(=O)N[C@@H](Cc3ccccc3)[C@H](O)CNCc4cccc(c4)OC                       | 5.097 | 4.954 | 4.698 | 4.602 | 4.935 | 68.501 |  |
| 429 <sup>22</sup> | C1CCCN(S1(=O)=O)c2cc(NCC)cc(c2)C(=O)N[C@@H](Cc3cc(F)cc(F)c3)[C@H](O)CNCc4cccc(c4)OC                 | 5.301 | 4.542 | 4.681 | 5.002 | 5.128 | 69.909 |  |
| 430 <sup>22</sup> | C1CCCN(S1(=O)=O)c2cc(NCC)cc(c2)C(=O)N[C@@H](Cc3ccccc3)[C@H](O)CNCc4cccc(c4)OC                       | 4.398 | 3.679 | 3.697 | 4.299 | 4.754 | 71.132 |  |
| 431 <sup>22</sup> | C1CCCN(S1(=O)=O)c2cc(NCC)cc(c2)C(=O)N[C@@H](Cn3nccc3)[C@H](O)CNCc4cccc(c4)OC                        | 2.570 | 3.342 | 3.484 | 2.653 | 2.737 | 81.816 |  |
| 432 <sup>22</sup> | C1CCCN(S1(=O)=O)c2cc(NCC)cc(c2)C(=O)N[C@@H](CC(C)C)[C@H](O)CNCc3cccc(c3)OC                          | 2.240 | 2.719 | 2.902 | 3.943 | 2.596 | 70.562 |  |
| 433 <sup>22</sup> | C1CCCN(S1(=O)=O)c2cc(NCC)cc(c2F)C(=O)N[C@@H](Cc3ccccc3)[C@H](O)CNCc4cccc(c4)OC                      | 5.398 | 4.484 | 4.910 | 4.693 | 5.608 | 78.502 |  |
| 434 <sup>22</sup> | C1CCCN(S1(=O)=O)c2cc(NCC)cc(c2F)C(=O)N[C@@H](Cc3ccccc3)[C@H](O)CNCc4cnn(c4)CC                       | 5.222 | 5.143 | 4.333 | 4.552 | 5.471 | 84.273 |  |
| 435 <sup>23</sup> | c1cccc1CO[C@@H](CN2)C[C@@H]2[C@@H](O)[C@H](Cc3cc(F)cc(F)c3)NC(=O)[C@@H]4CC(=O)N(C4)CC               | 2.155 | 2.507 | 2.785 | 2.703 | 2.444 | 72.227 |  |
| 436 <sup>23</sup> | c1cccc1CO[C@@H](CN2)C[C@@H]2[C@@H](O)[C@H](Cc3cc(F)cc(F)c3)NC(=O)[C@@H]4CC(=O)N(C4)CCC              | 3.046 | 3.131 | 2.272 | 3.719 | 3.447 | 71.737 |  |
| 437 <sup>23</sup> | c1cccc1CO[C@@H](CN2)C[C@@H]2[C@@H](O)[C@H](Cc3cc(F)cc(F)c3)NC(=O)[C@@H]4CC(=O)N(C4)C(C)C            | 2.523 | 2.660 | 3.354 | 2.752 | 2.464 | 69.079 |  |
| 438 <sup>23</sup> | c1cccc1CO[C@@H](CN2)C[C@@H]2[C@@H](O)[C@H](Cc3cc(F)cc(F)c3)NC(=O)[C@@H]4CC(=O)N(C4)CCCC             | 3.432 | 3.873 | 4.648 | 3.831 | 3.607 | 74.167 |  |
| 439 <sup>23</sup> | c1cccc1CO[C@@H](CN2)C[C@@H]2[C@@H](O)[C@H](Cc3cc(F)cc(F)c3)NC(=O)[C@@H]4CC(=O)N(C4)CCCCC            | 4.347 | 4.494 | 4.968 | 3.847 | 4.447 | 72.615 |  |
| 440 <sup>23</sup> | c1cccc1CO[C@@H](CN2)C[C@@H]2[C@@H](O)[C@H](Cc3cc(F)cc(F)c3)NC(=O)[C@@H]4CC(=O)N(C4)CCCCC            | 4.000 | 3.627 | 3.893 | 3.843 | 4.456 | 76.042 |  |
| 441 <sup>23</sup> | c1cccc1CO[C@@H](CN2)C[C@@H]2[C@@H](O)[C@H](Cc3cc(F)cc(F)c3)NC(=O)[C@@H]4CC(=O)N(C4)CCCCC            | 4.149 | 4.533 | 3.955 | 3.861 | 4.414 | 73.249 |  |
| 442 <sup>23</sup> | c1cccc1CO[C@@H](CN2)C[C@@H]2[C@@H](O)[C@H](Cc3cc(F)cc(F)c3)NC(=O)[C@@H]4CC(=O)N(C4)CC5CC5           | 3.810 | 2.847 | 3.066 | 4.068 | 4.485 | 74.269 |  |
| 443 <sup>23</sup> | c1cccc1CO[C@@H](CN2)C[C@@H]2[C@@H](O)[C@H](Cc3cc(F)cc(F)c3)NC(=O)[C@@H]4CC(=O)N(C4)CCOCC            | 2.699 | 2.716 | 3.502 | 3.742 | 2.495 | 79.169 |  |
| 444 <sup>23</sup> | c1cccc1CO[C@@H](CN2)C[C@@H]2[C@@H](O)[C@H](Cc3cc(F)cc(F)c3)NC(=O)[C@@H]4CC(=O)N(C4)CCOC             | 2.530 | 2.827 | 3.475 | 2.701 | 2.741 | 75.973 |  |
| 445 <sup>23</sup> | c1cccc1CO[C@@H](CN2)C[C@@H]2[C@@H](O)[C@H](Cc3cc(F)cc(F)c3)NC(=O)[C@@H]4CC(=O)N(C4)CCOCC            | 3.569 | 4.201 | 3.858 | 3.843 | 3.205 | 72.761 |  |
| 446 <sup>23</sup> | c1cccc1CO[C@@H](CN2)C[C@@H]2[C@@H](O)[C@H](Cc3cc(F)cc(F)c3)NC(=O)[C@@H]4CC(=O)N(C4)CCOCCC           | 3.071 | 3.127 | 3.474 | 3.854 | 3.290 | 75.344 |  |
| 447 <sup>23</sup> | c1cccc1CO[C@@H](CN2)C[C@@H]2[C@@H](O)[C@H](Cc3cc(F)cc(F)c3)NC(=O)[C@@H]4CC(=O)N(C4)Cc5ccccc5        | 3.538 | 3.097 | 3.035 | 3.681 | 3.439 | 75.484 |  |
| 448 <sup>23</sup> | c1cccc1CO[C@@H](CN2)C[C@@H]2[C@@H](O)[C@H](Cc3cc(F)cc(F)c3)NC(=O)[C@@H]4CC(=O)N(C4)Cc5ccc(F)cc5     | 2.553 | 2.973 | 3.094 | 3.737 | 2.504 | 73.002 |  |
| 449 <sup>23</sup> | c1cccc1CO[C@@H](CN2)C[C@@H]2[C@@H](O)[C@H](Cc3cc(F)cc(F)c3)NC(=O)[C@@H]4CC(=O)N(C4)Cc5ccc(Cl)cc5    | 1.726 | 1.975 | 1.208 | 1.726 | 1.496 | 70.173 |  |
| 450 <sup>23</sup> | c1cccc1CO[C@@H](CN2)C[C@@H]2[C@@H](O)[C@H](Cc3cc(F)cc(F)c3)NC(=O)[C@@H]4CC(=O)N(C4)Cc5ccc(C(F)F)cc5 | 1.337 | 1.804 | 1.363 | 1.729 | 1.519 | 65.821 |  |
| 451 <sup>23</sup> | c1cccc1CO[C@@H](CN2)C[C@@H]2[C@@H](O)[C@H](Cc3cc(F)cc(F)c3)NC(=O)[C@@H]4CC(=O)N(C4)Cc5cc(F)ccc5     | 3.471 | 2.714 | 3.114 | 3.728 | 4.504 | 73.213 |  |
| 452 <sup>23</sup> | c1cccc1CO[C@@H](CN2)C[C@@H]2[C@@H](O)[C@H](Cc3cc(F)cc(F)c3)NC(=O)[C@@H]4CC(=O)N(C4)Cc5cc(C)ccc5     | 3.456 | 3.483 | 2.791 | 3.725 | 4.440 | 60.476 |  |
| 453 <sup>23</sup> | c1cccc1CO[C@@H](CN2)C[C@@H]2[C@@H](O)[C@H](Cc3cc(F)cc(F)c3)NC(=O)[C@@H]4CC(=O)N(C4)Cc5ccccc5F       | 3.438 | 3.197 | 3.187 | 3.869 | 3.490 | 72.373 |  |
| 454 <sup>23</sup> | c1cccc1CO[C@@H](CN2)C[C@@H]2[C@@H](O)[C@H](Cc3cc(F)cc(F)c3)NC(=O)[C@@H]4CC(=O)N(C4)Cc5cccn5         | 3.506 | 3.430 | 3.793 | 3.641 | 4.493 | 60.714 |  |
| 455 <sup>23</sup> | c1cccc1CO[C@@H](CN2)C[C@@H]2[C@@H](O)[C@H](Cc3cc(F)cc(F)c3)NC(=O)[C@@H]4CC(=O)N(C4)Cc5enccc5        | 3.660 | 2.893 | 2.964 | 3.794 | 3.435 | 68.409 |  |
| 456 <sup>23</sup> | c1cccc1CO[C@@H](CN2)C[C@@H]2[C@@H](O)[C@H](Cc3cc(F)cc(F)c3)NC(=O)[C@@H]4CC(=O)N(C4)Cc5ccc5          | 3.648 | 3.782 | 3.533 | 3.758 | 3.495 | 56.323 |  |
| 457 <sup>23</sup> | c1cccc1CO[C@@H](CN2)C[C@@H]2[C@@H](O)[C@H](Cc3cc(F)cc(F)c3)NC(=O)[C@@H]4CC(=O)N(C4)Cc5ccc5          | 3.519 | 3.185 | 3.124 | 3.887 | 3.422 | 63.235 |  |
| 458 <sup>23</sup> | c1cccc1CO[C@@H](CN2)C[C@@H]2[C@@H](O)[C@H](NC(=O)[C@@H]3[C@@H](C(=O)NC3)CCC)Cc4cc(F)cc(F)c4         | 2.921 | 3.258 | 3.007 | 3.695 | 2.495 | 61.629 |  |
| 459 <sup>23</sup> | c1cccc1CO[C@@H](CN2)C[C@@H]2[C@@H](O)[C@H](Cc3cc(F)cc(F)c3)NC(=O)[C@@H]4[C@@H](CCC)C(=O)N(C4)CCCC   | 3.848 | 4.558 | 3.408 | 4.122 | 4.394 | 67.001 |  |
|                   | c1cccc1CO[C@@H](CN2)C[C@@H]2[C@@H](O)[C@H](Cc3cc(F)cc(F)c3)NC(=O)[C@@H]4CC(=O)N(C4)CCCC             | 3.050 | 4.044 | 3.640 | 4.137 | 3.638 | 69.121 |  |

|                   |                                                                                                      |       |       |       |       |       |        |  |  |
|-------------------|------------------------------------------------------------------------------------------------------|-------|-------|-------|-------|-------|--------|--|--|
|                   | F)c3)NC(=O)[C@@H]4[C@H](CCCC)C(=O)N(C4)CCCC                                                          |       |       |       |       |       |        |  |  |
| 461 <sup>23</sup> | c1cccc1CO[C@@H](CN2)C[C@@H]2[C@H](O)[C@H](Cc3cc(F)cc(F)c3)NC(=O)[C@H]4[C@H](CC(C)C)C(=O)N(C4)CCCC    | 4.244 | 4.347 | 4.137 | 4.112 | 4.477 | 64.653 |  |  |
| 462 <sup>23</sup> | c1cccc1CO[C@@H](CN2)C[C@@H]2[C@H](O)[C@H](Cc3cc(F)cc(F)c3)NC(=O)[C@H]4[C@H](C(=O)N(C4)CCCC)Cc5ccccc5 | 4.108 | 4.325 | 4.436 | 4.420 | 4.493 | 63.814 |  |  |
| 463 <sup>23</sup> | c1cccc1CO[C@@H](CN2)C[C@@H]2[C@H](O)[C@H](Cc3cc(F)cc(F)c3)NC(=O)[C@H]4[C@H](C5CC5)C(=O)N(C4)CCCC     | 3.244 | 4.261 | 3.589 | 4.063 | 3.407 | 61.269 |  |  |
| 464 <sup>23</sup> | c1cccc1CO[C@@H](CN2)C[C@@H]2[C@H](O)[C@H](Cc3cc(F)cc(F)c3)NC(=O)[C@H]4[C@H](C5CCCC)C(=O)N(C4)CCCC    | 3.530 | 3.949 | 3.207 | 3.957 | 3.428 | 64.124 |  |  |
| 465 <sup>23</sup> | c1cccc1CO[C@@H](CN2)C[C@@H]2[C@H](O)[C@H](Cc3cc(F)cc(F)c3)NC(=O)[C@H]4[C@H](CC(C)C)C(=O)N(C4)CCCC    | 3.438 | 3.633 | 3.876 | 4.117 | 4.440 | 57.413 |  |  |
| 466 <sup>23</sup> | c1cccc1CO[C@@H](CN2)C[C@@H]2[C@H](O)[C@H](Cc3cc(F)cc(F)c3)NC(=O)[C@H]4[C@H](C(=O)N(C4)CCCC)Cc5ccccc5 | 3.533 | 3.865 | 4.041 | 4.419 | 3.417 | 60.920 |  |  |
| 467 <sup>24</sup> | Fc1cc(F)cc(c1)C[C@H]([C@H](O)[C@@H]2NCC2)NC(=O)c3cc(cc(c3)C)C(=O)N(CCC)CCC                           | 3.114 | 3.288 | 2.858 | 3.448 | 3.250 | 51.197 |  |  |
| 468 <sup>24</sup> | Fc1cc(F)cc(c1)C[C@H]([C@H](O)[C@H]2CCCN2)NC(=O)c3cc(cc(c3)C)C(=O)N(CCC)CCC                           | 4.187 | 3.522 | 3.907 | 4.174 | 4.292 | 57.616 |  |  |
| 469 <sup>24</sup> | Fc1cc(F)cc(c1)C[C@H]([C@H](O)[C@H]2C[C@@H](O)CN2)NC(=O)c3cc(cc(c3)C)C(=O)N(CCC)CCC                   | 4.051 | 3.943 | 3.949 | 3.989 | 3.897 | 63.964 |  |  |
| 470 <sup>24</sup> | Fc1cc(F)cc(c1)C[C@H]([C@H](O)[C@H]2C[C@@H](CN2)OC)NC(=O)c3cc(cc(c3)C)C(=O)N(CCC)CCC                  | 3.728 | 4.732 | 3.925 | 4.358 | 3.467 | 68.891 |  |  |
| 471 <sup>24</sup> | CCCN(CCC)C(=O)c(cc(c1)C)cc1C(=O)N[C@H](Cc(c2)cc(F)cc2F)[C@H](O)[C@H]3C[C@H](CN3)OCc4ccccc4           | 5.301 | 5.158 | 4.585 | 4.883 | 5.212 | 61.236 |  |  |
| 472 <sup>24</sup> | CCCN(CCC)C(=O)c(cc(c1)C)cc1C(=O)N[C@H](Cc(c2)cc(F)cc2F)[C@H](O)[C@H]3C[C@H](CN3)OCc4ccccc4           | 5.523 | 4.373 | 4.685 | 5.276 | 5.320 | 65.112 |  |  |
| 473 <sup>24</sup> | Fc1cc(F)cc(c1)C[C@H]([C@H](O)[C@@H]2NCCC2)NC(=O)c3cc(cc(c3)C)C(=O)N(CCC)CCC                          | 3.886 | 4.328 | 3.838 | 4.324 | 3.434 | 63.162 |  |  |
| 474 <sup>24</sup> | CCC[C@H](C1)CCN[C@H]1[C@@H](O)[C@@H](Cc(c2)cc(F)cc2F)NC(=O)c3cc(cc(c3)C)C(=O)N(CCC)CCC               | 4.155 | 3.680 | 3.270 | 4.474 | 4.053 | 65.179 |  |  |
| 475 <sup>24</sup> | CCCN(CCC)C(=O)c(cc(c1)C)cc1C(=O)N[C@H](Cc(c2)cc(F)cc2F)[C@H](O)[C@H]3NCC[C@H](C3)Cc4ccccc4           | 4.854 | 4.480 | 4.753 | 4.576 | 4.707 | 56.316 |  |  |
| 476 <sup>24</sup> | CCCN(CCC)C(=O)c(cc(c1)C)cc1C(=O)N[C@H](Cc(c2)cc(F)cc2F)[C@H](O)[C@H]3NCC[C@H](C3)Cc4c(OC)cccc4       | 2.870 | 3.091 | 2.968 | 3.582 | 3.869 | 61.635 |  |  |
| 477 <sup>24</sup> | CCCN(CCC)C(=O)c(cc(c1)C)cc1C(=O)N[C@H](Cc(c2)cc(F)cc2F)[C@H](O)[C@H]3NCC[C@H](C3)Cc4cc(OC)cccc4      | 3.481 | 4.617 | 3.743 | 4.560 | 3.210 | 61.866 |  |  |
| 478 <sup>24</sup> | CCCN(CCC)C(=O)c(cc(c1)C)cc1C(=O)N[C@H](Cc(c2)cc(F)cc2F)[C@H](O)[C@H]3NCC[C@H](C3)Cc4ccc(cc4)OC       | 3.357 | 3.397 | 3.669 | 4.680 | 3.302 | 50.306 |  |  |
| 479 <sup>24</sup> | CCCN(CCC)C(=O)c(cc(c1)C)cc1C(=O)N[C@H](Cc(c2)cc(F)cc2F)[C@H](O)[C@H]3NCC[C@H](C3)CCc4ccccc4          | 3.719 | 3.889 | 4.053 | 4.478 | 4.731 | 50.410 |  |  |
| 480 <sup>24</sup> | CCCN(CCC)C(=O)c(cc(c1)C)cc1C(=O)N[C@H](Cc(c2)cc(F)cc2F)[C@H](O)[C@H]3NCC[C@H](C3)C4CCCC4             | 3.215 | 3.632 | 3.627 | 3.665 | 3.162 | 62.021 |  |  |
| 481 <sup>24</sup> | CCCN(CCC)C(=O)c(cc(c1)C)cc1C(=O)N[C@H](Cc(c2)cc(F)cc2F)[C@H](O)[C@H]3NCC[C@H](C3)CC4CCCC4            | 3.201 | 3.623 | 4.071 | 3.775 | 3.426 | 68.704 |  |  |
| 482 <sup>24</sup> | O=C(C)O[C@H](C1)CCN[C@H]1[C@@H](O)[C@@H](Cc(c2)cc(F)cc2F)NC(=O)c3cc(cc(c3)C)C(=O)N(CCC)CCC           | 2.699 | 3.267 | 2.590 | 3.690 | 2.457 | 63.236 |  |  |
| 483 <sup>24</sup> | CCO[C@H](C1)CCN[C@H]1[C@@H](O)[C@@H](Cc(c2)cc(F)cc2F)NC(=O)c3cc(cc(c3)C)C(=O)N(CCC)CCC               | 5.097 | 5.084 | 5.225 | 4.605 | 4.817 | 61.737 |  |  |
| 484 <sup>24</sup> | CCCN(CCC)C(=O)c(cc(c1)C)cc1C(=O)N[C@H](Cc(c2)cc(F)cc2F)[C@H](O)[C@H]3NCC[C@H](C3)OCCCC               | 5.155 | 4.353 | 4.291 | 4.570 | 5.418 | 61.297 |  |  |
| 485 <sup>24</sup> | CC(C)O[C@H](C1)CCN[C@H]1[C@@H](O)[C@@H](Cc(c2)cc(F)cc2F)NC(=O)c3cc(cc(c3)C)C(=O)N(CCC)CCC            | 3.921 | 3.860 | 4.712 | 4.551 | 3.825 | 59.839 |  |  |
| 486 <sup>24</sup> | CCCN(CCC)C(=O)c(cc(c1)C)cc1C(=O)N[C@H](Cc(c2)cc(F)cc2F)[C@H](O)[C@H]3NCC[C@H](C3)OCC4CC4             | 5.222 | 4.418 | 4.878 | 4.480 | 5.700 | 66.449 |  |  |
| 487 <sup>24</sup> | CCCN(CCC)C(=O)c(cc(c1)C)cc1C(=O)N[C@H](Cc(c2)cc(F)cc2F)[C@H](O)[C@H]3NCC[C@H](C3)OCCOC               | 5.398 | 4.904 | 5.512 | 4.556 | 5.014 | 59.382 |  |  |
| 488 <sup>24</sup> | CCCN(CCC)C(=O)c(cc(c1)C)cc1C(=O)N[C@H](Cc(c2)cc(F)cc2F)[C@H](O)[C@H]3NCC[C@H](C3)OCCN(C)C            | 4.585 | 4.659 | 4.358 | 4.607 | 4.871 | 61.651 |  |  |
| 489 <sup>24</sup> | CCCN(CCC)C(=O)c(cc(c1)C)cc1C(=O)N[C@H](Cc(c2)cc(F)cc2F)[C@H](O)[C@H]3NCC[C@H](C3)OCC4CCCC4           | 4.921 | 4.537 | 4.350 | 4.575 | 4.977 | 60.673 |  |  |
| 490 <sup>25</sup> | c1c(F)cc(F)cc1C[C@@H](CO)NC(=O)c2cc(N(C)S(=O)(=O)C)nc(c2)NC[C@H]3[C@H](C3)C                          | 4.131 | 3.929 | 3.373 | 4.322 | 4.750 | 64.954 |  |  |
| 491 <sup>25</sup> | c1c(F)cc(F)cc1C[C@@H]([C@@H](O)CCCC)NC(=O)c2cc(N(C)S(=O)(=O)C)nc(c2)NC[C@H]3[C@H](C3)C               | 4.886 | 4.776 | 5.077 | 4.867 | 5.048 | 58.203 |  |  |
| 492 <sup>25</sup> | c1c(F)cc(F)cc1C[C@@H]([C@@H](N)CCCC)NC(=O)c2cc(N(C)S(=O)(=O)C)nc(c2)NC[C@H]3[C@H](C3)C               | 5.046 | 4.814 | 4.726 | 4.788 | 5.676 | 72.576 |  |  |
|                   | c1cccc1C[C@H](CN)NC(=O)c2cc(N(C)S(=O)(=O)C)nc(c2)NC[C@H]3[C@H](C3)C                                  | 4.460 | 3.746 | 4.463 | 4.038 | 5.442 | 54.743 |  |  |

|                   |                                                                                             |       |       |       |       |       |        |
|-------------------|---------------------------------------------------------------------------------------------|-------|-------|-------|-------|-------|--------|
|                   | 3[C@H](C3)C                                                                                 |       |       |       |       |       |        |
| 494 <sup>25</sup> | c1cccc1C[C@@H]([C@@H](N)CCCC)NC(=O)c2cc(N(C)S(=O)(=O)C)nc(c2)NC[C@H]3[C@H](C3)C             | 4.699 | 4.372 | 4.226 | 4.570 | 4.092 | 65.636 |
| 495 <sup>25</sup> | c1cccc1C[C@@H]([C@@H](N)CCCF(F)F)NC(=O)c2cc(N(C)S(=O)(=O)C)nc(c2)NC[C@H]3[C@H](C3)C         | 5.699 | 5.693 | 5.750 | 4.380 | 4.926 | 41.019 |
| 496 <sup>25</sup> | c1cccc1C[C@@H]([C@@H](N)CCCC)NC(=O)c2cc(N(C)S(=O)(=O)C)nc(c2)NC[C@H]3[C@H](C3)C             | 4.959 | 4.704 | 4.167 | 4.224 | 4.231 | 58.454 |
| 497 <sup>25</sup> | c1cccc1C[C@@H]([C@@H](C)N)NC(=O)c2cc(N(C)S(=O)(=O)C)nc(c2)NC[C@H]3[C@H](C3)C                | 4.495 | 4.756 | 4.242 | 3.972 | 5.457 | 63.652 |
| 498 <sup>25</sup> | c1cccc1C[C@@H]([C@@H](N)CCCC)NC(=O)c2cc(N(C)S(=O)(=O)C)nc(c2)NC[C@H]3[C@H](C3)C             | 4.509 | 5.222 | 4.667 | 4.437 | 3.964 | 63.569 |
| 499 <sup>25</sup> | c1cccc1C[C@@H]([C@@H](N)CCCC)NC(=O)c2cc(N(C)S(=O)(=O)C)CC(C)nc(c2)NC(C)C[C@H]3[C@H](C3)C    | 4.409 | 4.689 | 4.375 | 4.476 | 3.954 | 63.365 |
| 500 <sup>25</sup> | c1cccc1C[C@@H]([C@@H](C)N)NC(=O)c2cc(N(S(=O)(=O)C)CCC)nc(c2)NC(C)C[C@H]3[C@H](C3)C          | 4.174 | 4.627 | 4.459 | 4.207 | 4.081 | 64.265 |
| 501 <sup>25</sup> | c1cccc1C[C@@H]([C@@H](N)COC)NC(=O)c2cc(N(C)S(=O)(=O)C)nc(c2)NC(C)C[C@H]3[C@H](C3)C          | 4.921 | 4.143 | 4.327 | 4.193 | 5.043 | 67.375 |
| 502 <sup>25</sup> | c1cccc1C[C@@H]([C@@H](N)COC)NC(=O)c2cc(N(C)S(=O)(=O)C(C)C)nc(c2)NC(C)C[C@H]3[C@H](C3)C      | 4.620 | 3.997 | 4.288 | 4.224 | 3.934 | 62.418 |
| 503 <sup>25</sup> | c1cccc1C[C@@H]([C@@H](N)COCC)NC(=O)c2cc(N(C)S(=O)(=O)C(C)C)nc(c2)NC(C)C[C@H]3[C@H](C3)C     | 4.620 | 4.543 | 4.165 | 4.213 | 4.186 | 63.699 |
| 504 <sup>25</sup> | c1cccc1C[C@@H]([C@@H](N)COC)NC(=O)c2cc(N(C)S(=O)(=O)C(C)C)nc(c2)NC(C)C[C@H]3[C@H](C3)C)CCOC | 5.222 | 4.850 | 5.285 | 4.525 | 5.045 | 64.528 |
| 505 <sup>26</sup> | c1cccc1-c2ccc(-c3cccc3)n2Cc4cccc(n4)N                                                       | 2.284 | 2.244 | 1.755 | 2.286 | 3.272 | 63.844 |
| 506 <sup>26</sup> | c1cc(OC)ccc1-c2ccc(-c3c(Cl)cccc3)n2Cc4cccc(n4)N                                             | 2.611 | 2.879 | 2.105 | 2.825 | 2.204 | 63.068 |
| 507 <sup>26</sup> | CCCOc(cc1)ccc1-c2ccc(-c3c(Cl)cccc3)n2Cc4cccc(n4)N                                           | 2.939 | 3.650 | 2.894 | 2.875 | 2.518 | 64.279 |
| 508 <sup>26</sup> | CCCCOe(cc1)ccc1-c2ccc(-c3c(Cl)cccc3)n2Cc4cccc(n4)N                                          | 2.783 | 2.794 | 2.499 | 2.891 | 2.278 | 61.984 |
| 509 <sup>26</sup> | CCCCOe(cc1)ccc1-c2ccc(-c3c(Cl)cccc3)n2Cc4cccc(n4)N                                          | 3.260 | 2.761 | 3.158 | 2.900 | 3.727 | 65.596 |
| 510 <sup>26</sup> | N#CCCCOe(cc1)ccc1-c2ccc(-c3c(Cl)cccc3)n2Cc4cccc(n4)N                                        | 3.377 | 3.350 | 3.497 | 2.915 | 3.532 | 68.834 |
| 511 <sup>26</sup> | CCNC(=O)c(cc1)ccc1-c2ccc(-c3cccc3)n2Cc4cccc(n4)N                                            | 2.648 | 3.006 | 2.304 | 2.561 | 1.690 | 65.831 |
| 512 <sup>26</sup> | CCNC(=O)c(cc1)ccc1-c2ccc(-c3cccc3)n2Cc4cccc(n4)N                                            | 2.523 | 2.667 | 2.672 | 2.622 | 3.479 | 65.563 |
| 513 <sup>26</sup> | CCCCNC(=O)c(cc1)ccc1-c2ccc(-c3cccc3)n2Cc4cccc(n4)N                                          | 2.523 | 2.905 | 2.742 | 2.653 | 3.686 | 67.993 |
| 514 <sup>26</sup> | C=CCNC(=O)c(cc1)ccc1-c2ccc(-c3cccc3)n2Cc4cccc(n4)N                                          | 3.229 | 2.967 | 2.816 | 2.494 | 2.524 | 66.720 |
| 515 <sup>26</sup> | CC(C)NC(=O)c(cc1)ccc1-c2ccc(-c3cccc3)n2Cc4cccc(n4)N                                         | 2.750 | 2.728 | 2.738 | 3.055 | 3.417 | 66.769 |
| 516 <sup>26</sup> | C1CC1NC(=O)c(cc2)ccc2-c3ccc(-c4cccc4)n3Cc5cccc(n5)N                                         | 2.921 | 3.073 | 3.033 | 3.121 | 2.841 | 67.624 |
| 517 <sup>26</sup> | C1CCC1NC(=O)c(cc2)ccc2-c3ccc(-c4cccc4)n3Cc5cccc(n5)N                                        | 2.469 | 2.841 | 3.110 | 3.342 | 1.708 | 69.846 |
| 518 <sup>26</sup> | c1cccc1Oe(cc2)ccc2-c3ccc(-c4c(Cl)cccc4)n3Cc5cccc(n5)N                                       | 3.071 | 3.303 | 2.784 | 3.124 | 4.086 | 69.408 |
| 519 <sup>26</sup> | c1cccc1Oe(cc2)ccc2-c3ccc(-c4c(Cl)cccc4)n3Cc5cccc(n5)N                                       | 3.229 | 2.825 | 2.616 | 3.066 | 3.575 | 67.849 |
| 520 <sup>26</sup> | c1cccc1Oe(cc2)ccc2-c3ccc(-c4c(Cl)cccc4)n3Cc5cccc(n5)N                                       | 3.387 | 2.362 | 3.193 | 3.252 | 3.245 | 64.961 |
| 521 <sup>26</sup> | n1cccc1Oe(cc2)ccc2-c3ccc(-c4c(Cl)cccc4)n3Cc5cccc(n5)N                                       | 3.092 | 3.028 | 2.908 | 3.282 | 3.004 | 70.497 |
| 522 <sup>26</sup> | N1C=CC=N[C@@H]1Oe(cc2)ccc2-c3ccc(-c4c(Cl)cccc4)n3Cc5cccc(n5)N                               | 4.000 | 4.420 | 4.290 | 3.334 | 3.635 | 73.661 |
| 523 <sup>26</sup> | C1=NC=CN[C@@H]1Oe(cc2)ccc2-c3ccc(-c4c(Cl)cccc4)n3Cc5cccc(n5)N                               | 3.337 | 3.037 | 2.795 | 3.509 | 4.041 | 87.015 |
| 524 <sup>26</sup> | C1=CC=NN[C@@H]1Oe(cc2)ccc2-c3ccc(-c4c(Cl)cccc4)n3Cc5cccc(n5)N                               | 3.387 | 2.392 | 2.514 | 3.473 | 2.913 | 79.455 |
| 525 <sup>26</sup> | n1ccsc1Oe(cc2)ccc2-c3ccc(-c4c(Cl)cccc4)n3Cc5cccc(n5)N                                       | 3.538 | 3.081 | 3.374 | 3.346 | 3.589 | 73.190 |
| 526 <sup>26</sup> | N1C=CC=N[C@@H]1Ne(cc2)ccc2-c3ccc(-c4c(Cl)cccc4)n3Cc5cccc(n5)N                               | 3.009 | 2.922 | 2.119 | 3.758 | 3.351 | 77.942 |
| 527 <sup>26</sup> | CCCCOe(cc1)ccc1-c2ccc(-c3c(Cl)cccc3)n2Cc4ccc(c(n4)N)OCCO                                    | 3.959 | 3.482 | 3.852 | 3.805 | 4.797 | 79.835 |
| 528 <sup>26</sup> | CCCCOe(cc1)ccc1-c2ccc(-c3c(Cl)cccc3)n2Cc4ccc(c(n4)N)NCCO                                    | 3.770 | 3.015 | 2.696 | 3.435 | 4.667 | 79.223 |
| 529 <sup>26</sup> | CCCCOe(cc1)ccc1-c2ccc(-c3c(Cl)cccc3)n2Cc4ccc(c(n4)N)NCCCO                                   | 3.658 | 3.532 | 3.608 | 3.460 | 4.885 | 81.023 |
| 530 <sup>26</sup> | N1C=CC=N[C@@H]1Oe(cc2)ccc2-c3ccc(-c4c(Cl)cccc4)n3Cc5ccc(c(n5)N)OCCO                         | 4.398 | 4.624 | 3.876 | 3.788 | 5.449 | 81.256 |
| 531 <sup>26</sup> | N1C=CC=N[C@@H]1Oe(cc2)ccc2-c3ccc(-c4c(Cl)cccc4)n3Cc5ccc(c(n5)N)NCCO                         | 4.155 | 4.196 | 3.193 | 3.418 | 5.572 | 69.662 |
| 532 <sup>27</sup> | C1CCCCN1c(n2)nc(N3CCCC3)n2Nc(c4)ccc(c45)nc(s5)SCCC(=O)NCc6ccc(OC)c(c6)OC                    | 2.553 | 2.334 | 3.016 | 2.585 | 2.037 | 66.300 |
| 533 <sup>27</sup> | c1cccc1CNC(=O)CCSc(s2)nc(c23)ccc(c3)Nc4nc(N5CCCC5)nc(n4)N6C                                 | 2.770 | 2.293 | 2.682 | 2.452 | 3.258 | 65.169 |
| 534 <sup>27</sup> | CCOC(=O)CCSc(s1)nc(c12)ccc(c2)Nc3nc(N4CCCC4)nc(n3)N5CCCC5                                   | 2.752 | 2.372 | 2.703 | 2.404 | 1.757 | 62.407 |
| 535 <sup>27</sup> | c1cccc1NC(=O)CCSc(s2)nc(c23)ccc(c3)Nc4nc(N5CCCC5)nc(n4)N6C                                  | 3.921 | 3.312 | 2.920 | 3.665 | 4.953 | 64.967 |
| 536 <sup>27</sup> | C1CCCN1c(n2)nc(N3CCCC3)n2Nc(c4)ccc(c45)nc(s5)SCCC(=O)NCCO                                   | 2.523 | 2.945 | 2.622 | 2.624 | 2.690 | 66.092 |
| 537 <sup>27</sup> | c1ccc1CNC(=O)CCSc(s2)nc(c23)ccc(c3)Nc4nc(N5CCCC5)nc(n4)N6C                                  | 3.161 | 3.209 | 3.370 | 2.493 | 3.375 | 63.356 |
|                   | c1ccc(C)c(C)1NC(=O)CCSc(s2)nc(c23)ccc(c3)Nc4nc(N5CCCC5)nc(n4)                               | 2.548 | 2.756 | 2.242 | 2.772 | 2.138 | 68.675 |



|                   |                                                                                              |       |       |       |       |       |        |
|-------------------|----------------------------------------------------------------------------------------------|-------|-------|-------|-------|-------|--------|
|                   | N6CCCC6                                                                                      |       |       |       |       |       |        |
| 539 <sup>27</sup> | CCOc(c1)ccc1NC(=O)CCSc(s2)nc(e23)ccc(c3)Nc4nc(N5CCCC5)nc(n4)N6CCCC6                          | 1.764 | 2.207 | 1.825 | 2.290 | 2.653 | 71.019 |
| 540 <sup>27</sup> | C1COCCN1c(n2)nc(N3CCOCC3)nc2Nc(c4)ccc(c45)nc(s5)SCCC(=O)N6c(cccc7)c7CCc(c68)cccc8            | 1.833 | 1.751 | 2.454 | 2.646 | 3.324 | 66.483 |
| 541 <sup>28</sup> | CN(C)c1cccc1-c2nnc(c2)Nc3cc(c(C)cc3)NS(=O)(=O)C                                              | 0.499 | 1.123 | 1.474 | 1.659 | 0.262 | 65.152 |
| 542 <sup>28</sup> | c1cccc1-c2nnc(c2)Nc3cc(c(C)cc3)NS(=O)(=O)C                                                   | 1.620 | 1.855 | 1.549 | 1.137 | 0.796 | 68.428 |
| 543 <sup>28</sup> | c1cccc1-c2nnc(c2)Nc3cc(ccc3)NS(=O)(=O)C                                                      | 0.398 | 0.545 | 0.416 | 1.148 | 0.912 | 67.627 |
| 544 <sup>28</sup> | c1cccc1-c2nnc(c2)Nc3cc(c(Cl)cc3)NS(=O)(=O)C                                                  | 1.796 | 1.871 | 1.588 | 1.404 | 1.541 | 70.396 |
| 545 <sup>28</sup> | c1cccc1-c2nnc(c2)Nc3cc(c(Br)cc3)NS(=O)(=O)C                                                  | 1.523 | 1.613 | 1.326 | 1.076 | 1.061 | 49.048 |
| 546 <sup>28</sup> | c1cccc1-c2nnc(c2)Nc3cc(c(F)cc3)NS(=O)(=O)C                                                   | 0.959 | 0.681 | 0.518 | 1.183 | 1.029 | 45.381 |
| 547 <sup>28</sup> | c1cccc1-c2nnc(c2)Nc3cc(c(cc3)OC)NS(=O)(=O)C                                                  | 1.161 | 1.625 | 1.491 | 0.807 | 1.497 | 49.374 |
| 548 <sup>28</sup> | c1cccc1-c2nnc(c2)Nc3cc(NS(=O)(=O)C)c(cc3)CC=C                                                | 0.244 | 1.129 | 0.220 | 1.263 | 1.555 | 52.282 |
| 549 <sup>28</sup> | c1cc(N(C)C)ccc1-c2nnc(c2)Nc3cc(c(C)cc3)NS(=O)(=O)C                                           | 1.824 | 1.099 | 1.770 | 1.248 | 1.396 | 50.370 |
| 550 <sup>28</sup> | c1cccc(C)c1-c2nnc(c2)Nc3cc(c(C)cc3)NS(=O)(=O)C                                               | 0.660 | 1.615 | 1.176 | 1.249 | 0.561 | 29.197 |
| 551 <sup>28</sup> | c1cccc1-c(cc2)ccc2-c3nnc(c3)Nc4cc(c(C)cc4)NS(=O)(=O)C                                        | 1.721 | 1.561 | 2.060 | 1.356 | 1.415 | 16.530 |
| 552 <sup>28</sup> | OCCc(c1)ccc1-c2nnc(c2)Nc3cc(c(C)cc3)NS(=O)(=O)C                                              | 1.432 | 1.633 | 1.789 | 1.382 | 1.872 | 23.558 |
| 553 <sup>28</sup> | O1CCOc(c12)ccc(c2)-c3nnc(c3)Nc4cc(c(C)cc4)NS(=O)(=O)C                                        | 1.678 | 1.654 | 2.033 | 1.740 | 1.338 | 27.731 |
| 554 <sup>29</sup> | CC(C)c(c1)ccc1C2(CC2)NC[C@@H](O)[C@@H](NC(=O)c(c3)cc(cc34)COC)C5cccc(c5)OCCCCN4              | 4.770 | 4.666 | 3.775 | 4.853 | 4.053 | 30.868 |
| 555 <sup>29</sup> | CC(C)c(c1)ccc1CNC[C@@H](O)[C@@H](NC(=O)c(c2)ccc23)C4ccc(c4)OCCCCN3                           | 3.535 | 3.596 | 3.427 | 3.878 | 3.837 | 59.710 |
| 556 <sup>29</sup> | CC(C)c(c1)ccc1CNC[C@@H](O)[C@@H](NC(=O)c(c2)cc(nc23)C)C4cccc(c4)OCCCCO3                      | 4.377 | 4.346 | 3.873 | 3.738 | 4.130 | 24.479 |
| 557 <sup>29</sup> | CC(C)c(c1)ccc1CNC[C@@H](O)[C@@H](NC(=O)c(c2)cc(nc23)C)C4cccc(c4)OCCCCN3                      | 4.569 | 4.213 | 4.263 | 4.966 | 4.760 | 16.213 |
| 558 <sup>29</sup> | CC(C)c(c1)ccc1CNC[C@@H](O)[C@@H](NC(=O)c(c2)cc(cc23)COC)C4cccc(c4)OCCCCN3                    | 4.222 | 4.367 | 3.978 | 4.269 | 4.126 | 26.042 |
| 559 <sup>29</sup> | CC(C)c(c1)ccc1CNC[C@@H](O)[C@@H](NC(=O)c(c2)cc(cc23)N4COC)C4cccc(c5)OCCCCN3                  | 4.721 | 4.266 | 4.806 | 4.881 | 4.158 | 33.235 |
| 560 <sup>29</sup> | CC(C)c(c1)ccc1CNC[C@@H](O)[C@@H](NC(=O)c(c2)cc(cc23)N(C)S(=O)(=O)CCC)C4cccc(c4)OCCCCN3       | 6.000 | 5.650 | 6.096 | 5.013 | 5.753 | 32.385 |
| 561 <sup>29</sup> | CC(C)(C)c(c1)ccc1[C@@H](COC)NC[C@@H](O)[C@@H](NC(=O)c(c2)cc(cc23)COC)C4cccc(c4)OCCCCN3       | 3.175 | 3.589 | 4.266 | 4.050 | 4.203 | 44.460 |
| 562 <sup>29</sup> | CC(C)c(c1)ccc1[C@@H](C)NC[C@@H](O)[C@@H](NC(=O)c(c2)cc(nc23)C)C4cccc(c4)OCCCCO3              | 4.081 | 4.230 | 4.215 | 3.867 | 4.305 | 73.605 |
| 563 <sup>29</sup> | CC(C)(C)c(c1)ccc1[C@@H](CF)NC[C@@H](O)[C@@H](NC(=O)c(c2)cc(cc23)COC)C4cccc(c4)OCCCCN3        | 3.752 | 3.971 | 3.863 | 4.295 | 3.683 | 73.202 |
| 564 <sup>29</sup> | CC(C)c(c1)ccc1C2(CC2)NC[C@@H](O)[C@@H](NC(=O)c(c3)cc(nc34)C)C5cccc(c5)OCCCCO4                | 4.770 | 4.271 | 4.176 | 4.322 | 5.767 | 76.426 |
| 565 <sup>29</sup> | CC(C)c(c1)ccc1C2(CC2)NC[C@@H](O)[C@@H](NC(=O)c(c3)cc(nc34)COC)C5cccc(c5)OCCCCO4              | 5.046 | 4.720 | 4.450 | 4.680 | 4.028 | 65.743 |
| 566 <sup>29</sup> | CC(C)c(c1)ccc1C2(CC2)NC[C@@H](O)[C@@H](NC(=O)c(c3)cc(cc34)N5C(=O)CCC5)C6cccc(c6)OCCCCO4      | 6.000 | 5.819 | 5.424 | 5.431 | 6.081 | 63.658 |
| 567 <sup>29</sup> | CC(C)c(c1)ccc1C2(CC2)NC[C@@H](O)[C@@H](NC(=O)c(c3)cc(cc34)N(C)S(=O)(=O)CCC)C5cccc(c5)OCCCCN4 | 5.699 | 5.888 | 5.364 | 5.597 | 6.021 | 69.212 |
| 568 <sup>29</sup> | CC(C)c(c1)ccc1C(C)NC[C@@H](O)[C@@H](NC(=O)c(c2)cc(cc23)COC)C4cccc(c4)OCCCCN3                 | 4.301 | 3.838 | 4.712 | 4.394 | 5.131 | 74.838 |
| 569 <sup>29</sup> | CC(C)(C)c(c1)ccc1C2(CCC2)NC[C@@H](O)[C@@H](NC(=O)c(c3)cc(cc34)COC)C5cccc(c5)OCCCCN4          | 4.174 | 3.603 | 4.306 | 5.083 | 4.514 | 65.231 |
| 570 <sup>29</sup> | CC(C)(C)c(c1)ccc1C2(CCCC2)NC[C@@H](O)[C@@H](NC(=O)c(c3)cc(cc34)COC)C5cccc(c5)OCCCCN4         | 4.301 | 4.374 | 4.204 | 5.032 | 5.182 | 74.486 |
| 571 <sup>30</sup> | COc1ccc(cc1Br)C[C@@H](C2)[C@H](O)[C@H](CS2(=O)=O)NCc3cc(C(C)C)ccc3                           | 2.553 | 2.911 | 2.731 | 2.500 | 2.684 | 74.626 |
| 572 <sup>30</sup> | c1cccc1C[C@@H](C2)[C@H](O)[C@H](CS2(=O)=O)NCc3cc(C(C)C)ccc3                                  | 2.959 | 2.902 | 2.990 | 2.458 | 3.610 | 68.379 |
| 573 <sup>30</sup> | c1c(Br)cccc1C[C@@H](C2)[C@H](O)[C@H](CS2(=O)=O)NCc3cc(C(C)C)ccc3                             | 3.119 | 3.471 | 2.635 | 2.450 | 3.613 | 69.838 |
| 574 <sup>30</sup> | CCCOc(c1)ccc1C[C@@H](C2)[C@H](O)[C@H](CS2(=O)=O)NCc3cc(C(C)C)ccc3                            | 2.638 | 3.700 | 3.555 | 2.702 | 2.974 | 71.283 |
| 575 <sup>30</sup> | CCCOc(c1)ccc1C[C@@H](C2)[C@H](O)[C@H](CS2(=O)=O)NCc3cc(C(C)C)ccc3                            | 2.959 | 2.725 | 2.721 | 2.607 | 2.729 | 68.841 |
| 576 <sup>30</sup> | Oc1ccc(cc1)C[C@@H](C2)[C@H](O)[C@H](CS2(=O)=O)NCc3cc(C(C)C)ccc3                              | 2.745 | 2.349 | 2.420 | 2.453 | 2.635 | 64.003 |
|                   | c1ccc(C)cc1Cc2cc(ccc2O)C[C@@H](C3)[C@H](O)[C@H](CS3(=O)=O)                                   | 2.208 | 2.822 | 2.055 | 2.627 | 2.701 | 69.618 |

|                   |                                                                                                 |       |       |       |       |       |        |
|-------------------|-------------------------------------------------------------------------------------------------|-------|-------|-------|-------|-------|--------|
|                   | <chem>NCc4cc(C(C)C)ccc4</chem>                                                                  |       |       |       |       |       |        |
| 578 <sup>30</sup> | <chem>Oc1ccc(cc1CO)C[C@@H](C2)[C@H](O)[C@H](CS2(=O)=O)NCc3cc(C(C)C)ccc3</chem>                  | 2.921 | 2.695 | 2.591 | 2.382 | 2.677 | 70.060 |
| 579 <sup>30</sup> | <chem>OCCc1cc(ccc1O)C[C@@H](C2)[C@H](O)[C@H](CS2(=O)=O)NCc3cc(C(C)C)ccc3</chem>                 | 3.004 | 3.043 | 2.886 | 2.564 | 3.717 | 68.843 |
| 580 <sup>30</sup> | <chem>CCCCc1cc(ccc1O)C[C@@H](C2)[C@H](O)[C@H](CS2(=O)=O)NCc3cc(C(C)C)ccc3</chem>                | 3.824 | 3.554 | 2.803 | 3.566 | 4.727 | 68.477 |
| 581 <sup>30</sup> | <chem>CCCc1cc(ccc1O)C[C@@H](C2)[C@H](O)[C@H](CS2(=O)=O)NCc3cc(C(C)C)ccc3</chem>                 | 3.721 | 1.488 | 2.692 | 2.584 | 4.714 | 80.737 |
| 582 <sup>30</sup> | <chem>Oc1ccc(cc1CC)C[C@@H](C2)[C@H](O)[C@H](CS2(=O)=O)NCc3cc(C(C)C)ccc3</chem>                  | 3.432 | 3.852 | 4.171 | 2.564 | 3.679 | 59.149 |
| 583 <sup>30</sup> | <chem>Oc1ccc(cc1Br)C[C@@H](C2)[C@H](O)[C@H](CS2(=O)=O)NCc3cc(C(C)C)ccc3</chem>                  | 3.523 | 3.723 | 3.339 | 2.457 | 3.623 | 53.631 |
| 584 <sup>30</sup> | <chem>CNC(=O)Oc1ccc(cc1Br)C[C@@H](C2)[C@H](O)[C@H](CS2(=O)=O)NCc3cc(C(C)C)ccc3</chem>           | 4.222 | 4.748 | 3.684 | 3.583 | 4.719 | 55.277 |
| 585 <sup>30</sup> | <chem>Oc1ccc(cc1Br)C[C@@H](C2)[C@H](O)[C@H](CS2(=O)=O)NCc3ccccc3</chem>                         | 1.180 | 1.893 | 0.847 | 2.038 | 1.462 | 56.944 |
| 586 <sup>30</sup> | <chem>Oc1ccc(cc1Br)C[C@@H](C2)[C@H](O)[C@H](CS2(=O)=O)NCc3cc(ccn3)C(C)C</chem>                  | 2.367 | 2.497 | 2.233 | 2.542 | 2.634 | 52.166 |
| 587 <sup>30</sup> | <chem>Oc1ccc(cc1Br)C[C@@H](C2)[C@H](O)[C@H](CS2(=O)=O)NCc3cc(C(C)C)ccc3</chem>                  | 4.260 | 4.292 | 3.662 | 3.346 | 4.614 | 54.637 |
| 588 <sup>30</sup> | <chem>Oc1ccc(cc1Br)C[C@@H](C2)[C@H](O)[C@H](CS2(=O)=O)NCc3cc(ccc3)OC(C)C</chem>                 | 2.854 | 2.335 | 2.432 | 2.423 | 2.416 | 52.082 |
| 589 <sup>30</sup> | <chem>Oc1ccc(cc1Br)C[C@@H](C2)[C@H](O)[C@H](CS2(=O)=O)NCc3cc(Cl)cc(Cl)e3</chem>                 | 2.377 | 2.433 | 2.192 | 2.989 | 3.513 | 58.976 |
| 590 <sup>30</sup> | <chem>CCCN1C(=O)OC[C@H]1Cc2cc(ccc2O)C[C@@H](C3)[C@H](O)[C@H](CS3(=O)=O)NCc4cc(C(C)C)ccc4</chem> | 3.824 | 3.322 | 3.069 | 3.300 | 3.641 | 52.115 |
| 591 <sup>30</sup> | <chem>c1c(F)cc(F)cc1C[C@H](NC(=O)C)[C@H](O)CNCc2cc(C(C)C)ccc2</chem>                            | 2.495 | 2.691 | 1.559 | 2.491 | 2.922 | 53.654 |
| 592 <sup>31</sup> | <chem>c1c(F)cc(F)cc1C[C@H](NC(=O)C)[C@H](O)CNC2(CCCCC2)c3ccccc3C(C)C(C)C</chem>                 | 4.328 | 3.798 | 3.919 | 3.746 | 5.239 | 51.541 |
| 593 <sup>31</sup> | <chem>c1c(F)cc(F)cc1C[C@H](NC(=O)C)[C@H](O)CNC2(CCCCC2)c3cc1cc(c3)C(C)C(C)C</chem>              | 3.652 | 4.105 | 3.482 | 3.719 | 3.782 | 57.605 |
| 594 <sup>31</sup> | <chem>c1c(F)cc(F)cc1C[C@H](NC(=O)C)[C@H](O)CNC2(CCCCC2)c3ccccc3CC(C)C(C)C</chem>                | 2.678 | 2.434 | 2.320 | 3.801 | 2.902 | 48.960 |
| 595 <sup>31</sup> | <chem>c1c(F)cc(F)cc1C[C@H](NC(=O)C)[C@H](O)CNC2(CCCCC2)c3cc(F)cc(c3)C(C)C(C)C</chem>            | 4.337 | 3.925 | 4.196 | 4.162 | 5.298 | 59.745 |
| 596 <sup>31</sup> | <chem>c1c(F)cc(F)cc1C[C@H](NC(=O)C)[C@H](O)CNC2(CCCCC2)c3cc(Br)cc(c3)C(C)C(C)C</chem>           | 3.759 | 4.439 | 4.236 | 3.728 | 4.720 | 60.988 |
| 597 <sup>31</sup> | <chem>c1c(F)cc(F)cc1C[C@H](NC(=O)C)[C@H](O)CNC2(CCCCC2)c3cc(C)cc(c3)C(C)C(C)C</chem>            | 3.745 | 3.603 | 3.830 | 3.974 | 3.549 | 65.381 |
| 598 <sup>31</sup> | <chem>c1c(F)cc(F)cc1C[C@H](NC(=O)C)[C@H](O)CNC2(CCCCC2)c3cc(OC)c(c3)C(C)C(C)C</chem>            | 4.114 | 3.931 | 4.384 | 4.170 | 4.577 | 63.495 |
| 599 <sup>31</sup> | <chem>c1c(F)cc(F)cc1C[C@H](NC(=O)C)[C@H](O)CNC2(CCCCC2)c3cc(O)cc(c3)C(C)C(C)C</chem>            | 3.770 | 3.626 | 3.802 | 4.481 | 3.238 | 64.870 |
| 600 <sup>31</sup> | <chem>c1c(F)cc(F)cc1C[C@H](NC(=O)C)[C@H](O)CNC2(CCCCC2)c3cc(N)cc(c3)C(C)C(C)C</chem>            | 3.498 | 3.771 | 3.664 | 3.899 | 3.009 | 67.713 |
| 601 <sup>31</sup> | <chem>c1c(F)cc(F)cc1C[C@H](NC(=O)C)[C@H](O)CNC2(CCCCC2)c3cc(NS(=O)(=O)C)cc(c3)C(C)C(C)C</chem>  | 4.032 | 4.238 | 4.325 | 3.846 | 4.404 | 64.274 |
| 602 <sup>31</sup> | <chem>c1c(F)cc(F)cc1C[C@H](NC(=O)C)[C@H](O)CNC2(CCCCC2)c3cc(C(=O)C)cc(c3)C(C)C(C)C</chem>       | 3.796 | 3.910 | 4.340 | 3.655 | 3.188 | 63.727 |
| 603 <sup>31</sup> | <chem>c1c(F)cc(F)cc1C[C@H](NC(=O)C)[C@H](O)CNC2(CCCCC2)c3ccc(Br)c(c3)C(C)C(C)C</chem>           | 2.161 | 2.840 | 2.155 | 3.756 | 2.034 | 59.209 |
| 604 <sup>31</sup> | <chem>c1c(F)cc(F)cc1C[C@H](NC(=O)C)[C@H](O)CNC2(CCCCC2)c3scc(c3)CC(C)C(C)C</chem>               | 3.883 | 2.646 | 3.155 | 2.934 | 4.969 | 61.390 |
| 605 <sup>31</sup> | <chem>c1c(F)cc(F)cc1C[C@H](NC(=O)C)[C@H](O)CNC2(CCCCC2)c3ccc(s3)C(C)C</chem>                    | 2.397 | 2.902 | 4.374 | 2.627 | 2.148 | 65.148 |
| 606 <sup>31</sup> | <chem>c1c(F)cc(F)cc1C[C@H](NC(=O)C)[C@H](O)CNC2(CCCCC2)c3csc(c3)C(C)C</chem>                    | 3.495 | 2.614 | 3.468 | 3.418 | 3.594 | 67.276 |
| 607 <sup>31</sup> | <chem>c1c(F)cc(F)cc1C[C@H](NC(=O)C)[C@H](O)CNC2(CCCCC2)c3scc(c3)C(C)C</chem>                    | 3.453 | 4.077 | 3.137 | 3.079 | 3.689 | 64.177 |
| 608 <sup>31</sup> | <chem>c1c(F)cc(F)cc1C[C@H](NC(=O)C)[C@H](O)CNC2(CCCCC2)c3scc(c3)C(C)C(C)C</chem>                | 3.983 | 3.198 | 4.259 | 3.293 | 3.014 | 53.927 |
| 609 <sup>31</sup> | <chem>c1c(F)cc(F)cc1C[C@H](NC(=O)C)[C@H](O)CNC2(CCCCC2)c3scc(c3)C#C</chem>                      | 2.365 | 2.046 | 1.922 | 2.703 | 2.938 | 67.090 |
| 610 <sup>31</sup> | <chem>c1c(F)cc(F)cc1C[C@H](NC(=O)C)[C@H](O)CNC2(CCCCC2)c3scc(c3)CC</chem>                       | 2.759 | 3.617 | 2.878 | 2.886 | 3.581 | 65.289 |

|                   |                                                                                                 |       |       |       |       |       |        |
|-------------------|-------------------------------------------------------------------------------------------------|-------|-------|-------|-------|-------|--------|
| 611 <sup>31</sup> | c1e(F)cc(F)cc1C[C@H](NC(=O)C)[C@H](O)CNC2(CCCCC2)c3onc(e3)C(C)(C)C                              | 2.351 | 3.084 | 3.211 | 3.476 | 2.475 | 60.096 |
| 612 <sup>31</sup> | c1e(F)cc(F)cc1C[C@H](NC(=O)C)[C@H](O)CNC2(CCCCC2)c3onc(e3)CC(C)(C)C                             | 3.857 | 3.367 | 3.151 | 3.850 | 4.120 | 63.379 |
| 613 <sup>31</sup> | c1e(F)cc(F)cc1C[C@H](NC(=O)C)[C@H](O)CNC2(CCCCC2)c3nnn(e3)C[Si](C)(C)C                          | 3.812 | 3.870 | 3.269 | 3.545 | 4.872 | 59.873 |
| 614 <sup>31</sup> | c1e(F)cc(F)cc1C[C@H](NC(=O)C)[C@H](O)CNC2(CCCCC2)c3nnn(e3)C45C[C@@H]6C[C@H](C5)C[C@H](C4)C6     | 3.407 | 3.280 | 3.191 | 4.180 | 4.122 | 63.633 |
| 615 <sup>31</sup> | c1e(F)cc(F)cc1C[C@H](NC(=O)C)[C@H](O)CNC2(CCCCC2)c3occ(n3)C(C)(C)C                              | 0.861 | 1.447 | 1.119 | 1.215 | 1.568 | 70.501 |
| 616 <sup>31</sup> | c1e(F)cc(F)cc1C[C@H](NC(=O)C)[C@H](O)CNC2(CCCCC2)c3cnn(e3)C(C)(C)C                              | 2.735 | 2.807 | 3.654 | 3.013 | 3.557 | 54.567 |
| 617 <sup>31</sup> | c1e(F)cc(F)cc1C[C@H](NC(=O)C)[C@H](O)CNC2(CCCCC2)c3cnn(e3)CC(C)(C)C                             | 3.678 | 3.442 | 3.678 | 3.151 | 3.097 | 66.256 |
| 618 <sup>31</sup> | c1e(F)cc(F)cc1C[C@H](NC(=O)C)[C@H](O)CNC2(CCCCC2)c3ncc(o3)C(C)(C)C                              | 2.801 | 2.321 | 3.023 | 2.636 | 3.463 | 64.829 |
| 619 <sup>31</sup> | c1e(F)cc(F)cc1C[C@H](NC(=O)C)[C@H](O)CNC2(CC2)c3scc(e3)CC(C)(C)C                                | 3.328 | 3.420 | 3.219 | 2.805 | 4.001 | 66.292 |
| 620 <sup>31</sup> | c1e(F)cc(F)cc1C[C@H](NC(=O)C)[C@H](O)CNC2(CC2)c3cccc(e3)C(C)(C)C                                | 3.854 | 3.655 | 3.793 | 3.713 | 2.982 | 66.188 |
| 621 <sup>31</sup> | c1e(F)cc(F)cc1C[C@H](NC(=O)C)[C@H](O)CNC2(CC2)c3cccc(e3)CC(C)(C)C                               | 3.467 | 3.037 | 3.176 | 3.824 | 3.946 | 65.910 |
| 622 <sup>31</sup> | c1e(F)cc(F)cc1C[C@H](NC(=O)C)[C@H](O)CNC2(CC2)c3nccc(e3)C(C)(C)C                                | 3.194 | 3.251 | 3.401 | 3.676 | 3.981 | 61.659 |
| 623 <sup>31</sup> | c1e(F)cc(F)cc1C[C@H](NC(=O)C)[C@H](O)CNC2(CC2)c3encc(e3)CC(C)(C)C                               | 3.108 | 2.978 | 3.290 | 4.262 | 3.484 | 62.824 |
| 624 <sup>31</sup> | c1e(F)cc(F)cc1C[C@H](NC(=O)C)[C@H](O)CNC2(CC2)c3e[n+](O)cc(e3)CC(C)(C)C                         | 3.143 | 3.055 | 3.637 | 3.785 | 3.026 | 64.332 |
| 625 <sup>31</sup> | c1e(F)cc(F)cc1C[C@H](NC(=O)C)[C@H](O)CNC2(CCCCC2)c3ncnc(e3)C(C)(C)C                             | 2.614 | 2.675 | 3.647 | 3.709 | 2.840 | 63.036 |
| 626 <sup>31</sup> | c1e(F)cc(F)cc1C[C@H](NC(=O)C)[C@H](O)CNC2(CC2)c3ccc(s3)CC(C)(C)C                                | 2.790 | 3.690 | 3.108 | 2.134 | 3.790 | 64.939 |
| 627 <sup>31</sup> | c1e(F)cc(F)cc1C[C@H](NC(=O)C)[C@H](O)CNC2(CC2)c3ncc(o3)C(C)(C)C                                 | 2.310 | 2.358 | 2.317 | 2.073 | 2.861 | 60.571 |
| 628 <sup>31</sup> | c1e(F)cc(F)cc1C[C@H](NC(=O)C)[C@H](O)CNC2(CC2)c3occ(n3)C(C)(C)C                                 | 1.368 | 2.014 | 1.859 | 1.724 | 2.233 | 55.664 |
| 629 <sup>31</sup> | c1e(F)cc(F)cc1C[C@H](NC(=O)C)[C@H](O)CNC2(CC2)c3scc(n3)CC(C)(C)C                                | 2.029 | 1.983 | 2.144 | 2.527 | 2.602 | 41.690 |
| 630 <sup>31</sup> | c1e(F)cc(F)cc1C[C@H](NC(=O)C)[C@H](O)CNC2(CC2)c3esc(n3)CC(C)(C)C                                | 2.516 | 2.056 | 2.957 | 2.593 | 2.885 | 40.830 |
| 631 <sup>31</sup> | c1e(F)cc(F)cc1C[C@H](NC(=O)C)[C@H](O)CNC2(CC2)c3enn(e3)CC(C)(C)C                                | 3.461 | 3.595 | 2.528 | 3.183 | 3.215 | 42.602 |
| 632 <sup>31</sup> | c1e(F)cc(F)cc1C[C@H](NC(=O)C)[C@H](O)CNC2(CC2)c3ecn(n3)CC(C)(C)C                                | 3.060 | 3.211 | 2.978 | 3.735 | 2.846 | 46.419 |
| 633 <sup>31</sup> | c1e(F)cc(F)cc1C[C@H](NC(=O)C)[C@H](O)CNC2(CC2)c3nnn(e3)CC(C)(C)C                                | 3.347 | 3.134 | 3.546 | 2.810 | 3.823 | 51.607 |
| 634 <sup>32</sup> | CCCN(CCC)C(=O)c1cc(cc(e1)C)C(=O)N[C@@H](Cc2cc(F)cc(F)e2)[C@H](O)CNCc3cc(OC)ccc3                 | 4.699 | 4.878 | 3.942 | 4.868 | 4.873 | 53.547 |
| 635 <sup>32</sup> | CCCN(CCC)C(=O)c1cc(cc(e1)C)C(=O)N[C@@H](Cc2cc(F)cc(F)e2)[C@H](O)CNCc3cc(OC)ccc3                 | 4.699 | 4.098 | 4.588 | 4.773 | 5.697 | 60.398 |
| 636 <sup>32</sup> | CCCN(CCC)C(=O)c1cc(cc(e1)CC(=O)C)C(=O)N[C@@H](Cc2cc(F)cc(F)e2)[C@H](O)CNCc3cc(OC)ccc3           | 5.398 | 5.415 | 4.704 | 4.789 | 5.087 | 55.139 |
| 637 <sup>32</sup> | CCCN(CCC)C(=O)c1cc(cc(e1)C/C(C)=N/O)C(=O)N[C@@H](Cc2cc(F)cc(F)e2)[C@H](O)CNCc3cc(OC)ccc3        | 5.523 | 5.140 | 5.196 | 4.808 | 5.029 | 58.077 |
| 638 <sup>32</sup> | CCCN(CCC)C(=O)c1cc(cc(e1)C/C(C)=N/OC)C(=O)N[C@@H](Cc2cc(F)cc(F)e2)[C@H](O)CNCc3cc(OC)ccc3       | 6.000 | 5.138 | 5.757 | 4.529 | 5.366 | 73.769 |
| 639 <sup>32</sup> | C=CCO\N=C(C)Cc(e1)cc(cc1C(=O)N(CCC)CCC)C(=O)N[C@@H](Cc2cc(F)cc(F)e2)[C@H](O)CNCc3cc(OC)ccc3     | 5.000 | 5.105 | 4.850 | 4.737 | 4.196 | 64.267 |
| 640 <sup>32</sup> | CC(C)CO\N=C(C)Cc(e1)cc(cc1C(=O)N(CCC)CCC)C(=O)N[C@@H](Cc2cc(F)cc(F)e2)[C@H](O)CNCc3cc(OC)ccc3   | 4.260 | 4.326 | 4.630 | 4.525 | 3.846 | 68.978 |
| 641 <sup>32</sup> | e1cccc1CO\N=C(C)Cc(e2)cc(cc2C(=O)N(CCC)CCC)C(=O)N[C@@H](Cc3cc(F)cc(F)e3)[C@H](O)CNCc4cc(OC)ccc4 | 4.174 | 4.087 | 4.395 | 4.713 | 3.285 | 55.012 |
| 642 <sup>32</sup> | CCCN(CCC)C(=O)c1cc(cc(e1)C[C@H](O)C)C(=O)N[C@@H](Cc2cc(F)cc(F)e2)[C@H](O)CNCc3cc(OC)ccc3        | 5.699 | 5.864 | 5.528 | 4.576 | 5.079 | 53.802 |
| 643 <sup>32</sup> | CCCN(CCC)C(=O)c1cc(cc(e1)CC[C@H](C)O)C(=O)N[C@@H](Cc2cc(F)cc(F)e2)[C@H](O)CNCc3cc(OC)ccc3       | 4.796 | 4.758 | 4.686 | 4.821 | 5.228 | 72.616 |

|                   |                                                                                                          |       |       |       |       |       |        |
|-------------------|----------------------------------------------------------------------------------------------------------|-------|-------|-------|-------|-------|--------|
| 644 <sup>32</sup> | CCCN(CCC)C(=O)c1cc(cc(c1)CCCO)C(=O)N[C@@H](Cc2cc(F)cc(F)c2)[C@H](O)CNCc3cc(OC)ccc3                       | 5.000 | 5.445 | 4.760 | 4.751 | 5.460 | 70.307 |
| 645 <sup>32</sup> | CCCN(CCC)C(=O)c1cc(cc(c1)C[C@@H](N)C)C(=O)N[C@@H](Cc2cc(F)cc(F)c2)[C@H](O)CNCc3cc(OC)ccc3                | 3.910 | 4.296 | 4.454 | 4.578 | 4.661 | 68.702 |
| 646 <sup>32</sup> | CCCN(CCC)C(=O)c1cc(cc(c1)C[C@H](C)NC(=O)C)C(=O)N[C@@H](Cc2cc(F)cc(F)c2)[C@H](O)CNCc3cc(OC)ccc3           | 4.699 | 5.168 | 5.182 | 4.731 | 4.413 | 63.211 |
| 647 <sup>32</sup> | c1cccc1[C@@H](C)NC(=O)c2cc(ccc2)C(=O)N[C@@H](Cc3cc(F)cc(F)c3)[C@H](O)CNCc4cc(OC)ccc4                     | 4.051 | 3.638 | 3.560 | 4.193 | 3.836 | 56.278 |
| 648 <sup>32</sup> | c1cccc1[C@@H](C)NC(=O)c2cc(cc(c2)CC(=O)C)C(=O)N[C@@H](Cc3cc(F)cc(F)c3)[C@H](O)CNCc4cc(OC)ccc4            | 4.699 | 4.487 | 4.536 | 4.401 | 4.365 | 76.437 |
| 649 <sup>32</sup> | c1cccc1[C@@H](C)NC(=O)c2cc(cc(c2)C[C@H](O)C)C(=O)N[C@@H](Cc3cc(F)cc(F)c3)[C@H](O)CNCc4cc(OC)ccc4         | 4.538 | 4.872 | 4.606 | 4.198 | 5.493 | 76.461 |
| 650 <sup>32</sup> | c1cccc1[C@@H](C)NC(=O)c2cc(cc(c2)C/C(C)=N/OC)C(=O)N[C@@H](Cc3cc(F)cc(F)c3)[C@H](O)CNCc4cc(OC)ccc4        | 4.495 | 3.980 | 4.083 | 4.386 | 4.369 | 70.161 |
| 651 <sup>32</sup> | c1cccc1[C@@H](C)NC(=O)c2cc(cc(c2)C/C(C)=N/OCC=C)C(=O)N[C@@H](Cc3cc(F)cc(F)c3)[C@H](O)CNCc4cc(OC)ccc4     | 4.066 | 4.259 | 3.783 | 4.310 | 4.389 | 60.846 |
| 652 <sup>32</sup> | c1cc(F)ccc1[C@@H](C)NC(=O)c2cc(ccc2)C(=O)N[C@@H](Cc3cc(F)cc(F)c3)[C@H](O)CNCc4cc(OC)ccc4                 | 3.780 | 4.459 | 4.193 | 4.239 | 3.408 | 60.682 |
| 653 <sup>32</sup> | c1cc(F)ccc1[C@H](C)NC(=O)c2cc(cc(c2)CC(=O)C)C(=O)N[C@@H](Cc3cc(F)cc(F)c3)[C@H](O)CNCc4cc(OC)ccc4         | 4.292 | 4.109 | 4.092 | 4.447 | 4.140 | 55.170 |
| 654 <sup>32</sup> | c1cc(F)ccc1[C@H](C)NC(=O)c2cc(cc(c2)C[C@H](O)C)C(=O)N[C@@H](Cc3cc(F)cc(F)c3)[C@H](O)CNCc4cc(OC)ccc4      | 4.432 | 4.368 | 4.339 | 4.245 | 4.533 | 65.224 |
| 655 <sup>32</sup> | c1cc(F)ccc1[C@@H](C)NC(=O)c2cc(cc(c2)C/C(C)=N/OC)C(=O)N[C@@H](Cc3cc(F)cc(F)c3)[C@H](O)CNCc4cc(OC)ccc4    | 4.620 | 4.959 | 4.843 | 4.433 | 4.395 | 60.704 |
| 656 <sup>32</sup> | c1cc(F)ccc1[C@@H](C)NC(=O)c2cc(cc(c2)C/C(C)=N/OCC=C)C(=O)N[C@@H](Cc3cc(F)cc(F)c3)[C@H](O)CNCc4cc(OC)ccc4 | 3.775 | 3.950 | 4.031 | 4.357 | 3.365 | 66.174 |
| 657 <sup>32</sup> | C1CCCN(S1(=O)=O)c2cc(ccc2)C(=O)N[C@@H](Cc3cc(F)cc(F)c3)[C@H](O)CNCc4cc(OC)ccc4                           | 4.131 | 3.890 | 3.148 | 3.468 | 4.939 | 69.172 |
| 658 <sup>32</sup> | C1CCCN(S1(=O)=O)c2cc(cc(c2)CC(=O)C)C(=O)N[C@@H](Cc3cc(F)cc(F)c3)[C@H](O)CNCc4cc(OC)ccc4                  | 4.046 | 3.720 | 3.883 | 4.539 | 4.669 | 71.171 |
| 659 <sup>32</sup> | C1CCCN(S1(=O)=O)c2cc(cc(c2)C[C@H](O)C)C(=O)N[C@@H](Cc3cc(F)cc(F)c3)[C@H](O)CNCc4cc(OC)ccc4               | 4.367 | 4.376 | 3.688 | 4.579 | 4.683 | 69.704 |
| 660 <sup>32</sup> | C1CCCN(S1(=O)=O)c2cc(cc(c2)C/C(C)=N/OC)C(=O)N[C@@H](Cc3cc(F)cc(F)c3)[C@H](O)CNCc4cc(OC)ccc4              | 4.420 | 4.024 | 4.704 | 4.273 | 4.121 | 64.206 |
| 661 <sup>32</sup> | C1CCCN(S1(=O)=O)c2cc(cc(c2)C/C(C)=N/OC)C(=O)N[C@@H](Cc3cc(F)cc(F)c3)[C@H](O)CNCc4cc(OC)ccc4              | 4.284 | 4.544 | 4.388 | 4.223 | 4.596 | 68.409 |
| 662 <sup>32</sup> | CCCO\N=C(C)Cc(c1)cc(cc1N(S2(=O)=O)CCCC2)C(=O)N[C@@H](Cc3cc(F)cc(F)c3)[C@H](O)CNCc4cc(OC)ccc4             | 4.602 | 4.498 | 4.447 | 4.227 | 5.671 | 62.955 |
| 663 <sup>32</sup> | C=CCO\N=C(C)Cc(c1)cc(cc1N(S2(=O)=O)CCCC2)C(=O)N[C@@H](Cc3cc(F)cc(F)c3)[C@H](O)CNCc4cc(OC)ccc4            | 3.955 | 3.888 | 3.084 | 4.152 | 3.708 | 67.251 |
| 664 <sup>32</sup> | CC(C)CO\N=C(C)Cc(c1)cc(cc1N(S2(=O)=O)CCCC2)C(=O)N[C@@H](Cc3cc(F)cc(F)c3)[C@H](O)CNCc4cc(OC)ccc4          | 3.369 | 3.800 | 3.690 | 4.236 | 3.171 | 64.813 |
| 665 <sup>32</sup> | c1cccc1CO\N=C(C)Cc(c2)cc(cc2N(S3(=O)=O)CCCC3)C(=O)N[C@@H](Cc4cc(F)cc(F)c4)[C@H](O)CNCc5cc(OC)ccc5        | 4.509 | 4.064 | 3.512 | 4.393 | 4.959 | 67.451 |
| 666 <sup>32</sup> | CS(=O)(=O)N(C)C)c1cc(ccc1)C(=O)N[C@@H](Cc2cc(F)cc(F)c2)[C@H](O)CNCc3cc(OC)ccc3                           | 4.125 | 3.476 | 3.055 | 4.220 | 4.715 | 82.532 |
| 667 <sup>32</sup> | CS(=O)(=O)N(C)C)c1cc(cc(c1)CC(=O)C)C(=O)N[C@@H](Cc2cc(F)cc(F)c2)[C@H](O)CNCc3cc(OC)ccc3                  | 3.907 | 3.268 | 4.117 | 4.180 | 3.601 | 76.575 |
| 668 <sup>32</sup> | CS(=O)(=O)N(C)C)c1cc(cc(c1)C[C@@H](O)C)C(=O)N[C@@H](Cc2cc(F)cc(F)c2)[C@H](O)CNCc3cc(OC)ccc3              | 4.367 | 3.585 | 4.185 | 4.206 | 4.526 | 60.982 |
| 669 <sup>32</sup> | O\N=C(C)Cc(c1)cc(cc1N(C)S(=O)(=O)C)C(=O)N[C@@H](Cc2cc(F)cc(F)c2)[C@H](O)CNCc3cc(OC)ccc3                  | 4.119 | 4.364 | 4.515 | 3.916 | 4.728 | 63.729 |
| 670 <sup>32</sup> | CO\N=C(C)Cc(c1)cc(cc1N(C)S(=O)(=O)C)C(=O)N[C@@H](Cc2cc(F)cc(F)c2)[C@H](O)CNCc3cc(OC)ccc3                 | 4.222 | 4.794 | 4.215 | 3.866 | 4.639 | 66.271 |
| 671 <sup>32</sup> | CCCO\N=C(C)Cc(c1)cc(cc1N(C)S(=O)(=O)C)C(=O)N[C@@H](Cc2cc(F)cc(F)c2)[C@H](O)CNCc3cc(OC)ccc3               | 4.229 | 3.731 | 3.505 | 3.869 | 4.532 | 63.712 |
| 672 <sup>32</sup> | C=CCO\N=C(C)Cc(c1)cc(cc1N(C)S(=O)(=O)C)C(=O)N[C@@H](Cc2cc(F)cc(F)c2)[C@H](O)CNCc3cc(OC)ccc3              | 3.821 | 3.415 | 4.239 | 3.794 | 4.244 | 42.599 |
| 673 <sup>32</sup> | CC(C)CO\N=C(C)Cc(c1)cc(cc1N(C)S(=O)(=O)C)C(=O)N[C@@H](Cc2cc(F)cc(F)c2)[C@H](O)CNCc3cc(OC)ccc3            | 3.762 | 3.818 | 4.249 | 3.878 | 3.322 | 61.321 |
| 674 <sup>32</sup> | c1cccc1CO\N=C(C)Cc(c2)cc(cc2N(C)S(=O)(=O)C)C(=O)N[C@@H](Cc3cc(F)cc(F)c3)[C@H](O)CNCc4cc(OC)ccc4          | 5.046 | 5.803 | 4.655 | 4.036 | 5.376 | 59.844 |
| 675 <sup>32</sup> | c1cccc1N(S(=O)(=O)C)c2cc(ccc2)C(=O)N[C@@H](Cc3cc(F)cc(F)c3)[C@H](O)CNCc4cc(OC)ccc4                       | 4.959 | 4.650 | 4.651 | 4.962 | 5.280 | 55.366 |
| 676 <sup>32</sup> | c1cccc1N(S(=O)(=O)C)c2cc(cc(c2)CC(=O)C)C(=O)N[C@@H](Cc3cc(F)cc(F)c3)[C@H](O)CNCc4cc(OC)ccc4              | 4.770 | 4.832 | 4.906 | 5.088 | 4.385 | 63.341 |

|                   |                                                                                                        |       |       |       |       |       |        |
|-------------------|--------------------------------------------------------------------------------------------------------|-------|-------|-------|-------|-------|--------|
| 677 <sup>32</sup> | c1cccc1N(S(=O)(=O)C)c2cc(cc(e2)C/C(C)=N/O)C(=O)N[C@@H](Cc3cc(F)cc(F)c3)[C@H](O)CNCc4cc(OC)ccc4         | 5.046 | 5.793 | 5.404 | 4.821 | 6.067 | 43.705 |
| 678 <sup>32</sup> | c1cccc1N(S(=O)(=O)C)c2cc(cc(e2)C/C(C)=N/O)C(=O)N[C@@H](Cc3cc(F)cc(F)c3)[C@H](O)CNCc4cc(OC)ccc4         | 5.000 | 4.569 | 4.424 | 4.781 | 6.096 | 56.498 |
| 679 <sup>32</sup> | CCCO\N=C(C)\Cc(c1)cc(cc1N(S(=O)(=O)C)c2cccc2)C(=O)N[C@@H](Cc3cc(F)cc(F)c3)[C@H](O)CNCc4cc(OC)ccc4      | 5.222 | 4.858 | 5.030 | 4.785 | 4.931 | 41.320 |
| 680 <sup>32</sup> | C=CCO\N=C(C)\Cc(c1)cc(cc1N(S(=O)(=O)C)c2cccc2)C(=O)N[C@@H](Cc3cc(F)cc(F)c3)[C@H](O)CNCc4cc(OC)ccc4     | 4.569 | 5.110 | 4.310 | 4.709 | 5.624 | 56.121 |
| 681 <sup>32</sup> | CC(C)CO\N=C(C)\Cc(c1)cc(cc1N(S(=O)(=O)C)c2cccc2)C(=O)N[C@@H](Cc3cc(F)cc(F)c3)[C@H](O)CNCc4cc(OC)ccc4   | 3.616 | 4.523 | 4.188 | 3.793 | 3.406 | 43.909 |
| 682 <sup>32</sup> | c1cccc1CO\N=C(C)\Cc(c2)cc(cc2N(S(=O)(=O)C)c3cccc3)C(=O)N[C@@H](Cc4cc(F)cc(F)c4)[C@H](O)CNCc5cc(OC)ccc5 | 4.921 | 5.342 | 4.927 | 4.951 | 5.191 | 70.407 |
| 683 <sup>32</sup> | c1cccc1O(c2)cc(cc2C(=O)N(CCC)CCC)C(=O)N[C@@H](Cc3cc(F)cc(F)c3)[C@H](O)CNCc4cc(OC)ccc4                  | 5.000 | 5.015 | 4.727 | 4.735 | 5.605 | 66.736 |
| 684 <sup>32</sup> | c1cc(OC)ccc1O(c2)cc(cc2C(=O)N(CCC)CCC)C(=O)N[C@@H](Cc3cc(F)cc(F)c3)[C@H](O)CNCc4cc(OC)ccc4             | 5.000 | 5.008 | 4.774 | 4.633 | 5.408 | 64.021 |
| 685 <sup>32</sup> | c1cccc(OC)c1O(c2)cc(cc2C(=O)N(CCC)CCC)C(=O)N[C@@H](Cc3cc(F)cc(F)c3)[C@H](O)CNCc4cc(OC)ccc4             | 4.268 | 4.625 | 4.391 | 4.761 | 3.996 | 65.986 |
| 686 <sup>32</sup> | c1cc(F)ccc1O(c2)cc(cc2C(=O)N(CCC)CCC)C(=O)N[C@@H](Cc3cc(F)cc(F)c3)[C@H](O)CNCc4cc(OC)ccc4              | 4.658 | 4.527 | 4.992 | 4.701 | 4.414 | 58.279 |
| 687 <sup>32</sup> | c1cccc1Se(c2)cc(cc2C(=O)N(CCC)CCC)C(=O)N[C@@H](Cc3cc(F)cc(F)c3)[C@H](O)CNCc4cc(OC)ccc4                 | 4.886 | 4.651 | 4.501 | 4.846 | 4.383 | 60.995 |
| 688 <sup>32</sup> | c1cc(OC)ccc1Se(c2)cc(cc2C(=O)N(CCC)CCC)C(=O)N[C@@H](Cc3cc(F)cc(F)c3)[C@H](O)CNCc4cc(OC)ccc4            | 4.569 | 4.569 | 4.763 | 4.556 | 5.596 | 36.679 |
| 689 <sup>32</sup> | c1cccc1S(=O)(=O)c(c2)cc(cc2C(=O)N(CCC)CCC)C(=O)N[C@@H](Cc3cc(F)cc(F)c3)[C@H](O)CNCc4cc(OC)ccc4         | 4.959 | 5.383 | 5.166 | 4.898 | 5.140 | 60.603 |
| 690 <sup>32</sup> | c1cc(OC)ccc1S(=O)(=O)c(c2)cc(cc2C(=O)N(CCC)CCC)C(=O)N[C@@H](Cc3cc(F)cc(F)c3)[C@H](O)CNCc4cc(OC)ccc4    | 4.921 | 4.842 | 4.513 | 4.908 | 5.130 | 49.163 |
| 691 <sup>33</sup> | c1cccc1-c2n(CC(=O)N/C(N)=N/[H])c(cc2)-c3ccc(cc3)NC(=O)c4c(Cl)cc(Cl)cc4                                 | 2.921 | 2.993 | 3.728 | 3.143 | 3.833 | 66.006 |
| 692 <sup>33</sup> | c1cccc1-c2n(CC(=O)N/C(N)=N/[H])c(cc2)-c3ccc(cc3)NC(=O)c4cc(C)ccc4                                      | 3.222 | 3.332 | 3.246 | 2.998 | 3.601 | 73.603 |
| 693 <sup>33</sup> | c1cccc1-c2n(CC(=O)N/C(N)=N/[H])c(cc2)-c3ccc(cc3)NC(=O)c4cc(OC)ccc4                                     | 2.745 | 3.015 | 2.792 | 3.072 | 3.247 | 64.261 |
| 694 <sup>33</sup> | c1cccc1-c2n(CC(=O)N/C(N)=N/[H])c(cc2)-c3ccc(cc3)NC(=O)c4ccc(Br)cc4                                     | 2.854 | 2.772 | 2.861 | 3.139 | 3.057 | 73.852 |
| 695 <sup>33</sup> | c1cccc1-c2n(CC(=O)N/C(N)=N/[H])c(cc2)-c3ccc(cc3)OCC                                                    | 2.796 | 3.045 | 3.097 | 2.879 | 2.937 | 52.620 |
| 696 <sup>33</sup> | c1cccc1-c2n(CC(=O)N/C(N)=N/[H])c(cc2)-c3ccc(cc3)OCC=C                                                  | 2.770 | 2.390 | 2.211 | 2.799 | 2.179 | 60.552 |
| 697 <sup>33</sup> | c1cccc1-c2n(CC(=O)N/C(N)=N/[H])c(cc2)-c3ccc(cc3)OCCCC#N                                                | 3.046 | 3.221 | 3.130 | 2.864 | 3.299 | 30.027 |
| 698 <sup>33</sup> | c1cccc1-c2n(CC(=O)N/C(N)=N/[H])c(cc2)-c3ccc(cc3)OCCCC                                                  | 2.745 | 3.214 | 3.094 | 2.840 | 2.241 | 68.015 |
| 699 <sup>33</sup> | c1cccc1-c2n(CC(=O)N/C(N)=N/[H])c(cc2)-c3ccc(cc3)OCC4ccc(C#N)cc4                                        | 2.721 | 2.201 | 2.675 | 2.833 | 2.793 | 42.904 |
| 700 <sup>34</sup> | C1CCC(=O)N1c2cc(NCC)cc(c2)C(=O)N[C@@H](Cc3cccc3)[C@H](O)CNC4CCCCC4                                     | 3.745 | 3.179 | 3.599 | 3.777 | 4.334 | 47.518 |
| 701 <sup>34</sup> | C1CCC(=O)N1c2cc(NCC)cc(c2)C(=O)N[C@@H](Cc3cccc3)[C@H](O)CNC4CCCCC4                                     | 2.951 | 4.078 | 3.012 | 3.854 | 3.025 | 68.069 |
| 702 <sup>34</sup> | C1CCC(=O)N1c2cc(NCC)cc(c2)C(=O)N[C@@H](Cc3cccc3)[C@H](O)CNC4CCCCC4                                     | 2.611 | 2.727 | 3.502 | 3.803 | 2.940 | 64.042 |
| 703 <sup>34</sup> | C1CCC(=O)N1c2cc(NCC)cc(c2)C(=O)N[C@@H](Cc3cccc3)[C@H](O)CNC4CCSCC4                                     | 3.187 | 3.786 | 3.081 | 3.746 | 3.338 | 62.396 |
| 704 <sup>34</sup> | C1CCC(=O)N1c2cc(NCC)cc(c2)C(=O)N[C@@H](Cc3cccc3)[C@H](O)CN[C@@H](C)C(=C)CC4CCCCC4                      | 2.230 | 2.742 | 2.619 | 3.036 | 2.657 | 66.649 |
| 705 <sup>34</sup> | C1CCC(=O)N1c2cc(NCC)cc(c2)C(=O)N[C@@H](Cc3cccc3)[C@H](O)CN[C@H](C)CCCC(C)C                             | 4.481 | 3.950 | 4.479 | 3.792 | 4.638 | 65.455 |
| 706 <sup>34</sup> | C1CCC(=O)N1c2cc(NCC)cc(c2)C(=O)N[C@@H](Cc3cccc3)[C@H](O)CNC(C)(C)CCCC(C)C                              | 4.481 | 4.304 | 4.668 | 3.805 | 4.313 | 74.593 |
| 707 <sup>34</sup> | C1CCC(=O)N1c2cc(NCC)cc(c2)C(=O)N[C@@H](Cc3cccc3)[C@H](O)CNC(C)(C)CCCC(C)C                              | 3.516 | 3.209 | 2.590 | 3.780 | 3.214 | 67.426 |
| 708 <sup>34</sup> | C1CCC(=O)N1c2cc(NCC)cc(c2)C(=O)N[C@@H](Cc3cccc3)[C@H](O)CNC(C)(C)CCCC                                  | 3.260 | 3.478 | 3.774 | 3.780 | 4.208 | 70.034 |
| 709 <sup>34</sup> | C1CCC(=O)N1c2cc(NCC)cc(c2)C(=O)N[C@@H](Cc3cccc3)[C@H](O)CNC(C)(C)COCC(C)C                              | 3.102 | 3.963 | 4.066 | 3.606 | 2.821 | 68.160 |
| 710 <sup>34</sup> | C1CCC(=O)N1c2cc(NCC)cc(c2)C(=O)N[C@@H](Cc3cccc3)[C@H](O)CNCc4cccc(c4)OC                                | 4.367 | 4.363 | 4.016 | 4.390 | 3.892 | 52.790 |
| 711 <sup>34</sup> | C1CCC(=O)N1c2cc(NCC)cc(c2)C(=O)N[C@@H](Cc3cccc3)[C@H](O)CNCc4cccc4                                     | 3.119 | 3.379 | 3.372 | 3.255 | 3.881 | 71.994 |
|                   | C1CCC(=O)N1c2cc(NCC)cc(c2)C(=O)N[C@@H](Cc3cccc3)[C@H](O)                                               | 4.770 | 3.640 | 4.218 | 4.551 | 4.182 | 73.056 |

|                   |                                                                                            |       |       |       |       |       |        |
|-------------------|--------------------------------------------------------------------------------------------|-------|-------|-------|-------|-------|--------|
|                   | CNC(C)(C)c4ccce(c4)C(F)(F)F                                                                |       |       |       |       |       |        |
| 713 <sup>34</sup> | C1CCC(=O)N1c2cc(NCC)cc(c2)C(=O)N[C@@H](Cc3ccccc3)[C@H](O)CNCc4ccccc4OC                     | 2.870 | 3.839 | 3.740 | 3.369 | 2.535 | 67.089 |
| 714 <sup>34</sup> | C1CCC(=O)N1c2cc(NCC)cc(c2)C(=O)N[C@@H](Cc3ccccc3)[C@H](O)CNCc4ccc(cc4)OC                   | 2.680 | 2.917 | 3.424 | 3.258 | 2.881 | 71.033 |
| 715 <sup>34</sup> | C1CCC(=O)N1c2cc(NCC)cc(c2)C(=O)N[C@@H](Cc3ccccc3)[C@H](O)CNCc4ccccc4                       | 2.770 | 3.663 | 3.452 | 3.653 | 3.173 | 71.587 |
| 716 <sup>34</sup> | C1CCC(=O)N1c2cc(NCC)cc(c2)C(=O)N[C@@H](Cc3ccccc3)[C@H](O)CNCc4ccccc4                       | 3.222 | 3.258 | 3.824 | 4.038 | 3.859 | 68.973 |
| 717 <sup>34</sup> | C1CCC(=O)N1c2cc(NCC)cc(c2)C(=O)N[C@@H](Cc3ccccc3)[C@H](O)CN[C@@H]4CCc(c45)cccc5            | 3.796 | 3.627 | 3.409 | 4.564 | 4.747 | 68.325 |
| 718 <sup>34</sup> | C1CCC(=O)N1c2cc(NCC)cc(c2)C(=O)N[C@@H](Cc3ccccc3)[C@H](O)CN[C@@H]4CCc(c45)cccc5            | 1.460 | 1.353 | 2.376 | 1.564 | 1.397 | 70.460 |
| 719 <sup>34</sup> | C1CCC(=O)N1c2cc(NCC)cc(c2)C(=O)N[C@@H](Cc3ccccc3)[C@H](O)CNC4(CCCCC4)c5cccc(c5)OC          | 4.854 | 5.376 | 5.213 | 4.856 | 5.501 | 75.113 |
| 720 <sup>34</sup> | C1CCC(=O)N1c2cc(NCC)cc(c2)C(=O)N[C@@H](Cc3ccccc3)[C@H](O)CNCc4cccc(c4)OC(F)(F)F            | 4.699 | 4.325 | 3.862 | 4.587 | 5.348 | 73.522 |
| 721 <sup>34</sup> | C1CCC(=O)N1c2cc(NCC)cc(c2)C(=O)N[C@@H](Cc3ccccc3)[C@H](O)CNCc4cccc(Cl)c4                   | 4.081 | 3.913 | 3.627 | 4.244 | 4.041 | 80.114 |
| 722 <sup>34</sup> | C1CCC(=O)N1c2cc(NCC)cc(c2)C(=O)N[C@@H](Cc3ccccc3)[C@H](O)CNCc4cc(OC)cc(c4)OC               | 4.000 | 4.414 | 3.998 | 4.671 | 4.687 | 72.932 |
| 723 <sup>34</sup> | C1CCC(=O)N1c2cc(NCC)cc(c2)C(=O)N[C@@H](Cc3ccccc3)[C@H](O)CNCc4cccc(n4)OC                   | 3.481 | 3.672 | 4.468 | 4.154 | 4.419 | 73.951 |
| 724 <sup>34</sup> | C1CCC(=O)N1c2cc(NCC)cc(c2)C(=O)N[C@@H](Cc3ccccc3)[C@H](O)CNCc4enn(c4)CC                    | 3.638 | 3.193 | 3.807 | 4.248 | 3.177 | 69.779 |
| 725 <sup>35</sup> | C1CS(=O)(=O)N(C)C(c2c13)cc(cc2n(c3)CC)C(=O)N[C@@H](Cc4ccccc4)[C@H](O)CNC5CCOCC5            | 5.301 | 5.568 | 4.681 | 4.253 | 6.220 | 69.602 |
| 726 <sup>35</sup> | C1CS(=O)(=O)N(C)C(c2n13)cc(cc2c(c3)CC)C(=O)N[C@@H](Cc4ccccc4)[C@H](O)CNC5CCOCC5            | 4.824 | 4.619 | 4.685 | 4.851 | 5.064 | 68.366 |
| 727 <sup>35</sup> | C1CS(=O)(=O)N(C)C(c2c13)cc(cc2n(c3)CC)C(=O)N[C@@H]([C@H](O)C)NCCC(F)(F)Fc4ccccc4           | 5.398 | 5.777 | 4.415 | 5.152 | 4.443 | 81.346 |
| 728 <sup>35</sup> | C1CS(=O)(=O)N(C)C(c2n13)cc(cc2c(c3)CC)C(=O)N[C@@H]([C@H](O)C)NCCC(F)(F)Fc4ccccc4           | 5.155 | 5.562 | 4.523 | 4.750 | 5.457 | 90.827 |
| 729 <sup>35</sup> | C1CS(=O)(=O)N(C)C(c2c13)cc(cc2n(c3)CC)C(=O)N[C@@H]([C@H](O)C)N[C@@H](C)CCc4ccccc4          | 5.000 | 4.248 | 4.222 | 4.222 | 5.798 | 70.541 |
| 730 <sup>35</sup> | C1CS(=O)(=O)N(C)C(c2n13)cc(cc2c(c3)CC)C(=O)N[C@@H]([C@H](O)C)N[C@@H](C)CCc4ccccc4          | 4.658 | 4.464 | 4.633 | 4.820 | 4.813 | 83.230 |
| 731 <sup>35</sup> | C1CS(=O)(=O)N(C)C(c2c13)cc(cc2n(c3)CC)C(=O)N[C@@H]([C@H](O)C)NCC#C)c4ccccc4                | 4.959 | 4.049 | 4.054 | 4.413 | 5.870 | 78.811 |
| 732 <sup>35</sup> | C1CS(=O)(=O)N(C)C(c2n13)cc(cc2c(c3)CC)C(=O)N[C@@H]([C@H](O)C)NCC#C)c4ccccc4                | 4.137 | 3.430 | 3.140 | 5.011 | 4.957 | 69.383 |
| 733 <sup>35</sup> | C1CS(=O)(=O)N(C)C(c2c13)cc(cc2n(c3)CC)C(=O)N[C@@H]([C@H](O)C)NCC)c4ccccc4                  | 4.638 | 4.644 | 4.438 | 4.269 | 4.882 | 70.437 |
| 734 <sup>35</sup> | C1CS(=O)(=O)N(C)C(c2n13)cc(cc2c(c3)CC)C(=O)N[C@@H]([C@H](O)C)NCC)c4ccccc4                  | 4.319 | 3.455 | 3.721 | 4.867 | 4.726 | 71.110 |
| 735 <sup>35</sup> | C1CS(=O)(=O)N(C)C(c2c13)cc(cc2n(c3)CC)C(=O)N[C@@H]([C@H](O)C)NC4CC4)c5ccccc5               | 5.046 | 4.531 | 4.778 | 4.222 | 5.907 | 75.456 |
| 736 <sup>35</sup> | C1CS(=O)(=O)N(C)C(c2n13)cc(cc2c(c3)CC)C(=O)N[C@@H](Cc4ccccc4)[C@H](O)CNCc5cccc(c5)C(F)(F)F | 5.699 | 5.326 | 5.225 | 5.359 | 5.119 | 72.742 |
| 737 <sup>35</sup> | C1CS(=O)(=O)O(c2n13)cc(cc2c(c3)CC)C(=O)N[C@@H](Cc4ccccc4)[C@H](O)CNCc5cccc(c5)C(F)(F)F     | 5.097 | 5.533 | 4.638 | 4.141 | 5.464 | 68.651 |
| 738 <sup>35</sup> | C1CS(=O)(=O)O(c2n13)cc(cc2c(c3)CC)C(=O)N[C@@H](Cc4ccccc4)[C@H](O)CNC5CCOCC5                | 4.066 | 3.936 | 3.976 | 3.620 | 4.570 | 77.455 |
| 739 <sup>35</sup> | C1CS(=O)(=O)O(c2n13)cc(cc2c(c3)CC)C(=O)N[C@@H]([C@H](O)C)NCC#C)c4ccccc4                    | 3.444 | 3.278 | 3.514 | 3.779 | 3.755 | 55.520 |
| 740 <sup>35</sup> | C1CS(=O)(=O)O(c2n13)cc(cc2c(c3)CC)C(=O)N[C@@H]([C@H](O)C)NCC4CC4)c5ccccc5                  | 3.602 | 3.302 | 3.668 | 3.588 | 3.911 | 52.380 |
| 741 <sup>35</sup> | C1CS(=O)(=O)N(C)C(c2c13)cc(cc2n(c3)CC)C(=O)N[C@@H]([C@H](O)C)NCCC)c4ccccc4                 | 5.097 | 5.031 | 4.386 | 4.248 | 5.979 | 52.201 |
| 742 <sup>35</sup> | C1CS(=O)(=O)N(C)C(c2n13)cc(cc2c(c3)CC)C(=O)N[C@@H]([C@H](O)C)NCCF)c4ccccc4                 | 4.301 | 3.938 | 4.164 | 5.089 | 4.940 | 57.920 |
| 743 <sup>35</sup> | C1CS(=O)(=O)N(C)C(c2c13)cc(cc2n(c3)CC)C(=O)N[C@@H]([C@H](O)C)NCCF)c4ccccc4                 | 4.398 | 3.694 | 3.927 | 4.469 | 4.729 | 64.153 |
| 744 <sup>35</sup> | C1CS(=O)(=O)N(C)C(c2c13)cc(cc2n(c3)CC)C(=O)N[C@@H]([C@H](O)C)NCC(F)Fc4ccccc4               | 4.699 | 4.115 | 4.565 | 4.539 | 4.826 | 58.682 |
|                   | C1CS(=O)(=O)N(C)C(c2c13)cc(cc2n(c3)CC)C(=O)N[C@@H]([C@H](O)C)NCC(F)Fc4ccccc4               | 4.495 | 4.222 | 4.071 | 4.334 | 4.571 | 56.647 |

|                   |                                                                                               |       |       |       |       |       |        |  |  |
|-------------------|-----------------------------------------------------------------------------------------------|-------|-------|-------|-------|-------|--------|--|--|
|                   | NCC(F)(F)C(F)(F)F)Ce4cccc4                                                                    |       |       |       |       |       |        |  |  |
| 746 <sup>35</sup> | C1CS(=O)(=O)N(C)c(c2c13)cc(cc2n(c3)CC)C(=O)N[C@H]([C@H](O)C<br>NCC(F)(F)F)Ce4cccc4            | 4.102 | 4.204 | 3.973 | 4.595 | 4.918 | 50.205 |  |  |
| 747 <sup>35</sup> | C1CS(=O)(=O)N(C)c(c2c13)cc(cc2n(c3)CC)C(=O)N[C@@H](Ce4cccc4<br>)C@H](O)CNc5cccc5              | 5.301 | 5.381 | 4.428 | 5.097 | 5.548 | 54.888 |  |  |
| 748 <sup>36</sup> | c12cccc(c1)C[C@@](C)(N)COCc3cc(cc(c3)N(S(=O)(=O)C)CCC)C(=O)<br>N[C@H](CC2)c4cccc4             | 4.770 | 4.557 | 4.831 | 4.327 | 5.529 | 48.057 |  |  |
| 749 <sup>36</sup> | c12cccc(c1)C[C@@](C)(N)C(=O)OCc3cc(cc(c3)N(S(=O)(=O)C)CCC)C(=O)<br>N[C@H](CC2)c4cccc4         | 5.699 | 4.893 | 4.840 | 4.578 | 5.294 | 34.132 |  |  |
| 750 <sup>36</sup> | c12cccc(c1)C[C@@](C)(N)COCc3cc(cc(c3)N(C)S(=O)(=O)C)C(=O)N[C<br>@H](CC2)c4cccc4               | 4.310 | 4.462 | 4.635 | 4.341 | 5.446 | 43.237 |  |  |
| 751 <sup>36</sup> | c12cccc(c1)C[C@@](C)(N)COCc3cc(C(=O)N[C@H](CC2)c4cccc4)cc(c<br>3)N(S(=O)(=O)C)c5cccc5         | 4.921 | 4.455 | 4.965 | 4.726 | 2.834 | 60.301 |  |  |
| 752 <sup>36</sup> | c12cccc(c1)C[C@@](C)(N)C(=O)OCc3cc(C(=O)N[C@H](CC2)c4cccc4<br>)cc(c3)N(S(=O)(=O)C)c5cccc5     | 6.000 | 5.904 | 5.285 | 5.458 | 5.826 | 56.447 |  |  |
| 753 <sup>36</sup> | c12cccc(c1)C[C@@](C)(N)COCc3cc(cc(c3)N(C)S(=O)(=O)CC)C(=O)N[<br>C@H](CC2)c4cccc4              | 4.252 | 4.806 | 4.537 | 4.453 | 4.562 | 61.063 |  |  |
| 754 <sup>36</sup> | c12cccc(c1)C[C@@](C)(N)COCc3cc(cc(c3)N(C)S(=O)(=O)C(C)C)C(=O)<br>N[C@H](CC2)c4cccc4           | 3.708 | 3.483 | 3.187 | 4.649 | 4.459 | 47.888 |  |  |
| 755 <sup>36</sup> | c12cccc(c1)C[C@@](C)(N)COCc3cc(cc(c3)N(S(=O)(=O)C)CCC)C(=O)<br>N[C@H](CC2)c4ccc(F)cc4         | 5.000 | 5.062 | 4.973 | 4.521 | 5.799 | 57.144 |  |  |
| 756 <sup>36</sup> | c12cccc(c1)C[C@@](C)(N)COCc3cc(C(=O)N[C@H](C)CC2)cc(c3)N(<br>S(=O)(=O)C)CCC                   | 3.538 | 3.706 | 2.858 | 3.482 | 4.707 | 54.646 |  |  |
| 757 <sup>36</sup> | c12cccc(c1)C[C@@](C)(N)COCc3cc(C(=O)N[C@H](CC2)CC)cc(c3)N(S<br>(=O)(=O)C)CCC                  | 4.071 | 3.059 | 3.963 | 3.610 | 4.248 | 54.646 |  |  |
| 758 <sup>36</sup> | c12cccc(c1)C[C@@](C)(N)COCc3cc(C(=O)N[C@H](CC2)C(C)C)cc(c3)<br>N(S(=O)(=O)C)CCC               | 3.757 | 3.844 | 3.890 | 3.805 | 4.755 | 54.646 |  |  |
| 759 <sup>36</sup> | c12cccc(c1)C[C@@](C)(N)COCc3cc(C(=O)N[C@H](CC2)C#C)cc(c3)N(<br>S(=O)(=O)C)CCC                 | 4.276 | 4.514 | 3.434 | 3.298 | 4.594 | 54.646 |  |  |
| 760 <sup>36</sup> | c12cccc(c1)C[C@@](C)(N)COCc3cc(C(=O)N[C@H](CC2)C4CC4)cc(c3)<br>N(S(=O)(=O)C)CCC               | 2.959 | 3.287 | 3.217 | 3.977 | 2.661 | 54.646 |  |  |
| 761 <sup>36</sup> | c12cccc(c1)C[C@@](C)(N)C(=O)OCc3cc(cc(c3)N(C)S(=O)(=O)CC(F)(F<br>)F)C(=O)N[C@H](CC2)c4cccc4   | 4.796 | 4.887 | 5.048 | 4.968 | 5.276 | 77.147 |  |  |
| 762 <sup>36</sup> | c12cccc(c1)C[C@@](C)(N)C(=O)OCc3cc(cc(c3)N(C)S(=O)(=O)C(F)(F)F<br>)C(=O)N[C@H](CC2)c4cccc4    | 4.420 | 3.862 | 4.456 | 4.635 | 5.121 | 76.838 |  |  |
| 763 <sup>36</sup> | c12cccc(c1)C[C@@](C)(N)C(=O)OCc3cc(cc(c3)N(C)S(=O)(=O)N(C)C)<br>C(=O)N[C@H](CC2)c4cccc4       | 5.398 | 5.478 | 4.875 | 5.137 | 5.531 | 79.855 |  |  |
| 764 <sup>36</sup> | c12cccc(c1)C[C@@](C)(N)C(=O)OCc3cc(cc(Br)c3)C(=O)N[C@H](CC2)<br>c4cccc4                       | 3.569 | 3.679 | 3.309 | 3.799 | 3.664 | 81.137 |  |  |
| 765 <sup>36</sup> | c12cccc(c1)C[C@@](C)(N)C(=O)OCc3cc(cc(c3)-<br>c4ncco4)C(=O)N[C@H](CC2)c5cccc5                 | 3.108 | 3.017 | 3.147 | 3.584 | 3.690 | 79.351 |  |  |
| 766 <sup>36</sup> | c12cccc(c1)C[C@@](C)(N)C(=O)OCc3cc(C(=O)N[C@H](CC2)c4cccc4<br>)cc(c3)-c5cccc5C#N              | 4.569 | 4.866 | 4.711 | 4.000 | 4.833 | 80.135 |  |  |
| 767 <sup>36</sup> | c12cc(F)cc(c1)C[C@@](C)(N)C(=O)OCc3cc(C(=O)N[C@H](CC2)c4ccc<br>(F)cc4)cc(c3)-c5cccc5C#N       | 3.886 | 3.696 | 3.763 | 4.148 | 3.776 | 67.303 |  |  |
| 768 <sup>36</sup> | c12c(F)ccc(c1)C[C@@](C)(N)C(=O)OCc3cc(C(=O)N[C@H](CC2)c4ccc<br>(F)cc4)cc(c3)-c5cccc5C#N       | 4.337 | 4.697 | 3.526 | 3.975 | 4.720 | 78.518 |  |  |
| 769 <sup>36</sup> | c12cccc(c1F)C[C@@](C)(N)C(=O)OCc3cc(C(=O)N[C@H](CC2)c4ccc(F<br>)cc4)cc(c3)-c5cccc5C#N         | 4.108 | 4.779 | 3.405 | 4.203 | 3.765 | 71.234 |  |  |
| 770 <sup>36</sup> | c12cccc(c1)C[C@@](C)(N)C(=O)OCc3cc(cc(c3)-<br>c4c(C#N)c(F)ccc4)C(=O)N[C@H](CC2)c5ccc(F)cc5    | 4.658 | 5.158 | 4.958 | 4.228 | 4.746 | 70.573 |  |  |
| 771 <sup>36</sup> | c12c(F)ccc(c1)C[C@@](C)(N)C(=O)OCc3cc(cc(c3)-<br>c4c(C#N)c(F)ccc4)C(=O)N[C@H](CC2)c5ccc(F)cc5 | 4.337 | 4.978 | 3.443 | 3.900 | 4.717 | 66.155 |  |  |
| 772 <sup>37</sup> | Fc1ccc(cc1)[C@@H](C)NC(=O)c2cc(cc(c2)N(C)S(=O)(=O)C)C(=O)OC[<br>C@@](N)(CO)Cc3cccc3           | 3.714 | 3.478 | 3.163 | 2.576 | 3.634 | 69.475 |  |  |
| 773 <sup>37</sup> | Fc1ccc(cc1)[C@@H](C)NC(=O)c2cc(cc(c2)N(C)S(=O)(=O)C)C(=O)NC[<br>C@@](N)(CO)Cc3cccc3           | 1.967 | 2.454 | 2.218 | 2.839 | 2.987 | 70.497 |  |  |
| 774 <sup>37</sup> | Fc1ccc(cc1)[C@@H](C)NC(=O)c2cc(cc(c2)N(C)S(=O)(=O)C)C(=O)OC[<br>C@@](O)(CN)Cc3cccc3           | 1.654 | 2.683 | 2.417 | 2.282 | 1.709 | 72.078 |  |  |
| 775 <sup>37</sup> | Fc1ccc(cc1)[C@@H](C)NC(=O)c2cc(cc(c2)N(C)S(=O)(=O)C)C(=O)NC[<br>C@@](O)(CO)Cc3cccc3           | 1.604 | 1.893 | 2.584 | 1.825 | 1.844 | 71.499 |  |  |
| 776 <sup>37</sup> | Fc1ccc(cc1)[C@@H](C)NC(=O)c2cc(cc(c2)N(C)S(=O)(=O)C)COC[C@<br>@](N)(CO)Cc3cccc3               | 2.863 | 2.436 | 3.030 | 2.691 | 2.967 | 75.533 |  |  |
| 777 <sup>37</sup> | Fc1ccc(cc1)[C@@H](C)NC(=O)c2cc(cc(c2)N(C)S(=O)(=O)C)CNC[C@<br>@](N)(CO)Cc3cccc3               | 1.996 | 2.544 | 2.108 | 1.889 | 2.884 | 75.214 |  |  |
|                   | Fc1ccc(cc1)[C@@H](C)NC(=O)c2cc(cc(c2)N(C)S(=O)(=O)C)CCC[C@                                    | 1.650 | 2.450 | 2.327 | 2.418 | 0.737 | 70.201 |  |  |

|                   |                                                                                                |       |       |       |       |       |        |
|-------------------|------------------------------------------------------------------------------------------------|-------|-------|-------|-------|-------|--------|
|                   | @](N)(CO)Ce3ceccc3                                                                             |       |       |       |       |       |        |
| 779 <sup>37</sup> | Fc1ccc(cc1)[C@@H](C)NC(=O)c2cc(cc(c2)N(C)S(=O)(=O)C)OCC[C@@](N)(CO)Ce3ceccc3                   | 1.152 | 1.750 | 1.180 | 1.730 | 1.887 | 78.682 |
| 780 <sup>37</sup> | Fc1ccc(cc1)[C@@H](C)NC(=O)c2cc(cc(c2)N(C)S(=O)(=O)C)COC[C@@H](N)Ce3ceccc3                      | 1.996 | 2.096 | 2.797 | 2.577 | 2.848 | 78.597 |
| 781 <sup>37</sup> | Fc1ccc(cc1)[C@@H](C)NC(=O)c2cc(cc(c2)N(C)S(=O)(=O)C)COC[C@@](C)(N)Ce3ceccc3                    | 3.463 | 3.879 | 3.704 | 2.692 | 3.872 | 78.612 |
| 782 <sup>37</sup> | Fc1ccc(cc1)[C@@H](C)NC(=O)c2cc(cc(c2)N(C)S(=O)(=O)C)COC[C@@](N)(CC)Ce3ceccc3                   | 1.658 | 1.348 | 2.473 | 2.686 | 1.937 | 79.038 |
| 783 <sup>37</sup> | Fc1ccc(cc1)[C@@H](C)NC(=O)c2cc(cc(c2)N(C)S(=O)(=O)C)COC[C@@](CF)(N)Ce3ceccc3                   | 3.001 | 3.107 | 2.745 | 2.796 | 3.385 | 78.515 |
| 784 <sup>37</sup> | Fc1ccc(cc1)[C@@H](C)NC(=O)c2cc(cc(c2)N(C)S(=O)(=O)C)COC[C@@](C(F)F)(N)Ce3ceccc3                | 3.034 | 2.515 | 2.954 | 3.281 | 3.466 | 78.393 |
| 785 <sup>37</sup> | Fc1ccc(cc1)[C@@H](C)NC(=O)c2cc(cc(c2)N(C)S(=O)(=O)C)COC(=O)[C@@](N)(CO)Ce3ceccc3               | 3.509 | 3.874 | 1.705 | 2.886 | 3.700 | 79.973 |
| 786 <sup>37</sup> | Fc1ccc(cc1)[C@@H](C)NC(=O)c2cc(cc(c2)N(C)S(=O)(=O)C)COC(=O)[C@@](C)(N)Ce3ceccc3                | 4.721 | 4.370 | 3.956 | 4.604 | 5.334 | 68.580 |
| 787 <sup>37</sup> | Fc1ccc(cc1)[C@@H](C)NC(=O)c2cc(cc(c2)N(C)S(=O)(=O)C)CNC(=O)[C@@](N)(CO)Ce3ceccc3               | 1.742 | 1.739 | 1.986 | 2.448 | 2.701 | 68.320 |
| 788 <sup>37</sup> | Fc1ccc(cc1)[C@@H](C)NC(=O)c2cc(cc(c2)N(C)S(=O)(=O)C)CNC(=O)[C@@](C)(N)Ce3ceccc3                | 2.243 | 3.017 | 2.512 | 2.254 | 1.467 | 63.226 |
| 789 <sup>37</sup> | Fc1ccc(cc1)[C@@H](C)NC(=O)c2cc(cc(c2)N(C)S(=O)(=O)C)-c3oc(nn3)[C@@](C)(N)Ce4ceccc4             | 4.921 | 4.373 | 3.931 | 4.415 | 4.883 | 65.107 |
| 790 <sup>37</sup> | Fc1ccc(cc1)[C@@H](C)NC(=O)c2cc(cc(c2)N(C)S(=O)(=O)C)-c3nc(no3)[C@@](C)(N)Ce4ceccc4             | 2.738 | 3.383 | 2.391 | 2.364 | 3.146 | 71.994 |
| 791 <sup>37</sup> | Fc1ccc(cc1)[C@@H](C)NC(=O)c2cc(cc(c2)N(C)S(=O)(=O)C)-c3nc(on3)[C@@](C)(N)Ce4ceccc4             | 2.686 | 2.815 | 2.815 | 3.272 | 3.328 | 69.227 |
| 792 <sup>37</sup> | Fc1ccc(cc1)[C@@H](C)NC(=O)c2cc(cc(c2)N(C)S(=O)(=O)C)-c3sc(nn3)[C@@](C)(N)Ce4ceccc4             | 1.524 | 1.296 | 1.854 | 1.708 | 1.766 | 65.596 |
| 793 <sup>37</sup> | Fc1ccc(cc1)[C@@H](C)NC(=O)c2cc(cc(c2)N(C)S(=O)(=O)C)-c3oc(cn3)[C@@](C)(N)Ce4ceccc4             | 5.155 | 4.946 | 5.829 | 4.682 | 5.596 | 66.354 |
| 794 <sup>37</sup> | Fc1ccc(cc1)[C@@H](C)NC(=O)c2cc(cc(c2)N(C)S(=O)(=O)C)-c3oc(cc3)[C@@](C)(N)Ce4ceccc4             | 4.699 | 4.385 | 3.959 | 3.776 | 4.801 | 78.881 |
| 795 <sup>37</sup> | Fc1ccc(cc1)[C@@H](C)NC(=O)c2cc(cc(c2)N(C)S(=O)(=O)C)-c3nc([nH]n3)[C@@](C)(N)Ce4ceccc4          | 3.085 | 2.686 | 2.801 | 3.116 | 4.487 | 81.541 |
| 796 <sup>37</sup> | Fc1ccc(cc1)[C@@H](C)NC(=O)c2cc(cc(c2)N(C)S(=O)(=O)C)-n3cc(nn3)[C@@](C)(N)Ce4ceccc4             | 1.788 | 1.389 | 1.908 | 2.160 | 1.565 | 52.754 |
| 797 <sup>38</sup> | CN1S(=O)(=O)CCN2CCN(CC)C([C@@H]2[C@@H]13)=CC(=C3)C(=O)N[C@@H](C)C4CCCC4[C@@H](O)CNC5CCCC5C(F)F | 4.585 | 4.567 | 4.791 | 5.219 | 4.403 | 35.316 |
| 798 <sup>38</sup> | CN1S(=O)(=O)CCC(c12)c(NCC)cc(c2)C(=O)N[C@@H](C)C3CCCC3[C@@H](O)CNC4CCCC4C(F)F                  | 4.721 | 3.797 | 4.116 | 4.841 | 4.252 | 72.258 |
| 799 <sup>38</sup> | C1CCCN(S1(=O)=O)c(cc(c2)NCC)cc2C(=O)N[C@@H](C)C3CCCC3[C@@H](O)CNC4CCOCC4                       | 4.041 | 4.229 | 3.358 | 3.937 | 5.048 | 69.168 |
| 800 <sup>38</sup> | CN1S(=O)(=O)CCC(c12)c(NCC)cc(c2)C(=O)N[C@@H](C)C3CCCC3[C@@H](O)CNC4CCOCC4                      | 3.721 | 3.640 | 3.622 | 4.319 | 3.367 | 73.488 |
| 801 <sup>38</sup> | CN1S(=O)(=O)CCC(c12)c(NCC)cc(c2)C(=O)N[C@@H](C)C3CCCC3C(F)F                                    | 4.585 | 3.533 | 4.091 | 4.218 | 5.405 | 70.111 |
| 802 <sup>38</sup> | C1CCCN(S1(=O)=O)c(cc(c2)NCC)cc2C(=O)N[C@@H](C)C3CCCC3C3)C4CCCC4                                | 3.921 | 3.229 | 3.369 | 3.906 | 3.365 | 77.996 |
| 803 <sup>38</sup> | c1cccc1[C@@H]([C@@H](O)CNC2CC2)NC(=O)C(=C3)C=C([C@@H]4[C@@H]35)N(CCC)CCN4CCS(=O)(=O)N5C        | 3.260 | 3.815 | 3.261 | 3.691 | 3.339 | 71.941 |
| 804 <sup>38</sup> | CN1S(=O)(=O)CCC(c12)c(NCC)cc(c2)C(=O)N[C@@H](C)C3CCCC3C3)C4CCCC4                               | 3.824 | 3.662 | 3.621 | 4.287 | 4.881 | 80.381 |
| 805 <sup>38</sup> | CN1S(=O)(=O)Cn2cc(CC)c(c2c13)cc(c3)C(=O)N[C@@H](C)C4CCCC4[C@@H](O)CNC5CCCC5OC                  | 5.097 | 4.544 | 4.222 | 5.215 | 5.345 | 69.879 |
| 806 <sup>38</sup> | CN1S(=O)(=O)CCn2cc(CC)c(c2c13)cc(c3)C(=O)N[C@@H](C)C4CCCC4[C@@H](O)CNC5CCCC5OC                 | 5.699 | 5.147 | 5.528 | 5.516 | 6.386 | 56.499 |
| 807 <sup>38</sup> | CN1S(=O)(=O)Cn2cc(CC)c(c2c13)cc(c3)C(=O)N[C@@H](C)C4CCCC4[C@@H](O)CNC(C)C(C)CCCC(C)C           | 4.638 | 4.088 | 4.128 | 4.631 | 5.645 | 65.346 |
| 808 <sup>38</sup> | CN1S(=O)(=O)CCn2cc(CC)c(c2c13)cc(c3)C(=O)N[C@@H](C)C4CCCC4[C@@H](O)CNC(C)C(C)CCCC(C)C          | 5.301 | 5.842 | 4.331 | 4.931 | 5.701 | 68.755 |
| 809 <sup>38</sup> | CN1S(=O)(=O)Cn2cc(CC)c(c2c13)cc(c3)C(=O)N[C@@H](C)C4CCCC4[C@@H](O)CNC5CCCC5                    | 4.222 | 4.147 | 3.343 | 4.603 | 4.379 | 69.114 |
| 810 <sup>38</sup> | CN1S(=O)(=O)CCn2cc(CC)c(c2c13)cc(c3)C(=O)N[C@@H](C)C4CCCC4[C@@H](O)CNC5CCCC5                   | 5.046 | 4.173 | 4.004 | 4.904 | 5.150 | 68.989 |
|                   | CN1S(=O)(=O)Cn2cc(CC)c(c2c13)cc(c3)C(=O)N[C@@H](C)C4CCCC4[C@@H](O)CNC                          | 4.041 | 3.254 | 3.506 | 4.560 | 2.757 | 62.390 |



|                   |                                                                                                                     |       |       |       |       |       |        |  |
|-------------------|---------------------------------------------------------------------------------------------------------------------|-------|-------|-------|-------|-------|--------|--|
|                   | )Ce4cccc4                                                                                                           |       |       |       |       |       |        |  |
| 812 <sup>38</sup> | CN1S(=O)(=O)CCn2cc(CC)c(c2c13)cc(c3)C(=O)N[C@H]([C@H](O)CN)C)Ce4cccc4                                               | 4.824 | 5.120 | 4.602 | 4.860 | 5.818 | 64.857 |  |
| 813 <sup>38</sup> | CN1S(=O)(=O)CCn2cc(CC)c(c2c13)cc(c3)C(=O)N[C@@H](Ce4cccc4)[C@H](O)CNCe5cccc(e5)OC                                   | 4.553 | 3.332 | 3.814 | 5.168 | 4.882 | 56.831 |  |
| 814 <sup>38</sup> | c1cccc1C[C@@H]([C@H](O)CNC2CC2)NC(=O)c(c3)cc(c4c35)c(CC)c n4CCCS(=O)(=O)N5C                                         | 3.310 | 2.981 | 3.224 | 3.471 | 3.879 | 65.444 |  |
| 815 <sup>38</sup> | N1S(=O)(=O)CCn2cc(CC)c(c2c13)cc(c3)C(=O)N[C@@H](Ce4cccc4)[C@H](O)CNCe5cccc(e5)OC                                    | 4.854 | 4.781 | 4.043 | 5.238 | 4.461 | 51.007 |  |
| 816 <sup>38</sup> | CCN1S(=O)(=O)CCn2cc(CC)c(c2c13)cc(c3)C(=O)N[C@@H](Ce4cccc4)[C@H](O)CNC5CCOCC5                                       | 5.301 | 4.717 | 5.971 | 4.855 | 5.553 | 67.561 |  |
| 817 <sup>38</sup> | CC(C)N1S(=O)(=O)CCn2cc(CC)c(c2c13)cc(c3)C(=O)N[C@@H](Ce4cccc4)[C@H](O)CNC5CCOCC5                                    | 4.638 | 4.477 | 5.069 | 4.871 | 4.546 | 71.877 |  |
| 818 <sup>38</sup> | FC(F)(F)CN1S(=O)(=O)CCn2cc(CC)c(c2c13)cc(c3)C(=O)N[C@@H](Ce4cccc4)[C@H](O)CNC5CCOCC5                                | 4.538 | 4.477 | 4.316 | 4.735 | 5.542 | 74.956 |  |
| 819 <sup>38</sup> | CCN1S(=O)(=O)CCn2cc(CC)c(c2c13)cc(c3)C(=O)N[C@@H](Ce4cccc4)[C@H](O)CNC5CCCC5                                        | 5.155 | 3.826 | 4.336 | 4.908 | 5.550 | 85.671 |  |
| 820 <sup>38</sup> | c1cccc1C[C@@H]([C@H](O)CNC2CC2)NC(=O)c(c3)cc(c4c35)c(CC)c n4CCS(=O)(=O)N5CC                                         | 4.699 | 4.010 | 4.426 | 4.824 | 5.485 | 45.492 |  |
| 821 <sup>39</sup> | c1cc(F)ccc1[C@@H](C)NC(=O)c2cc(cc(e2)N(C)S(=O)(=O)C)C(=O)N[C@@H](Ce3cccc3)CNCC(=O)NCC(C)C                           | 3.932 | 3.649 | 3.531 | 4.319 | 4.355 | 43.234 |  |
| 822 <sup>39</sup> | c1cc(F)ccc1[C@@H](C)NC(=O)c2cc(cc(e2)N(C)S(=O)(=O)C)C(=O)N[C@@H](Ce3cccc3)CN[C@@H](C)C(=O)NCC(C)C                   | 5.097 | 4.956 | 5.083 | 4.234 | 6.270 | 74.461 |  |
| 823 <sup>39</sup> | c1cc(F)ccc1[C@@H](C)NC(=O)c2cc(cc(e2)N(C)S(=O)(=O)C)C(=O)N[C@@H](Ce3cccc3)CN[C@@H](CC)C(=O)NCC(C)C                  | 5.155 | 4.359 | 4.523 | 4.475 | 6.176 | 70.893 |  |
| 824 <sup>39</sup> | c1cc(F)ccc1[C@@H](C)NC(=O)c2cc(cc(e2)N(C)S(=O)(=O)C)C(=O)N[C@@H](Ce3cccc3)CN[C@@H](CCC)C(=O)NCC(C)C                 | 5.398 | 5.165 | 5.416 | 4.571 | 5.023 | 69.907 |  |
| 825 <sup>39</sup> | c1cc(F)ccc1[C@@H](C)NC(=O)c2cc(cc(e2)N(C)S(=O)(=O)C)C(=O)N[C@@H](Ce3cccc3)CN[C@@H](CCO)C(=O)NCC(C)C                 | 4.886 | 4.557 | 4.434 | 4.470 | 4.648 | 66.396 |  |
| 826 <sup>39</sup> | c1cc(F)ccc1[C@@H](C)NC(=O)c2cc(cc(e2)N(C)S(=O)(=O)C)C(=O)N[C@@H](Ce3cccc3)CN[C@@H](CCS(=O)(=O)C)C(=O)NCC(C)C        | 4.886 | 5.006 | 4.912 | 4.519 | 4.806 | 76.879 |  |
| 827 <sup>39</sup> | c1cc(F)ccc1[C@@H](C)NC(=O)c2cc(cc(e2)N(C)S(=O)(=O)C)C(=O)N[C@@H](CN[C@@H](C)C(=O)NCC)Ce3cccc3                       | 4.284 | 4.398 | 3.738 | 4.087 | 4.225 | 81.124 |  |
| 828 <sup>39</sup> | c1cc(F)ccc1[C@@H](C)NC(=O)c2cc(cc(e2)N(C)S(=O)(=O)C)C(=O)N[C@@H](Ce3cccc3)CN[C@@H](C)C(=O)NC4CC4                    | 4.620 | 3.882 | 4.096 | 4.277 | 5.238 | 77.646 |  |
| 829 <sup>39</sup> | c1cc(F)ccc1[C@@H](C)NC(=O)c2cc(cc(e2)N(C)S(=O)(=O)C)C(=O)N[C@@H](Ce3cccc3)CN[C@@H](C)C(=O)NC4cccc4                  | 3.857 | 3.728 | 4.327 | 4.152 | 3.523 | 72.125 |  |
| 830 <sup>39</sup> | c1cc(F)ccc1[C@@H](C)NC(=O)c2cc(cc(e2)N(C)S(=O)(=O)C)C(=O)N[C@@H](Ce3cccc3)CN[C@@H](C)C(=O)[C@@H](C4)CN[C@@H]4C(=O)O | 1.764 | 2.555 | 2.447 | 1.958 | 1.410 | 87.237 |  |
| 831 <sup>40</sup> | c1cccc(S2)c1N(c(c23)cccc3)C(=O)/N=C(\Nc4nc(C)cc(n4)C)Nc5cccc(c5)[N+](=O)[O-]                                        | 1.544 | 2.553 | 2.599 | 1.570 | 1.492 | 76.979 |  |
| 832 <sup>40</sup> | c1cc(F)ccc1-c(c2C#N)cc(-c3cccc3)nc2SCC(=O)NC45C[C@H]6C[C@@H](C4)C[C@H](C6)C5                                        | 0.928 | 1.641 | 1.648 | 1.523 | 0.613 | 81.576 |  |
| 833 <sup>40</sup> | c1cc(F)ccc1-c2cc(-c3cccc3)c(C#N)c(n2)SCC(=O)Nc4sc(nn4)CC                                                            | 1.301 | 1.652 | 1.721 | 1.638 | 1.389 | 74.478 |  |
| 834 <sup>40</sup> | c1cccc(c12)ccc(c2)N(c3cccc3)C(=O)CSc4nc(-c5ccc(cc5)OC)cc(c4C#N)-c6ccc(Cl)cc6                                        | 1.301 | 1.235 | 2.030 | 2.097 | 0.774 | 60.773 |  |
| 835 <sup>40</sup> | c1cccc1CSc(nn2)nc(c2c(c34)cccc3)O[C@H](N4)c5c(C)nn(c5Cl)-c6cccc6                                                    | 1.000 | 1.009 | 1.480 | 1.960 | 0.585 | 36.121 |  |
| 836 <sup>40</sup> | c1cccc1NC(=O)/N=C(/NC(=O)Nc2cccc2)Nc(n3)nc(C)c(c34)cccc4                                                            | 2.523 | 2.907 | 2.267 | 2.159 | 2.235 | 48.078 |  |
| 837 <sup>40</sup> | c1cccc(c12)[nH]cc2C(=O)CSc3n(Ce4cccc4)c(nn3)Cc5c[nH]c(c56)cccc6                                                     | 1.000 | 1.634 | 0.931 | 1.733 | 1.236 | 57.720 |  |
| 838 <sup>40</sup> | c1cc(Br)ccc1S(=O)(=O)N(S(=O)(=O)c(c2)ccc2Br)c3nn(c3)Cc4cc(Cl)c(Cl)cc4                                               | 1.046 | 1.507 | 1.499 | 2.769 | 2.022 | 25.626 |  |
| 839 <sup>40</sup> | c1cccc1-c2nc(c(C#N)c(e2)-c3cccc3)SCC(=O)Nc4cccc(c4)[N+](=[O-])=O                                                    | 1.699 | 2.160 | 2.484 | 2.028 | 1.901 | 42.555 |  |
| 840 <sup>40</sup> | c1cccc1-c2esc(n2)NC(=O)CSc3n(C)c(nn3)CC(=O)Nc4cccc(C)cc4                                                            | 1.678 | 1.915 | 1.745 | 1.846 | 1.736 | 60.550 |  |
| 841 <sup>40</sup> | C1CCCCN1c2nc(nc(n2)N3CCCC3)Nc(cc4)cc(c45)sc(n5)SCC(=O)NCCc6cc(OC)c(cc6)OC                                           | 2.553 | 3.019 | 2.655 | 2.537 | 2.480 | 53.488 |  |
| 842 <sup>40</sup> | C1CCCCN1c2nc(N3CCCC3)nc(n2)Nc(cc4)cc(c45)sc(n5)SCC(=O)Nc6cccc6F                                                     | 1.991 | 2.043 | 2.061 | 2.145 | 2.324 | 49.912 |  |
| 843 <sup>40</sup> | c1cccc1-c2cc(-c3cccc3)nc(n2)SCC(=O)OCC(=O)Nc(s4)c(C#N)c(c45)CCCC5                                                   | 1.462 | 2.337 | 1.708 | 1.791 | 1.367 | 54.979 |  |
| 844 <sup>40</sup> | C1CCCCc(c12)sc(c2C#N)NC(=O)C(F)(F)C(F)(F)C(F)(F)C(=O)Nc(s3)c(C#N)c(c34)CCCCC4                                       | 1.914 | 2.059 | 1.894 | 1.992 | 1.808 | 48.888 |  |
| 845 <sup>41</sup> | CC(C)[C@H](O)C(=O)N[C@@H](C)C(=O)N[C@@H](Ce1cccc1)[C@@H](O)C[C@@H](C)C(=O)N[C@@H](C)C(=O)Nc2cccc2                   | 3.886 | 3.500 | 3.975 | 3.626 | 4.366 | 44.334 |  |
|                   | CC(C)[C@H](O)C(=O)N[C@@H](CCSC)C(=O)N[C@@H](Ce1cccc1)[                                                              | 2.456 | 2.820 | 2.004 | 2.886 | 2.260 | 22.740 |  |



|                   |                                                                                                                             |       |       |       |       |       |        |  |
|-------------------|-----------------------------------------------------------------------------------------------------------------------------|-------|-------|-------|-------|-------|--------|--|
|                   | (CC(C)C)[C@@H](O)CC(=O)N[C@@H](CC(C)C)C(=O)NCc1cc(C(=O)O)ccc1                                                               |       |       |       |       |       |        |  |
| 873 <sup>42</sup> | O=C(C)N[C@@H]([C@H](C)CC)C(=O)N[C@@H](C)C(=O)N[C@@H](CC(C)C)[C@@H](O)CC(=O)N[C@@H](Cc1ccccc1)C(=O)NCc2cc(C(=O)O)ccc2        | 3.602 | 4.208 | 4.423 | 2.799 | 3.472 | 68.348 |  |
| 874 <sup>42</sup> | O=C(C)N[C@@H]([C@H](C)CC)C(=O)N[C@@H](C)C(=O)N[C@@H](CC(C)C)[C@@H](O)CC(=O)N[C@@H](Cc1ccc(O)cc1)C(=O)NCc2cc(C(=O)O)ccc2     | 3.959 | 3.881 | 3.289 | 3.808 | 3.615 | 75.454 |  |
| 875 <sup>43</sup> | CNC(=O)c1cc(N(C)S(=O)(=O)C)cc(c1)C(=O)N[C@@H]([C@H](O)CNC2CC2)Cc3ccccc3                                                     | 3.009 | 2.461 | 3.038 | 3.749 | 3.316 | 73.557 |  |
| 876 <sup>43</sup> | CCC(=O)c1cc(N(C)S(=O)(=O)C)cc(c1)C(=O)N[C@@H]([C@H](O)CNC2CC2)Cc3ccccc3                                                     | 2.824 | 3.597 | 2.589 | 3.532 | 3.047 | 66.999 |  |
| 877 <sup>43</sup> | c1ccccc1CC(=O)c2cc(N(C)S(=O)(=O)C)cc(c2)C(=O)N[C@@H]([C@H](O)CNC3CC3)Cc4ccccc4                                              | 2.854 | 2.759 | 2.097 | 3.523 | 2.295 | 70.220 |  |
| 878 <sup>43</sup> | c1ccccc1C[C@@H](O)c2cc(N(C)S(=O)(=O)C)cc(c2)C(=O)N[C@@H]([C@H](O)CNC3CC3)Cc4ccccc4                                          | 2.260 | 2.532 | 3.082 | 2.907 | 2.355 | 55.352 |  |
| 879 <sup>43</sup> | c1ccccc1C(=O)c2cc(N(C)S(=O)(=O)C)cc(c2)C(=O)N[C@@H]([C@H](O)CNC3CC3)Cc4ccccc4                                               | 4.009 | 4.005 | 4.182 | 3.496 | 4.910 | 37.054 |  |
| 880 <sup>43</sup> | c1ccccc1[C@@H](O)c2cc(N(C)S(=O)(=O)C)cc(c2)C(=O)N[C@@H]([C@H](O)CNC3CC3)Cc4ccccc4                                           | 2.229 | 4.966 | 2.688 | 2.457 | 2.856 | 8.475  |  |
| 881 <sup>43</sup> | c1ccccc1C(=C)c2cc(N(C)S(=O)(=O)C)cc(c2)C(=O)N[C@@H]([C@H](O)CNC3CC3)Cc4ccccc4                                               | 2.886 | 2.987 | 3.444 | 3.511 | 2.937 | 21.469 |  |
| 882 <sup>43</sup> | c1ccccc1Cc2cc(N(C)S(=O)(=O)C)cc(c2)C(=O)N[C@@H]([C@H](O)CNC3CC3)Cc4ccccc4                                                   | 2.334 | 3.219 | 2.740 | 2.835 | 2.095 | 48.316 |  |
| 883 <sup>43</sup> | C1CCCCC1C(=O)c2cc(N(C)S(=O)(=O)C)cc(c2)C(=O)N[C@@H]([C@H](O)CNC3CC3)Cc4ccccc4                                               | 3.347 | 3.757 | 3.728 | 3.536 | 3.373 | 24.599 |  |
| 884 <sup>43</sup> | CC(C)C(=O)c1cc(N(C)S(=O)(=O)C)cc(c1)C(=O)N[C@@H]([C@H](O)CNC2CC2)Cc3ccccc3                                                  | 3.620 | 4.005 | 3.708 | 3.608 | 3.348 | 46.033 |  |
| 885 <sup>43</sup> | C1CCCCC1C(=O)c2cc(N(C)S(=O)(=O)C)cc(c2)C(=O)N[C@@H]([C@H](O)CNC3CC3)Cc4ccccc4                                               | 3.745 | 3.901 | 3.545 | 3.440 | 4.050 | 26.626 |  |
| 886 <sup>43</sup> | C1CC1C=Cc2cc(N(C)S(=O)(=O)C)cc(c2)C(=O)N[C@@H]([C@H](O)CNC3CC3)Cc4ccccc4                                                    | 3.137 | 3.834 | 3.563 | 3.442 | 6.293 | 37.936 |  |
| 887 <sup>43</sup> | C1CC1C=Cc2cc(N(C)S(=O)(=O)C)cc(c2)C(=O)N[C@@H]([C@H](O)CNC3CC3)Cc4ccccc4                                                    | 4.456 | 4.414 | 3.863 | 3.442 | 4.253 | 58.042 |  |
| 888 <sup>43</sup> | C1CC1CCc2cc(N(C)S(=O)(=O)C)cc(c2)C(=O)N[C@@H]([C@H](O)CNC3CC3)Cc4ccccc4                                                     | 3.377 | 3.939 | 3.375 | 3.594 | 3.597 | 43.960 |  |
| 889 <sup>44</sup> | CC(C)C)OC(=O)N[C@@H](C(C)C)C(=O)N[C@@H](CCSC)C(=O)N[C@@H](Cc1ccccc1)[C@@H](O)C[C@@H](C)C(=O)N[C@@H](C(C)C)C(=O)NCc2ccccc2   | 4.155 | 4.354 | 4.596 | 4.523 | 4.721 | 45.848 |  |
| 890 <sup>44</sup> | CC(C)C)OC(=O)N[C@@H](C(C)C)C(=O)N[C@@H](C)C(=O)N[C@@H](Cc1ccccc1)[C@@H](O)C[C@@H](C)C(=O)N[C@@H](C(C)C)C(=O)NCc2ccccc2      | 4.086 | 4.704 | 4.221 | 3.976 | 4.342 | 34.268 |  |
| 891 <sup>44</sup> | CC(C)C)OC(=O)N[C@@H](CCC)C(=O)N[C@@H](CCSC)C(=O)N[C@@H](Cc1ccccc1)[C@@H](O)C[C@@H](C)C(=O)N[C@@H](C(C)C)C(=O)NCc2ccccc2     | 4.222 | 4.533 | 4.435 | 4.278 | 4.370 | 56.217 |  |
| 892 <sup>44</sup> | CC(C)C)OC(=O)N[C@@H](CCC)C(=O)N[C@@H](C)C(=O)N[C@@H](Cc1ccccc1)[C@@H](O)C[C@@H](C)C(=O)N[C@@H](C(C)C)C(=O)NCc2ccccc2        | 4.387 | 4.684 | 4.415 | 3.702 | 4.278 | 71.300 |  |
| 893 <sup>44</sup> | CC(C)C)OC(=O)N[C@@H](CC)C(=O)N[C@@H](C)C(=O)N[C@@H](Cc1ccccc1)[C@@H](O)C[C@@H](C)C(=O)N[C@@H](C(C)C)C(=O)NCc2ccccc2         | 4.125 | 3.869 | 4.161 | 3.568 | 4.307 | 64.914 |  |
| 894 <sup>44</sup> | CC(C)C)OC(=O)N[C@@H](CC(C)C)C(=O)N[C@@H](C)C(=O)N[C@@H](Cc1ccccc1)[C@@H](O)C[C@@H](C)C(=O)N[C@@H](C(C)C)C(=O)NCc2ccccc2     | 4.201 | 5.255 | 4.750 | 3.791 | 3.589 | 61.112 |  |
| 895 <sup>44</sup> | CC(C)C)OC(=O)N[C@@H]([C@H](C)CC)C(=O)N[C@@H](C)C(=O)N[C@@H](Cc1ccccc1)[C@@H](O)C[C@@H](C)C(=O)N[C@@H](C(C)C)C(=O)NCc2ccccc2 | 4.377 | 4.393 | 4.523 | 4.009 | 4.279 | 61.170 |  |
| 896 <sup>44</sup> | CC(C)C)OC(=O)N[C@@H](CN(C)C)C(=O)N[C@@H](C)C(=O)N[C@@H](Cc1ccccc1)[C@@H](O)C[C@@H](C)C(=O)N[C@@H](C(C)C)C(=O)NCc2ccccc2     | 2.597 | 2.706 | 3.521 | 2.978 | 4.503 | 58.922 |  |
| 897 <sup>44</sup> | CC(C)C)OC(=O)N[C@@H](CCN(C)C)C(=O)N[C@@H](C)C(=O)N[C@@H](Cc1ccccc1)[C@@H](O)C[C@@H](C)C(=O)N[C@@H](C(C)C)C(=O)NCc2ccccc2    | 1.051 | 1.553 | 1.866 | 1.839 | 1.326 | 63.986 |  |
| 898 <sup>44</sup> | CC(C)C)OC(=O)N[C@@H](COC)C(=O)N[C@@H](C)C(=O)N[C@@H](Cc1ccccc1)[C@@H](O)C[C@@H](C)C(=O)N[C@@H](C(C)C)C(=O)NCc2ccccc2        | 3.928 | 4.031 | 4.925 | 3.494 | 4.295 | 67.633 |  |
|                   | CC(C)C)OC(=O)N[C@@H](CCOC)C(=O)N[C@@H](C)C(=O)N[C@@H](Cc1ccccc1)[C@@H](O)C[C@@H](C)C(=O)N[C@@H](C(C)C)C(=O)NCc2ccccc2       |       |       |       |       |       |        |  |

|                   |                                                                                                                        |       |       |       |       |        |        |  |  |
|-------------------|------------------------------------------------------------------------------------------------------------------------|-------|-------|-------|-------|--------|--------|--|--|
|                   | H][Cc1cccc1][C@@H](O)C[C@@H](C)C(=O)N[C@@H](C(C)C)C(=O)Nc2cnc2                                                         |       |       |       |       |        |        |  |  |
| 900 <sup>44</sup> | CC(C)(C)OC(=O)N[C@@H](CC(F)F)C(=O)N[C@@H](C)C(=O)N[C@@H](Cc1cccc1)[C@@H](O)C[C@@H](C)C(=O)N[C@@H](C(C)C)C(=O)Nc2cnc2   | 4.347 | 3.947 | 4.308 | 3.695 | 4.386  | 62.285 |  |  |
| 901 <sup>44</sup> | CC(C)(C)OC(=O)N[C@@H](CC(F)F)C(=O)N[C@@H](C)C(=O)N[C@@H](Cc1cccc1)[C@@H](O)C[C@@H](C)C(=O)N[C@@H](C(C)C)C(=O)Nc2cnc2   | 3.551 | 4.536 | 4.439 | 3.685 | 3.305  | 69.207 |  |  |
| 902 <sup>44</sup> | CC(C)(C)OC(=O)N[C@@H](CCCC(F)F)C(=O)N[C@@H](C)C(=O)N[C@@H](Cc1cccc1)[C@@H](O)C[C@@H](C)C(=O)N[C@@H](C(C)C)C(=O)Nc2cnc2 | 3.378 | 3.932 | 4.112 | 3.691 | 3.401  | 64.541 |  |  |
| 903 <sup>45</sup> | CC(=O)N[C@@H](CC(C)C)C(=O)N[C@@H](C)C(=O)N[C@@H](O)CC(=O)N[C@@H](Cc1cccc1)[C@@H](O)CC(=O)N[C@@H](C(C)C)C(=O)Nc2cnc2    | 4.678 | 4.648 | 4.396 | 3.820 | 5.627  | 67.418 |  |  |
| 904 <sup>45</sup> | c1cccc1C[C@H](NC(=O)[C@@H](NC(=O)C)CC(C)C)[C@@H](O)CC(=O)N[C@@H](C)C(=O)N[C@@H](C)C(=O)N[C@@H](C)C(=O)Nc2cnc2          | 3.187 | 3.233 | 3.773 | 3.876 | 3.674  | 65.280 |  |  |
| 905 <sup>45</sup> | CC(=O)N[C@@H](CC(C)C)C(=O)N[C@@H](C)C(=O)N[C@@H](O)CC(=O)N[C@@H](CCSC)[C@@H](O)CC(=O)N[C@@H](C(C)C)C(=O)Nc2cnc2        | 3.337 | 3.477 | 3.652 | 3.432 | 3.737  | 65.139 |  |  |
| 906 <sup>45</sup> | c1cccc1C[C@H](NC(=O)[C@@H](NC(=O)C)CC(C)C)[C@@H](O)CC(=O)N[C@@H](CC2CCCC2)[C@@H](O)CC(=O)N[C@@H](C(C)C)C(=O)Nc2cnc2    | 4.301 | 3.804 | 4.582 | 3.987 | 5.013  | 67.985 |  |  |
| 907 <sup>45</sup> | CC(=O)N[C@@H](CC(C)C)C(=O)N[C@@H](C)C(=O)N[C@@H](O)CC(=O)N[C@@H](C)C(=O)N[C@@H](C)C(=O)Nc2cnc2                         | 1.469 | 1.644 | 1.774 | 2.390 | 1.693  | 64.805 |  |  |
| 908 <sup>46</sup> | c1cccc1-c2sec(c2CC(=O)N=C(N)N)-c3cccc3                                                                                 | 2.081 | 2.015 | 2.526 | 2.908 | 2.290  | 63.067 |  |  |
| 909 <sup>46</sup> | NC(N)=NC(=O)Cc1c(-c2c(Cl)cccc2)csc1-c3ccc(cc3)Oe4ccc(cc4)C(=O)C                                                        | 3.125 | 3.327 | 3.358 | 2.839 | 3.465  | 70.790 |  |  |
| 910 <sup>46</sup> | NC(N)=NC(=O)Cc1c(-c2c(Cl)cccc2)csc1-c3ccc(cc3)OCCe4cn[nH]e4                                                            | 2.161 | 2.775 | 2.676 | 3.128 | 2.312  | 63.110 |  |  |
| 911 <sup>46</sup> | CCCOc(c1)ccc1-c2sec(c2CC(=O)N=C(N)N)-c3cccc3                                                                           | 3.167 | 3.141 | 2.749 | 3.176 | 3.152  | 62.137 |  |  |
| 912 <sup>46</sup> | c1cccc1-c2sec(c2CC(=O)N=C(N)N)-c3ccc(cc3)OCCC                                                                          | 2.724 | 3.220 | 2.641 | 3.117 | 2.419  | 61.247 |  |  |
| 913 <sup>46</sup> | CCCOc(c1)ccc1-c2sec(c2CC(=O)N=C(N)N)-c3c(Cl)cccc3                                                                      | 3.201 | 3.257 | 2.867 | 3.177 | -1.736 | 48.240 |  |  |
| 914 <sup>46</sup> | Clc1cccc1-c2sec(c2CC(=O)N=C(N)N)-c3ccc(cc3)OCCC                                                                        | 3.229 | 3.139 | 2.366 | 3.264 | 3.394  | 47.638 |  |  |
| 915 <sup>46</sup> | CCCOc(c1)ccc1-c2sec(-c3c(Cl)cccc3)e2CC(=O)N=C(N)NCCCO                                                                  | 3.824 | 3.651 | 3.430 | 3.388 | 3.680  | 61.468 |  |  |
| 916 <sup>46</sup> | CCCOc(c1)ccc1-c2sec(-c3c(Cl)cccc3)e2CC(=O)N=C(N)NCCCO                                                                  | 3.268 | 3.605 | 3.080 | 3.410 | 3.965  | 65.561 |  |  |
| 917 <sup>46</sup> | CCCOc(c1)ccc1-c2sec(-c3c(Cl)cccc3)e2CC(=O)N=C(N)NCCCO                                                                  | 2.810 | 2.626 | 2.871 | 3.466 | 2.678  | 63.267 |  |  |
| 918 <sup>46</sup> | FC(F)CNC(=O)c(c1)ccc1-c2sec(-c3c(Cl)cccc3)e2CC(=O)N=C(N)NCCCO                                                          | 3.699 | 3.734 | 3.267 | 3.151 | 4.329  | 53.535 |  |  |
| 919 <sup>46</sup> | CCNC(=O)c(c1)ccc1-c2sec(-c3c(Cl)cccc3)e2CC(=O)N=C(N)NCCCO                                                              | 3.585 | 3.285 | 3.079 | 3.312 | 3.641  | 54.806 |  |  |
| 920 <sup>46</sup> | C1CC1CNC(=O)c(c2)ccc2-c3sec(-c4c(Cl)cccc4)e3CC(=O)N=C(N)NCCCO                                                          | 3.854 | 3.847 | 3.561 | 3.447 | 3.633  | 59.318 |  |  |
| 921 <sup>46</sup> | CCCCNC(=O)c(c1)ccc1-c2sec(-c3c(Cl)cccc3)e2CC(=O)N=C(N)NCCCO                                                            | 3.553 | 3.361 | 4.380 | 3.342 | 3.687  | 57.697 |  |  |
| 922 <sup>46</sup> | CCC(CC)NC(=O)c(c1)ccc1-c2sec(-c3c(Cl)cccc3)e2CC(=O)N=C(N)NCCCO                                                         | 3.032 | 3.885 | 3.262 | 3.570 | 3.712  | 57.597 |  |  |
| 923 <sup>47</sup> | CC(C)C[C@@]1(C)NC(=N/[H])N(C1=O)Cc2ccc(cc2)CCNC(=O)Nc3ccc(C#N)cc3                                                      | 2.155 | 2.446 | 2.170 | 1.776 | 2.312  | 61.380 |  |  |
| 924 <sup>47</sup> | CCCCNC(=O)NCCc(c1)ccc1CN(C2=O)/C(=N/[H])N[C@@]2(CC)CC3CCC3                                                             | 2.301 | 2.543 | 3.298 | 2.277 | 2.030  | 58.354 |  |  |
| 925 <sup>47</sup> | CCCCNC(=O)NCCc(c1)ccc1CN(C2=O)/C(=N/[H])N[C@@]2(CC3CCCC3)CC4CCCC4                                                      | 2.678 | 3.449 | 3.089 | 2.918 | 2.650  | 62.763 |  |  |
| 926 <sup>47</sup> | CCCCNC(=O)NCCc(c1)ccc1CN(C2=O)/C(=N/[H])N[C@@]2(CC(C)C)CC3CCCC3                                                        | 1.301 | 1.485 | 1.793 | 2.249 | 1.216  | 64.752 |  |  |
| 927 <sup>47</sup> | CCCCNC(=O)NCCc(c1)ccc1CN(C2=O)/C(=N/[H])N[C@@]2(CC(C)C)CC3CCCC3                                                        | 2.523 | 2.715 | 2.489 | 2.476 | 1.915  | 64.269 |  |  |
| 928 <sup>47</sup> | CCCCNC(=O)NCCc(c1)ccc1CN(C2=O)/C(=N/[H])N[C@@]2(CC3CCC3)CC4CCCC4                                                       | 3.456 | 3.962 | 4.212 | 3.041 | 3.483  | 64.055 |  |  |
| 929 <sup>47</sup> | CCC[C@H](C1)NC(=O)N1CCc(cc2)ccc2CN(C3=O)/C(=N/[H])N[C@@]3(CC4CCCC4)CC5CCCC5                                            | 4.569 | 4.034 | 4.934 | 3.792 | 4.810  | 59.574 |  |  |
| 930 <sup>48</sup> | c1cccc1C2(c3cccc3)N=C(N)N(C2=4)CCCN4                                                                                   | 1.420 | 1.747 | 1.680 | 1.113 | 1.760  | 61.800 |  |  |
| 931 <sup>48</sup> | FC(F)Fc1cccc(c1)[C@@]2(c3cccc3)N=C(N)N(C2=4)CCCN4                                                                      | 1.660 | 1.630 | 1.627 | 1.681 | 1.117  | 62.862 |  |  |
| 932 <sup>48</sup> | COc1cccc(c1)[C@@]2(c3cccc3)N=C(N)N(C2=4)CCCN4                                                                          | 1.693 | 2.342 | 1.889 | 2.007 | 1.945  | 61.247 |  |  |
| 933 <sup>48</sup> | CC(C)(C)c1cccc(c1)[C@@]2(c3cccc3)N=C(N)N(C2=4)CCCN4                                                                    | 1.520 | 2.541 | 3.061 | 1.734 | 1.931  | 39.555 |  |  |
| 934 <sup>48</sup> | c1cccc1Cc2ccc(c2)[C@@]3(c4cccc4)N=C(N)N(C3=5)CCCN5                                                                     | 2.276 | 2.625 | 1.922 | 2.381 | 2.670  | 52.077 |  |  |
| 935 <sup>48</sup> | c1cc(OC)ccc1Cc2ccc(c2)[C@@]3(c4cccc4)N=C(N)N(C3=5)CCCN5                                                                | 2.149 | 2.609 | 2.264 | 2.495 | 1.919  | 11.030 |  |  |

|                   |                                                                                                                          |       |       |       |       |       |        |
|-------------------|--------------------------------------------------------------------------------------------------------------------------|-------|-------|-------|-------|-------|--------|
| 936 <sup>48</sup> | c1cc(F)ccc1Cc2cccc(e2)[C@@]3(c4cccc4)N=C(N)N(C3=5)CCCN5                                                                  | 2.086 | 2.626 | 1.922 | 2.365 | 2.352 | 30.217 |
| 937 <sup>48</sup> | FC(F)(F)Oc(cc1)ccc1[C@@]2(c3cccc3Br)N=C(N)N(C2=4)CCCN4                                                                   | 2.585 | 2.565 | 3.097 | 3.108 | 2.847 | 3.242  |
| 938 <sup>48</sup> | CCCc1cccc(c1)[C@@]2(c3cccc3)OC(F)(F)F)N=C(N)N(C2=4)CCCN4                                                                 | 2.845 | 3.450 | 3.348 | 2.974 | 3.250 | 14.837 |
| 939 <sup>48</sup> | C1CC1CCc2cccc(e2)[C@@]3(c4ccc(cc4)OC(F)(F)F)N=C(N)N(C3=5)CCCN5                                                           | 3.678 | 4.351 | 3.940 | 3.024 | 3.307 | 33.698 |
| 940 <sup>48</sup> | c1ncnc1-c2cccc(e2)[C@@]3(c4ccc(cc4)OC)N=C(N)N(C3=5)CCCN5                                                                 | 4.000 | 3.823 | 3.891 | 3.551 | 3.726 | 58.351 |
| 941 <sup>48</sup> | c1ncnc1-c2cccc(e2)[C@@]3(c4ccc(cc4)OC(F)(F)F)N=C(N)N(C3=5)CCCN5                                                          | 4.000 | 3.664 | 3.902 | 3.815 | 3.870 | 67.723 |
| 942 <sup>48</sup> | Fc1ncnc1-c2cccc(e2)[C@@]3(c4ccc(cc4)OC)N=C(N)N(C3=5)CCCN5                                                                | 4.155 | 4.607 | 3.855 | 3.658 | 3.803 | 53.640 |
| 943 <sup>48</sup> | Fc1ncnc1-c2cccc(e2)[C@@]3(c4ccc(cc4)OC(F)(F)F)N=C(N)N(C3=5)CCCN5                                                         | 4.222 | 4.153 | 3.987 | 3.922 | 4.389 | 54.254 |
| 944 <sup>48</sup> | Fc1ncnc1-c2cccc(e2)[C@@]3(c(c4)ccc(c45)OCO5)N=C(N)N(C3=6)CCCN6                                                           | 3.796 | 3.631 | 3.455 | 3.959 | 3.474 | 57.740 |
| 945 <sup>48</sup> | Fc1ncnc1-c2cccc(e2)[C@@]3(N=C(N)N(C3=4)CCCN4)c(c5)ccc(c56)OCCO6                                                          | 3.721 | 3.501 | 3.543 | 3.829 | 3.473 | 59.489 |
| 946 <sup>48</sup> | Fc1ncnc1-c2cccc(e2)[C@@]3(c(c4)ccc(c45)OC(O5)(F)F)N=C(N)N(C3=6)CCCN6                                                     | 3.131 | 3.625 | 3.551 | 4.107 | 3.465 | 64.656 |
| 947 <sup>48</sup> | Fc1ncnc1-c2cccc(e2)[C@@]3(N=C(N)N(C3=4)CCCN4)c5cc(OCC)c(cc5)OCC                                                          | 4.097 | 3.475 | 3.727 | 4.028 | 3.574 | 69.300 |
| 948 <sup>48</sup> | Fc1ncnc1-c2cccc(e2)[C@@]3(N=C(N)N(C3=4)CCCN4)c5ccc(cc5)OC(F)(F)F                                                         | 4.097 | 4.326 | 3.933 | 4.566 | 4.157 | 66.249 |
| 949 <sup>48</sup> | Fc1ncnc1-c2cccc(e2)[C@@]3(c4ccc(cc4)OC(F)(F)F)N=C(N)N(C3=5)CCCN5                                                         | 4.097 | 3.858 | 3.850 | 3.861 | 4.526 | 63.373 |
| 950 <sup>48</sup> | Fc1ncnc1-c2cccc(e2)[C@@]3(c4ccc(cc4)OC(F)(F)F)N=C(N)N(C3=5)CCCN5                                                         | 3.886 | 3.652 | 3.930 | 3.927 | 4.298 | 69.478 |
| 951 <sup>48</sup> | Fc1ncnc1-c2cccc(e2)[C@@]3(c4ccc(cc4)OC(F)(F)F)N=C(N)N(C3=5)CC(N5)(C)C                                                    | 3.721 | 4.164 | 4.085 | 3.335 | 3.764 | 74.102 |
| 952 <sup>49</sup> | CC(=O)N[C@@H](CC(C)C)C(=O)N[C@@H](CCSC)C(=O)N[C@@H](CC(C)C)[C@@H](O)[C@@H]1[C@@H](CC(=O)C1)C(=O)N[C@@H](C)C(=O)O         | 3.143 | 2.843 | 2.804 | 3.894 | 4.483 | 67.657 |
| 953 <sup>49</sup> | CC(=O)N[C@@H](CC(C)C)C(=O)N[C@@H](CCSC)C(=O)N[C@@H](CC(C)C)[C@@H](O)[C@@H]1[C@@H](CCC1)C(=O)N[C@@H](C)C(=O)O             | 3.222 | 3.623 | 4.182 | 4.107 | 3.630 | 68.630 |
| 954 <sup>49</sup> | CC(=O)N[C@@H](CC(C)C)C(=O)N[C@@H](CCSC)C(=O)N[C@@H](CC(C)C)[C@@H](O)[C@@H]1[C@@H](CC(=O)C1)C(=O)N[C@@H](C)C(=O)NCCCC     | 5.000 | 5.224 | 4.992 | 4.623 | 6.003 | 69.864 |
| 955 <sup>49</sup> | CC(=O)N[C@@H](CC(C)C)C(=O)N[C@@H](CCSC)C(=O)N[C@@H](CC(C)C)[C@@H](O)[C@@H]1[C@@H](CCC1)C(=O)N[C@@H](C)C(=O)NCCCC         | 4.602 | 4.867 | 4.516 | 4.629 | 4.487 | 65.333 |
| 956 <sup>49</sup> | CC(=O)N[C@@H](CC(C)C)C(=O)N[C@@H](CCSC)C(=O)N[C@@H](CC(C)C)[C@@H](O)[C@@H]1[C@@H](CN(C1)C)C(=O)N[C@@H](C)C(=O)NCCCC      | 2.463 | 3.020 | 2.636 | 2.664 | 2.746 | 69.862 |
| 957 <sup>49</sup> | CC(=O)N[C@@H](CC(C)C)C(=O)N[C@@H](CCSC)C(=O)N[C@@H](CC(C)C)[C@@H](O)[C@@H]1[C@@H](C(=O)N(C1)CC)C(=O)N[C@@H](C)C(=O)NCCCC | 2.475 | 3.271 | 2.958 | 2.212 | 2.668 | 68.605 |
| 958 <sup>49</sup> | CC(=O)N[C@@H](CC(C)C)C(=O)N[C@@H](CCSC)C(=O)N[C@@H](CC(C)C)[C@@H](O)[C@@H]1[C@@H](OCC1)C(=O)N[C@@H](C)C(=O)NCCCC         | 2.020 | 2.480 | 2.489 | 2.901 | 2.298 | 65.653 |
| 959 <sup>50</sup> | CCCN(CCC)C(=O)c1ccc(cc1)C(=O)N[C@@H](Cc2cc(F)cc(F)e2)[C@@H](O)CN[C@@H](C)C(=O)NCCC(C)C                                   | 3.886 | 3.536 | 3.329 | 4.211 | 3.735 | 66.812 |
| 960 <sup>50</sup> | CCCN(CCC)C(=O)c1ccc(cc1)C(=O)N[C@@H](Cc2cc(F)cc(F)e2)[C@@H](O)CN[C@@H](C)C(=O)NCCC(C)C                                   | 3.301 | 4.385 | 3.931 | 4.211 | 4.056 | 65.510 |
| 961 <sup>50</sup> | CCCN(CCC)C(=O)c1ccc(cc1)C(=O)N[C@@H](Cc2cc(F)cc(F)e2)[C@@H](O)CN[C@@H](C)C(=O)NCCC(C)C                                   | 4.155 | 4.095 | 3.682 | 4.453 | 4.848 | 70.992 |
| 962 <sup>50</sup> | CCCN(CCC)C(=O)c1ccc(cc1)C(=O)N[C@@H](Cc2cc(F)cc(F)e2)[C@@H](O)CNC(C)C(=O)NCCC(C)C                                        | 3.699 | 3.720 | 3.337 | 4.578 | 4.206 | 62.859 |
| 963 <sup>50</sup> | CCCN(CCC)C(=O)c1ccc(cc1)C(=O)N[C@@H](Cc2cc(F)cc(F)e2)[C@@H](O)CNCc3cccc3                                                 | 3.886 | 4.216 | 4.343 | 4.734 | 2.121 | 45.665 |
| 964 <sup>51</sup> | C1CNCCN1c2ccc(Br)cc2NC(=O)c3cccc(c34)cccc4                                                                               | 3.000 | 2.385 | 2.629 | 2.208 | 3.545 | 54.223 |
| 965 <sup>51</sup> | OCCN(CC1)CCN1c2ccc(Br)cc2NC(=O)c3cccc(c34)cccc4                                                                          | 4.102 | 3.505 | 3.949 | 3.356 | 4.568 | 63.879 |
| 966 <sup>51</sup> | c1cccc(e12)cccc2C(=O)Nc3ccc(-c4cccc4)ccc3N5CCN(CC5)C6c6cccc6                                                             | 2.903 | 3.589 | 2.955 | 3.920 | 3.976 | 57.645 |
| 967 <sup>51</sup> | C1CNCCN1c2ccc(-c3cccc3)cc2NC(=O)c4cccc(c45)cccc5                                                                         | 3.523 | 2.370 | 3.031 | 2.795 | 3.303 | 52.331 |
| 968 <sup>51</sup> | OCCN(CC1)CCN1c2ccc(-c3cccc3)cc2NC(=O)c4cccc(c45)cccc5                                                                    | 3.959 | 3.576 | 3.837 | 3.697 | 3.549 | 61.423 |
| 969 <sup>51</sup> | c1cccc(e12)cccc2C(=O)Nc3ccc(-c4cccc4)ccc3N5CCN(CC5)CC(=O)OCC                                                             | 4.046 | 3.674 | 3.437 | 3.589 | 3.832 | 51.745 |
|                   | c1cccc(e12)cccc2C(=O)Nc3ccc(-                                                                                            | 4.000 | 2.840 | 4.102 | 4.504 | 2.705 | 58.248 |

|                   |                                                                        |       |       |       |       |       |        |
|-------------------|------------------------------------------------------------------------|-------|-------|-------|-------|-------|--------|
|                   | c4cccc4)ccc3N5CCN(CC5)CCCCN(C6=O)C(=O)c(c67)cccc7                      |       |       |       |       |       |        |
| 971 <sup>51</sup> | c1cccc(c12)cccc2C(=O)Nc3cc(-c4cccc4)ccc3N5CCN(CC5)CCCCCN               | 4.167 | 4.421 | 4.069 | 3.525 | 4.310 | 68.156 |
| 972 <sup>51</sup> | c1cccc(c12)cccc2C(=O)Nc3cc(-c4cccc4)ccc3N5CCN(CC5)CC[C@@H](O)c6cccc6   | 4.161 | 3.722 | 3.836 | 3.898 | 4.171 | 57.320 |
| 973 <sup>51</sup> | c1cccc(c12)cccc2C(=O)Nc3cc(-c4cccc4)ccc3N5CCN(CC5)C(=O)c6cccc6         | 4.102 | 4.104 | 3.851 | 3.933 | 3.844 | 64.248 |
| 974 <sup>51</sup> | c1cccc(c12)cccc2C(=O)Nc3cc(-c4cccc4)ccc3N5CCN(CC5)C(=O)CCCCC6SCCS6     | 2.420 | 3.488 | 3.062 | 3.326 | 2.839 | 36.470 |
| 975 <sup>51</sup> | c1cccc(c12)oc(=O)c(c2)C(=O)Nc3cc(Br)ccc3N4CCN(CC4)C(=O)OC(C)(C)C       | 3.000 | 3.411 | 3.076 | 2.719 | 3.020 | 48.654 |
| 976 <sup>51</sup> | c1cccc(c12)oc(=O)c(c2)C(=O)Nc3cc(Br)ccc3N4CCN(CC4)Cc5cccc5             | 3.119 | 3.292 | 2.732 | 3.172 | 3.692 | 56.221 |
| 977 <sup>51</sup> | OCCN(CC1)CCN1c2ccc(Br)cc2NC(=O)c(c3)c(=O)oc(c34)cccc4                  | 3.201 | 3.227 | 2.949 | 3.323 | 3.373 | 59.741 |
| 978 <sup>51</sup> | OCCN(CC1)CCN1c2ccc(Br)cc2NC(=O)c(c3)c(=O)oc(c34)c(OC)ccc4              | 3.000 | 2.874 | 2.630 | 3.609 | 3.054 | 64.412 |
| 979 <sup>51</sup> | c1cccc(c12)oc(=O)c(c2)C(=O)Nc3cc(-c4cccc4)ccc3N5CCN(CC5)C(=O)OC(C)(C)C | 2.000 | 1.883 | 1.964 | 2.264 | 1.829 | 62.697 |
| 980 <sup>51</sup> | c1cccc(c12)oc(=O)c(c2)C(=O)Nc3cc(-c4cccc4)ccc3N5CCN(CC5)Cc6cccc6       | 3.821 | 2.780 | 2.781 | 3.704 | 4.097 | 58.405 |

| Name        | Structure | 1: COEFFICIENT |
|-------------|-----------|----------------|-------------|-----------|----------------|-------------|-----------|----------------|-------------|-----------|----------------|
| frag1024641 |           | 0.01           | frag567248  |           | 0.01           | frag1016021 |           | -0.01          | frag1210351 |           | -0.01          |
| frag257809  |           | 0.01           | frag389092  |           | 0.01           | frag1015983 |           | -0.01          | frag710502  |           | -0.01          |
| frag37219   |           | 0.01           | frag1032956 |           | 0.01           | frag219767  |           | -0.01          | frag219564  |           | -0.01          |
| frag1228108 |           | 0.01           | frag379514  |           | 0.01           | frag670006  |           | -0.01          | frag492790  |           | -0.01          |

**A**

**B**

Figure S1: (A) Favorable and (B) unfavorable fragments for BACE inhibitory activity

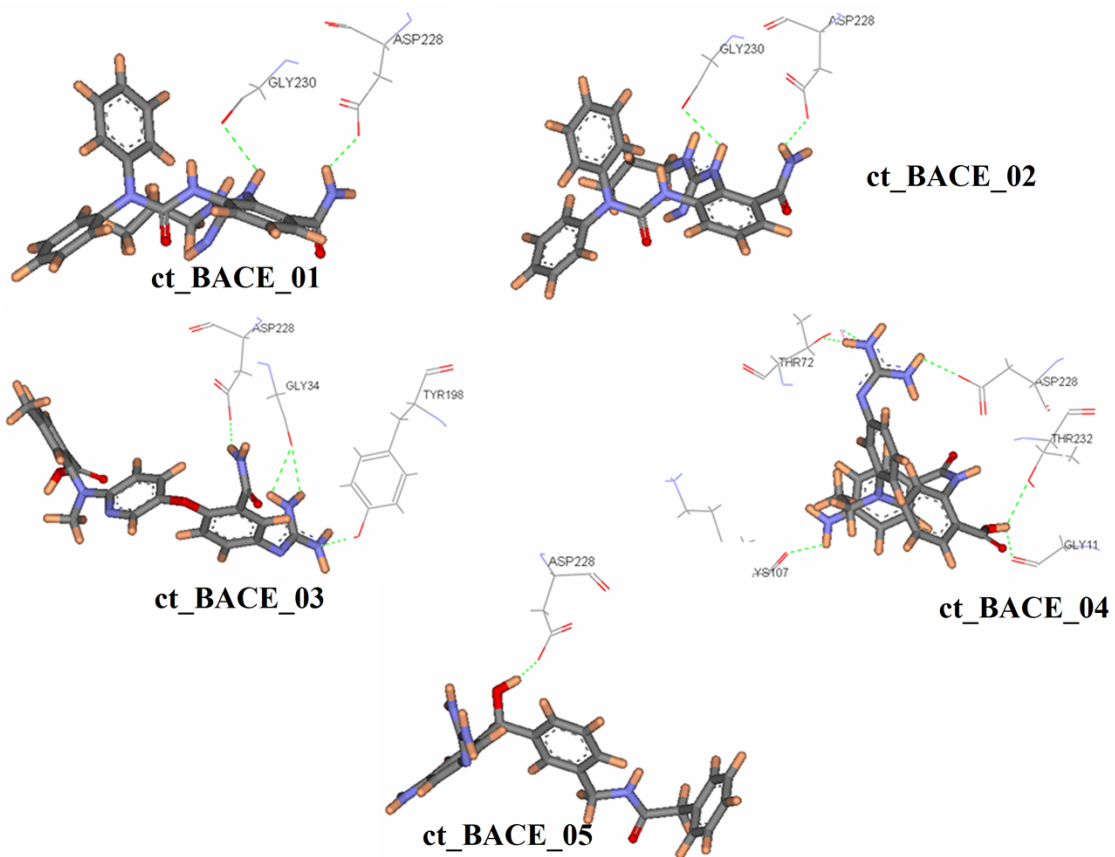

Figure S2: Hit molecules from *de novo* design showing interactions at the catalytic site of the receptor



## References

1. L. Piazzzi, A. Cavalli, F. Colizzi, F. Belluti, M. Bartolini, F. Mancini, M. Recanatini, V. Andrisano and A. Rampa, *Bioorg. Med. Chem. Lett.*, 2008, **18**, 423-426.
2. T. Kimura, Y. Hamada, M. Stochaj, H. Ikari, A. Nagamine, H. Abdel-Rahman, N. Igawa, K. Hidaka, J. T. Nguyen, K. Saito, Y. Hayashi and Y. Kiso, *Bioorg. Med. Chem. Lett.*, 2006, **16**, 2380-2386.
3. T. Kimura, D. Shuto, Y. Hamada, N. Igawa, S. Kasai, P. Liu, K. Hidaka, T. Hamada, Y. Hayashi and Y. Kiso, *Bioorg. Med. Chem. Lett.*, 2005, **15**, 211-215.
4. L. D. Jennings, D. C. Cole, J. R. Stock, M. N. Sukhdeo, J. W. Ellingboe, R. Cowling, G. Jin, E. S. Manas, K. Y. Fan, M. S. Malamas, B. L. Harrison, S. Jacobsen, R. Chopra, P. A. Lohse, W. J. Moore, M. M. O'Donnell, Y. Hu, A. J. Robichaud, M. J. Turner, E. Wagner and J. Bard, *Bioorg. Med. Chem. Lett.*, 2008, **18**, 767-771.
5. C. Garino, N. Pietrancosta, Y. Laras, V. Moret, A. Rolland, G. Quelever and J. L. Kraus, *Bioorg. Med. Chem. Lett.*, 2006, **16**, 1995-1999.
6. B. Clarke, E. Demont, C. Dingwall, R. Dunsdon, A. Faller, J. Hawkins, I. Hussain, D. MacPherson, G. Maile, R. Matico, P. Milner, J. Mosley, A. Naylor, A. O'Brien, S. Redshaw, D. Riddell, P. Rowland, V. Soleil, K. J. Smith, S. Stanway, G. Stemp, S. Sweitzer, P. Theobald, D. Vesey, D. S. Walter, J. Ward and G. Wayne, *Bioorg. Med. Chem. Lett.*, 2008, **18**, 1011-1016.
7. N. Charrier, B. Clarke, L. Cutler, E. Demont, C. Dingwall, R. Dunsdon, J. Hawkins, C. Howes, J. Hubbard, I. Hussain, G. Maile, R. Matico, J. Mosley, A. Naylor, A. O'Brien, S. Redshaw, P. Rowland, V. Soleil, K. J. Smith, S. Sweitzer, P. Theobald, D. Vesey, D. S. Walter and G. Wayne, *Bioorg. Med. Chem. Lett.*, 2009, **19**, 3664-3668.
8. J. Madden, J. R. Dod, R. Godemann, J. Kraemer, M. Smith, M. Biniszkievicz, D. J. Hallett, J. Barker, J. D. Dyekjaer and T. Hesterkamp, *Bioorg. Med. Chem. Lett.*, 2010, **20**, 5329-5333.
9. L. R. Marcin, M. A. Higgins, F. C. Zusi, Y. Zhang, M. F. Dee, M. F. Parker, J. K. Muckelbauer, D. M. Camac, P. E. Morin, V. Ramamurthy, A. J. Tebben, K. A. Lentz, J. E. Grace, J. A. Marcinkeviciene, L. M. Kopcho, C. R. Burton, D. M. Barten, J. H. Toyn, J. E. Meredith, C. F. Albright, J. J. Bronson, J. E. Macor and L. A. Thompson, *Bioorg. Med. Chem. Lett.*, 2011, **21**, 537-541.
10. R. Machauer, S. Veenstra, J. M. Rondeau, M. Tintelnot-Blomley, C. Betschart, U. Neumann and P. Paganetti, *Bioorg. Med. Chem. Lett.*, 2009, **19**, 1361-1365.
11. S. R. Chirapu, B. Pachaiyappan, H. F. Nural, X. Cheng, H. Yuan, D. C. Lankin, S. O. Abdul-Hay, G. R. Thatcher, Y. Shen, A. P. Kozikowski and P. A. Petukhov, *Bioorg. Med. Chem. Lett.*, 2009, **19**, 264-274.
12. M. S. Malamas, A. Robichaud, J. Erdei, D. Quagliato, W. Solvibile, P. Zhou, K. Morris, J. Turner, E. Wagner, K. Fan, A. Olland, S. Jacobsen, P. Reinhart, D. Riddell and M. Pangalos, *Bioorg. Med. Chem. Lett.*, 2010, **20**, 6597-6605.
13. H. A. Jung, S. H. Oh and J. S. Choi, *Bioorg. Med. Chem. Lett.*, 2010, **20**, 3211-3215.

14. Y. Hamada, H. Abdel-Rahman, A. Yamani, J. T. Nguyen, M. Stochaj, K. Hidaka, T. Kimura, Y. Hayashi, K. Saito, S. Ishiura and Y. Kiso, *Bioorg. Med. Chem. Lett.*, 2008, **18**, 1649-1653.
15. J. M. Sealy, A. P. Truong, L. Tso, G. D. Probst, J. Aquino, R. K. Hom, B. M. Jagodzinska, D. Dressen, D. W. Wone, L. Brogley, V. John, J. S. Tung, M. A. Pleiss, J. A. Tucker, A. W. Konradi, M. S. Dappen, G. Toth, H. Pan, L. Ruslim, J. Miller, M. P. Bova, S. Sinha, K. P. Quinn and J. M. Sauer, *Bioorg. Med. Chem. Lett.*, 2009, **19**, 6386-6391.
16. B. Clarke, L. Cutler, E. Demont, C. Dingwall, R. Dunsdon, J. Hawkins, C. Howes, I. Hussain, G. Maile, R. Matico, J. Mosley, A. Naylor, A. O'Brien, S. Redshaw, P. Rowland, V. Soleil, K. J. Smith, S. Sweitzer, P. Theobald, D. Vesey, D. S. Walter and G. Wayne, *Bioorg. Med. Chem. Lett.*, 2010, **20**, 4639-4644.
17. J. N. Cumming, T. X. Le, S. Babu, C. Carroll, X. Chen, L. Favreau, P. Gaspari, T. Guo, D. W. Hobbs, Y. Huang, U. Iserloh, M. E. Kennedy, R. Kuvelkar, G. Li, J. Lowrie, N. A. McHugh, L. Ozigur, J. Pan, E. M. Parker, K. Saionz, A. W. Stamford, C. Strickland, D. Tadesse, J. Voigt, L. Wang, Y. Wu, L. Zhang and Q. Zhang, *Bioorg. Med. Chem. Lett.*, 2008, **18**, 3236-3241.
18. F. Wangsell, F. Russo, J. Savmarker, A. Rosenquist, B. Samuelsson and M. Larhed, *Bioorg. Med. Chem. Lett.*, 2009, **19**, 4711-4714.
19. A. P. Truong, G. Toth, G. D. Probst, J. M. Sealy, S. Bowers, D. W. Wone, D. Dressen, R. K. Hom, A. W. Konradi, H. L. Sham, J. Wu, B. T. Peterson, L. Ruslim, M. P. Bova, D. Kholodenko, R. N. Motter, F. Bard, P. Santiago, H. Ni, D. Chian, F. Soriano, T. Cole, E. F. Brigham, K. Wong, W. Zmolek, E. Goldbach, B. Samant, L. Chen, H. Zhang, D. F. Nakamura, K. P. Quinn, T. A. Yednock and J. M. Sauer, *Bioorg. Med. Chem. Lett.*, 2010, **20**, 6231-6236.
20. P. Nowak, D. C. Cole, A. Aulabaugh, J. Bard, R. Chopra, R. Cowling, K. Y. Fan, B. Hu, S. Jacobsen, M. Jani, G. Jin, M. C. Lo, M. S. Malamas, E. S. Manas, R. Narasimhan, P. Reinhart, A. J. Robichaud, J. R. Stock, J. Subrath, K. Svenson, J. Turner, E. Wagner, P. Zhou and J. W. Ellingboe, *Bioorg. Med. Chem. Lett.*, 2010, **20**, 632-635.
21. K. P. Moore, H. Zhu, H. A. Rajapakse, G. B. McGaughey, D. Colussi, E. A. Price, S. Sankaranarayanan, A. J. Simon, N. T. Pudvah, J. H. Hochman, T. Allison, S. K. Munshi, S. L. Graham, J. P. Vacca and P. G. Nantermet, *Bioorg. Med. Chem. Lett.*, 2007, **17**, 5831-5835.
22. P. Beswick, N. Charrier, B. Clarke, E. Demont, C. Dingwall, R. Dunsdon, A. Faller, R. Gleave, J. Hawkins, I. Hussain, C. N. Johnson, D. MacPherson, G. Maile, R. Matico, P. Milner, J. Mosley, A. Naylor, A. O'Brien, S. Redshaw, D. Riddell, P. Rowland, J. Skidmore, V. Soleil, K. J. Smith, S. Stanway, G. Stemp, A. Stuart, S. Sweitzer, P. Theobald, D. Vesey, D. S. Walter, J. Ward and G. Wayne, *Bioorg. Med. Chem. Lett.*, 2008, **18**, 1022-1026.
23. U. Iserloh, J. Pan, A. W. Stamford, M. E. Kennedy, Q. Zhang, L. Zhang, E. M. Parker, N. A. McHugh, L. Favreau, C. Strickland and J. Voigt, *Bioorg. Med. Chem. Lett.*, 2008, **18**, 418-422.
24. U. Iserloh, Y. Wu, J. N. Cumming, J. Pan, L. Y. Wang, A. W. Stamford, M. E. Kennedy, R. Kuvelkar, X. Chen, E. M. Parker, C. Strickland and J. Voigt, *Bioorg. Med. Chem. Lett.*, 2008, **18**, 414-417.

25. S. R. Stauffer, M. G. Stanton, A. R. Gregro, M. A. Steinbeiser, J. R. Shaffer, P. G. Nantermet, J. C. Barrow, K. E. Rittle, D. Collusi, A. S. Espeseth, M. T. Lai, B. L. Pietrak, M. K. Holloway, G. B. McGaughey, S. K. Munshi, J. H. Hochman, A. J. Simon, H. G. Selnick, S. L. Graham and J. P. Vacca, *Bioorg. Med. Chem. Lett.*, 2007, **17**, 1788-1792.
26. M. S. Malamas, K. Barnes, Y. Hui, M. Johnson, F. Lovering, J. Condon, W. Fobare, W. Solvibile, J. Turner, Y. Hu, E. S. Manas, K. Fan, A. Olland, R. Chopra, J. Bard, M. N. Pangalos, P. Reinhart and A. J. Robichaud, *Bioorg. Med. Chem. Lett.*, 2010, **20**, 2068-2073.
27. W. Xu, G. Chen, W. Zhu and Z. Zuo, *Bioorg. Med. Chem. Lett.*, 2010, **20**, 6203-6207.
28. T. G. Steele, I. D. Hills, A. A. Nomland, P. de Leon, T. Allison, G. McGaughey, D. Colussi, K. Tugusheva, S. J. Haugabook, A. S. Espeseth, P. Zuck, S. L. Graham and S. J. Stachel, *Bioorg. Med. Chem. Lett.*, 2009, **19**, 17-20.
29. A. Lerchner, R. Machauer, C. Betschart, S. Veenstra, H. Rueeger, C. McCarthy, M. Tintelnot-Blomley, A. L. Jaton, S. Rabe, S. Desrayaud, A. Enz, M. Staufenbiel, P. Paganetti, J. M. Rondeau and U. Neumann, *Bioorg. Med. Chem. Lett.*, 2010, **20**, 603-607.
30. H. Rueeger, J. M. Rondeau, C. McCarthy, H. Mobitz, M. Tintelnot-Blomley, U. Neumann and S. Desrayaud, *Bioorg. Med. Chem. Lett.*, 2011, **21**, 1942-1947.
31. G. D. Probst, S. Bowers, J. M. Sealy, B. Stupi, D. Dressen, B. M. Jagodzinska, J. Aquino, A. Gailunas, A. P. Truong, L. Tso, Y. Z. Xu, R. K. Hom, V. John, J. S. Tung, M. A. Pleiss, J. A. Tucker, A. W. Konradi, H. L. Sham, J. Jagodzinski, G. Toth, E. Brecht, N. Yao, H. Pan, M. Lin, D. R. Artis, L. Ruslim, M. P. Bova, S. Sinha, T. A. Yednock, S. Gauby, W. Zmolek, K. P. Quinn and J. M. Sauer, *Bioorg. Med. Chem. Lett.*, 2010, **20**, 6034-6039.
32. Y. J. Wu, Y. Zhang, A. C. Good, C. R. Burton, J. H. Toyn, C. F. Albright, J. E. Macor and L. A. Thompson, *Bioorg. Med. Chem. Lett.*, 2009, **19**, 2654-2660.
33. D. C. Cole, J. R. Stock, R. Chopra, R. Cowling, J. W. Ellingboe, K. Y. Fan, B. L. Harrison, Y. Hu, S. Jacobsen, L. D. Jennings, G. Jin, P. A. Lohse, M. S. Malamas, E. S. Manas, W. J. Moore, M. M. O'Donnell, A. M. Olland, A. J. Robichaud, K. Svenson, J. Wu, E. Wagner and J. Bard, *Bioorg. Med. Chem. Lett.*, 2008, **18**, 1063-1066.
34. B. Clarke, E. Demont, C. Dingwall, R. Dunsdon, A. Faller, J. Hawkins, I. Hussain, D. MacPherson, G. Maile, R. Matico, P. Milner, J. Mosley, A. Naylor, A. O'Brien, S. Redshaw, D. Riddell, P. Rowland, V. Soleil, K. J. Smith, S. Stanway, G. Stemp, S. Sweitzer, P. Theobald, D. Vesey, D. S. Walter, J. Ward and G. Wayne, *Bioorg. Med. Chem. Lett.*, 2008, **18**, 1017-1021.
35. N. Charrier, B. Clarke, L. Cutler, E. Demont, C. Dingwall, R. Dunsdon, J. Hawkins, C. Howes, J. Hubbard, I. Hussain, G. Maile, R. Matico, J. Mosley, A. Naylor, A. O'Brien, S. Redshaw, P. Rowland, V. Soleil, K. J. Smith, S. Sweitzer, P. Theobald, D. Vesey, D. S. Walter and G. Wayne, *Bioorg. Med. Chem. Lett.*, 2009, **19**, 3674-3678.
36. S. R. Lindsley, K. P. Moore, H. A. Rajapakse, H. G. Selnick, M. B. Young, H. Zhu, S. Munshi, L. Kuo, G. B. McGaughey, D. Colussi, M. C. Crouthamel, M. T. Lai, B. Pietrak, E. A. Price, S. Sankaranarayanan, A. J. Simon, G. R. Seabrook, D.

- J. Hazuda, N. T. Pudvah, J. H. Hochman, S. L. Graham, J. P. Vacca and P. G. Nantermet, *Bioorg. Med. Chem. Lett.*, 2007, **17**, 4057-4061.
37. H. A. Rajapakse, P. G. Nantermet, H. G. Selnick, J. C. Barrow, G. B. McGaughey, S. Munshi, S. R. Lindsley, M. B. Young, P. L. Ngo, M. K. Holloway, M. T. Lai, A. S. Espeseth, X. P. Shi, D. Colussi, B. Pietrak, M. C. Crouthamel, K. Tugusheva, Q. Huang, M. Xu, A. J. Simon, L. Kuo, D. J. Hazuda, S. Graham and J. P. Vacca, *Bioorg. Med. Chem. Lett.*, 2010, **20**, 1885-1889.
38. N. Charrier, B. Clarke, E. Demont, C. Dingwall, R. Dunsdon, J. Hawkins, J. Hubbard, I. Hussain, G. Maile, R. Matico, J. Mosley, A. Naylor, A. O'Brien, S. Redshaw, P. Rowland, V. Soleil, K. J. Smith, S. Sweitzer, P. Theobald, D. Vesey, D. S. Walter and G. Wayne, *Bioorg. Med. Chem. Lett.*, 2009, **19**, 3669-3673.
39. C. A. Coburn, S. J. Stachel, K. G. Jones, T. G. Steele, D. M. Rush, J. DiMuzio, B. L. Pietrak, M. T. Lai, Q. Huang, J. Lineberger, L. Jin, S. Munshi, M. Katharine Holloway, A. Espeseth, A. Simon, D. Hazuda, S. L. Graham and J. P. Vacca, *Bioorg. Med. Chem. Lett.*, 2006, **16**, 3635-3638.
40. W. Xu, G. Chen, O. W. Liew, Z. Zuo, H. Jiang and W. Zhu, *Bioorg. Med. Chem. Lett.*, 2009, **19**, 3188-3192.
41. S. H. Chen, J. Lamar, D. Guo, T. Kohn, H. C. Yang, J. McGee, D. Timm, J. Erickson, Y. Yip, P. May and J. McCarthy, *Bioorg. Med. Chem. Lett.*, 2004, **14**, 245-250.
42. J. Hu, C. L. Cwi, D. L. Smiley, D. Timm, J. A. Erickson, J. E. McGee, H. C. Yang, D. Mendel, P. C. May, M. Shapiro and J. R. McCarthy, *Bioorg. Med. Chem. Lett.*, 2003, **13**, 4335-4339.
43. S. J. Stachel, C. A. Coburn, T. G. Steele, M. C. Crouthamel, B. L. Pietrak, M. T. Lai, M. K. Holloway, S. K. Munshi, S. L. Graham and J. P. Vacca, *Bioorg. Med. Chem. Lett.*, 2006, **16**, 641-644.
44. J. Lamar, J. Hu, A. B. Bueno, H. C. Yang, D. Guo, J. D. Copp, J. McGee, B. Gitter, D. Timm, P. May, J. McCarthy and S. H. Chen, *Bioorg. Med. Chem. Lett.*, 2004, **14**, 239-243.
45. B. Hu, K. Y. Fan, K. Bridges, R. Chopra, F. Lovering, D. Cole, P. Zhou, J. Ellingboe, G. Jin, R. Cowling and J. Bard, *Bioorg. Med. Chem. Lett.*, 2004, **14**, 3457-3460.
46. W. F. Fobare, W. R. Solvibile, A. J. Robichaud, M. S. Malamas, E. Manas, J. Turner, Y. Hu, E. Wagner, R. Chopra, R. Cowling, G. Jin and J. Bard, *Bioorg. Med. Chem. Lett.*, 2007, **17**, 5353-5356.
47. Z. Zhu, Z. Y. Sun, Y. Ye, J. Voigt, C. Strickland, E. M. Smith, J. Cumming, L. Wang, J. Wong, Y. S. Wang, D. F. Wyss, X. Chen, R. Kuvelkar, M. E. Kennedy, L. Favreau, E. Parker, B. A. McKittrick, A. Stamford, M. Czarniecki, W. Greenlee and J. C. Hunter, *J. Med. Chem.*, 2010, **53**, 951-965.
48. M. S. Malamas, J. Erdei, I. Gunawan, K. Barnes, M. Johnson, Y. Hui, J. Turner, Y. Hu, E. Wagner, K. Fan, A. Olland, J. Bard and A. J. Robichaud, *J. Med. Chem.*, 2009, **52**, 6314-6323.
49. S. Hanessian, H. Yun, Y. Hou, G. Yang, M. Bayrakdarian, E. Therrien, N. Moitessier, S. Roggo, S. Veenstra, M. Tintelnot-Blomley, J. M. Rondeau, C. Ostermeier, A. Strauss, P. Ramage, P. Paganetti, U. Neumann and C. Betschart, *J. Med. Chem.*, 2005, **48**, 5175-5190.

50. M. C. Maillard, R. K. Hom, T. E. Benson, J. B. Moon, S. Mamo, M. Bienkowski, A. G. Tomasselli, D. D. Woods, D. B. Prince, D. J. Paddock, T. L. Emmons, J. A. Tucker, M. S. Dappen, L. Brogley, E. D. Thorsett, N. Jewett, S. Sinha and V. John, *J. Med. Chem.*, 2007, **50**, 776-781.
51. C. Garino, T. Tomita, N. Pietrancosta, Y. Laras, R. Rosas, G. Herbette, B. Maignet, G. Quelever, T. Iwatsubo and J. L. Kraus, *J. Med. Chem.*, 2006, **49**, 4275-4285.
